# Supplementary material
Source: PubMed Central journal article supplement (PMC3750119)

# Supporting Information

Benzyne Click Chemistry:

Synthesis of Benzotriazoles from Benzyne and Azides

Feng Shi, Jesse P. Waldo, Yu Chen, and Richard C. Larock\*

*Department of Chemistry, Iowa State University, Ames, IA 50010*

larock@iastate.edu

## Table of Contents

|                                                               |         |
|---------------------------------------------------------------|---------|
| General Information.....                                      | S2      |
| Preparation of Azides.....                                    | S2-S5   |
| Reaction Procedure and Characterization of Products.....      | S5-S8   |
| References.....                                               | S9      |
| Copies of <sup>1</sup> H and <sup>13</sup> C NMR Spectra..... | S10-S52 |

## General information

All reactions were carried out in oven-dried glassware and monitored by thin layer chromatography (SiO<sub>2</sub>, hexanes or hexanes/EtOAc). THF was distilled over Na. DCM was distilled over CaH<sub>2</sub>. Anhydrous MeCN was used as received. Powered CsF and a TBAF solution (1 M in THF) were used as received. Benzyne precursor **2a** is commercially available and was used as received. Other benzyne precursors were prepared according to literature procedures.<sup>1</sup> Azides that are commercially available (**1a**, **1l**, **1r**, **1s**) were used as received. Non-commercial azides were prepared according to the following procedures.

The <sup>1</sup>H and <sup>13</sup>C NMR spectra are referenced to the residual signals of CDCl<sub>3</sub> (7.24 ppm for <sup>1</sup>H and 77.0 ppm for <sup>13</sup>C). Melting points are uncorrected. The high resolution mass spectra were recorded using EI at 70 eV.

## Preparation of non-commercial azides

General procedure A (oxidation of the corresponding boronic acid, applied to the preparation of azides **1b**, **1i** and **1q**):<sup>2</sup> to a suspension of CuSO<sub>4</sub>·5H<sub>2</sub>O (10 mol %) and NaN<sub>3</sub> (1.2 equiv) in MeOH (0.3 M) was added the corresponding boronic acid in one portion. The suspension was stirred vigorously in an open flask for 1 day. The MeOH was evaporated and the residue was extracted with hexanes. The combined hexanes were evaporated and the residue was chromatographed (hexanes) to afford the azides.

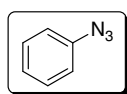

Phenyl azide (**1b**). General procedure A was applied to 5.0 mmol of phenylboronic acid to afford **1b** in a 22% yield as a colorless oil: <sup>1</sup>H NMR (CDCl<sub>3</sub>, 300 MHz) δ 7.34 (t, *J* = 7.6 Hz, 2 H), 7.13 (t, *J* = 7.0 Hz, 2 H), 7.00-7.03 (m, 2 H). This compound has been fully characterized previously.<sup>3</sup>

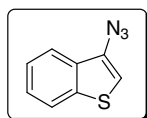

3-Azidobenzo[*b*]thiophene (**1i**). General procedure A was applied to 4.0 mmol of benzothiophene-3-boronic acid to afford **1i** in a 66% yield as a yellow solid: mp 50-51 °C (dec); <sup>1</sup>H NMR (CDCl<sub>3</sub>, 400 MHz) δ 7.76-7.81 (m, 1 H), 7.69-7.73 (m, 1 H), 7.36-7.40 (m, 2 H), 6.96 (s, 1 H); <sup>13</sup>C NMR (CDCl<sub>3</sub>, 100 MHz) δ 138.8, 132.7, 131.9, 125.4, 124.4, 122.9, 121.0, 109.7.

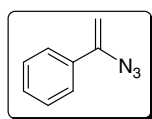

1-Azido-1-phenylethylene (**1q**). General procedure A was applied to 4.0 mmol of 1-phenylvinylboronic acid to afford **1q** in a 40% yield as a yellow oil: <sup>1</sup>H NMR (CDCl<sub>3</sub>, 300 MHz) δ 7.54-7.57 (m, 2 H), 7.33-7.37 (m, 3 H), 5.42 (d, *J* = 2.4 Hz, 1 H), 4.95 (d, *J* = 2.4 Hz, 1 H); <sup>13</sup>C NMR (CDCl<sub>3</sub>, 100 MHz) δ 145.0, 134.2, 129.1, 128.4, 125.5, 98.0.

General procedure B (azide displacement of the corresponding aryldiazonium salt, applied to the preparation of azides **1c** through **1h**):<sup>3,4</sup> to a solution of the corresponding aromatic amine in MeCN (0.5 M) at 0 °C was added *tert*-butyl nitrite (1.5 equiv), followed by TMS azide (1.2 equiv) dropwise. The flask was taken out of the cold bath and stirred at room temperature for 2 h before the solvent was evaporated and the residue was chromatographed (hexanes or hexanes/DCM) to afford the azides.

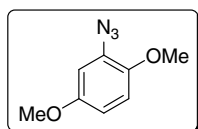

2-Azido-1,4-dimethoxybenzene (**1c**). General procedure B was applied to 2.0 mmol of 2,5-dimethoxyaniline to afford **1c** in a 60% yield as a yellow oil: <sup>1</sup>H

NMR (CDCl<sub>3</sub>, 300 MHz)  $\delta$  6.80 (d,  $J$  = 8.8 Hz, 1 H), 6.56-6.62 (m, 2 H), 3.81 (s, 3 H), 3.74 (s, 3 H); <sup>13</sup>C NMR (CDCl<sub>3</sub>, 100 MHz)  $\delta$  154.1, 146.1, 129.0, 113.2, 110.0, 106.6, 56.6, 55.7.

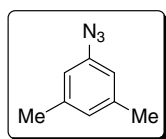

1-Azido-3,5-dimethylbenzene (**1d**). General procedure B was applied to 2.0 mmol of 3,5-dimethylaniline to afford **1d** in a 90% yield as a yellow oil: <sup>1</sup>H NMR (CDCl<sub>3</sub>, 300 MHz)  $\delta$  6.76 (s, 1 H), 6.64 (s, 2 H), 2.29 (s, 6 H); <sup>13</sup>C NMR (CDCl<sub>3</sub>, 100 MHz)  $\delta$  139.62, 139.57, 126.7, 116.7, 21.2.

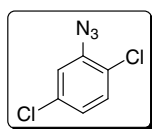

2-Azido-1,4-dichlorobenzene (**1e**). General procedure B was applied to 2.0 mmol of 2,5-dichloroaniline to afford **1e** in an 81% yield as a yellow oil. <sup>1</sup>H NMR (CDCl<sub>3</sub>, 400 MHz)  $\delta$  7.28 (d,  $J$  = 8.6 Hz, 1 H), 7.14 (d,  $J$  = 2.4 Hz, 1 H), 7.04 (dd,  $J$  = 8.6, 2.3 Hz, 1 H); <sup>13</sup>C NMR (CDCl<sub>3</sub>, 100 MHz)  $\delta$  138.3, 133.4, 131.4, 125.7, 123.4, 119.7.

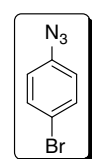

1-Azido-4-bromobenzene (**1f**). General procedure B was applied to 2.0 mmol of 4-bromoaniline to afford **1f** in a 91% yield as a yellow oil: <sup>1</sup>H NMR (CDCl<sub>3</sub>, 400 MHz)  $\delta$  7.42-7.45 (m, 2 H), 6.86-6.89 (m, 2 H); <sup>13</sup>C NMR (CDCl<sub>3</sub>, 100 MHz)  $\delta$  139.1, 132.7, 120.6, 117.7.

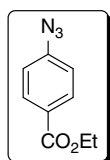

Ethyl 4-azidobenzoate (**1g**). General procedure B was applied to 2.0 mmol of ethyl 4-aminobenzoate to afford **1g** in a 100% yield as a yellow oil: <sup>1</sup>H NMR (CDCl<sub>3</sub>, 400 MHz)  $\delta$  8.00-8.03 (m, 2 H), 7.03-7.05 (m, 2 H), 4.35 (q,  $J$  = 7.1 Hz, 1 H), 1.37 (t,  $J$  = 7.1 Hz, 1 H); <sup>13</sup>C NMR (CDCl<sub>3</sub>, 100 MHz)  $\delta$  165.8, 144.5, 131.3, 127.0, 118.7, 61.0, 14.3.

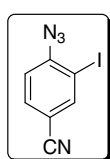

4-Azido-3-iodobenzonitrile (**1h**). General procedure B was applied to 4.0 mmol of 4-amino-3-iodobenzonitrile to afford **1h** in a 91% yield as a slightly yellow-pink solid: mp 126-128 °C; <sup>1</sup>H NMR (CDCl<sub>3</sub>, 400 MHz)  $\delta$  8.04 (d,  $J$  = 1.8 Hz, 1 H), 7.65 (dd,  $J$  = 8.4, 1.8 Hz, 1 H), 7.18 (d,  $J$  = 8.3 Hz, 1 H); <sup>13</sup>C NMR (CDCl<sub>3</sub>, 100 MHz)  $\delta$  146.6, 143.3, 133.1, 118.4, 116.8, 109.6, 87.6.

General procedure C (S<sub>N</sub>2 displacement of an activated alkyl bromide, applied to the preparation of azides **1k** and **1m**):<sup>5,6</sup> to a solution of the corresponding bromide in water/acetone (1:3, 0.25 M) was added NaN<sub>3</sub> (2.0 equiv) and the mixture was stirred at room temperature for 30 min. The reaction mixture was diluted with DCM and washed with water. The organic layer was dried over MgSO<sub>4</sub> and evaporated. The crude material is generally clean enough to be used without further purification.

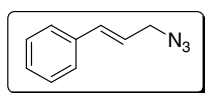

Cinnamyl azide (**1k**). General procedure C was applied to 2.0 mmol of cinnamyl bromide to afford **1k** in a 100% yield as a colorless oil: <sup>1</sup>H NMR (CDCl<sub>3</sub>, 400 MHz)  $\delta$  7.26-7.42 (m, 5 H), 6.65 (d,  $J$  = 15.7 Hz, 1 H), 6.24 (dt,  $J$  = 15.7, 6.6 Hz, 1 H), 3.94 (d,  $J$  = 6.4 Hz, 2 H); <sup>13</sup>C NMR (CDCl<sub>3</sub>, 100 MHz)  $\delta$  135.9, 134.5, 128.6, 128.1, 126.6, 122.3, 53.0.

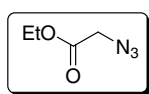

Ethyl 2-azidoacetate (**1m**). General procedure C was applied to 2.0 mmol of ethyl bromoacetate to afford **1m** in a 100% yield as a colorless oil: <sup>1</sup>H NMR (CDCl<sub>3</sub>, 400 MHz)  $\delta$  4.23 (q,  $J$  = 7.1 Hz, 2 H), 3.83 (s, 2 H), 1.28 (t,  $J$  = 7.1 Hz, 3 H); <sup>13</sup>C NMR (CDCl<sub>3</sub>, 100 MHz)  $\delta$  168.2, 61.8, 50.3, 14.1.

Miscellaneous azides:

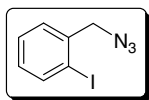

1-(Azidomethyl)-2-iodobenzene (**1j**).<sup>7</sup> To a solution of 1-(bromomethyl)-2-iodobenzene (5.0 mmol) in DMF (13 mL) was added NaN<sub>3</sub> (6.2 mmol, 1.24 equiv). The mixture was stirred at 100 °C overnight before being cooled to room temperature. The reaction mixture was diluted with EtOAc, washed once with saturated aqueous NaHCO<sub>3</sub>, then twice with water. The organic layer was dried over MgSO<sub>4</sub> and evaporated. The crude residue was purified by chromatography (10:1 hexanes/EtOAc) to afford 1.25 g of **1j** (97%) as a colorless oil: <sup>1</sup>H NMR (CDCl<sub>3</sub>, 300 MHz) δ 7.86 (d, *J* = 7.8 Hz, 1 H), 7.35-7.37 (m, 2 H), 6.99-7.05 (m, 1 H), 4.44 (s, 2 H); <sup>13</sup>C NMR (CDCl<sub>3</sub>, 100 MHz) δ 139.6, 138.0, 129.8, 129.4, 128.5, 98.9, 58.9.

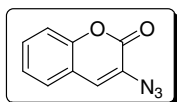

3-Azidocoumarin (**1n**).<sup>8</sup> To a suspension of *N*-acetylglycine (12.5 mmol, 1 equiv) in dry benzene (60 mL) was added Et<sub>3</sub>N (31.3 mmol, 2.5 equiv), followed by dropwise addition of benzenesulfonyl chloride (12.5 mmol, 1 equiv). The mixture was stirred at room temperature for 4 h and a yellow suspension was obtained. The resulting suspension was filtered to remove the triethylamine hydrochloride salt. To the filtrate was added salicylaldehyde (12.5 mmol) and the mixture was refluxed for 2.5 h. Solvent was removed and the residue was suspended in hot EtOH (50 mL). The solid was collected via suction filtration, and the mother liquor was cooled to room temperature. More solid was formed and collected, and the mother liquor was further cooled to 0 °C. More solid was formed and collected. The combined product was dried under a vacuum to afford 1.47 g of yellow solid (3-acetamidocoumarin, 58% crude yield). This material was dissolved in a mixture of EtOH (12 mL) and concentrated HCl (24 mL). After being refluxed for 2 h, it was cooled to room temperature. Ice (~20 g) was added and the reaction mixture was cooled to 0 °C. While keeping the reaction temperature below 5 °C, NaNO<sub>2</sub> (17.5 mmol, ~2.4 equiv) was added in small portions, followed by a NaN<sub>3</sub> (21.4 mmol, ~3 equiv) solution (in 2 mL of water) dropwise. The reaction was stirred at 0-5 °C for 40 min and then room temperature overnight. The reaction mixture was extracted with EtOAc, washed with NaHCO<sub>3</sub>, followed by water, dried over MgSO<sub>4</sub>, and chromatographed (5:1 hexanes/EtOAc) to afford 430 mg of **1n** as an orange solid (32%): mp 112 °C (dec, lit<sup>9</sup> 117-118 °C); <sup>1</sup>H NMR (CDCl<sub>3</sub>, 300 MHz) δ 7.39-7.48 (m, 2 H), 7.24-7.34 (m, 2 H), 7.19 (s, 1 H); <sup>13</sup>C NMR (CDCl<sub>3</sub>, 100 MHz) δ 157.4, 151.2, 130.4, 127.2, 126.4, 125.7, 125.1, 119.2, 116.5.

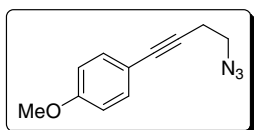

4-Azido-1-(4-methoxyphenyl)-1-butyne (**1o**). A mixture of 4-iodoanisole (4.0 mmol), 3-butyne-1-ol (5.0 mmol, 1.25 equiv), PdCl<sub>2</sub>(PPh<sub>3</sub>)<sub>2</sub> (0.12 mmol, 3 mol %), and CuI (0.12 mmol, 3 mol %) in Et<sub>3</sub>N (10 mL) and DMF (2 mL) was stirred at 50 °C for 2 h and 15 min. The reaction was then diluted with EtOAc and washed with water three times. The organic layer was dried over MgSO<sub>4</sub>, and chromatographed (1.25:1 hexanes/EtOAc) to afford 680 mg of 4-(4-methoxyphenyl)but-3-yn-1-ol (97%) as a yellow solid: <sup>1</sup>H NMR (CDCl<sub>3</sub>, 300 MHz) δ 7.31-7.34 (m, 2 H), 6.79-6.82 (m, 2 H), 3.78 (s, 3 H), 3.78 (q, *J* = 6.3 Hz, 2 H), 2.66 (t, *J* = 6.3 Hz, 2 H).

This alcohol (3.86 mmol), together with Et<sub>3</sub>N (6.2 mmol, 1.6 equiv) and DMAP (0.19 mmol, 5 mol %), was dissolved in DCM (20 mL). To this solution was added TsCl (5.4 mmol, 1.4 equiv) in portions. The reaction was stirred at room temperature overnight, and poured into saturated aqueous NaHCO<sub>3</sub>. The layers were separated and the aqueous layer was extracted twice with DCM. The combined organic layers were dried over MgSO<sub>4</sub> and chromatographed (4:1 hexanes/EtOAc) to afford 1.21 g of 4-(4-methoxyphenyl)but-3-ynyl tosylate (95%) as a slightly yellow oil: <sup>1</sup>H NMR

(CDCl<sub>3</sub>, 300 MHz)  $\delta$  7.79-7.81 (m, 2 H), 7.28-7.31 (m, 2 H), 7.23-7.26 (m, 2 H), 6.77-6.80 (m, 2 H), 4.15 (t,  $J = 7.1$  Hz, 2 H), 3.78 (s, 3 H), 2.74 (t,  $J = 7.1$  Hz, 2 H), 2.41 (s, 3 H).

The tosylate (2.0 mmol) was dissolved in DMF (15 mL). To this solution was added NaN<sub>3</sub> (2.3 mmol, 1.15 equiv). The mixture was stirred at 50 °C for 12 h, diluted with EtOAc, and washed with water three times. The organic layer was dried over MgSO<sub>4</sub>, and chromatographed (10:1 hexanes/EtOAc) to afford 400 mg of **1o** (100%) as a colorless oil: <sup>1</sup>H NMR (CDCl<sub>3</sub>, 300 MHz)  $\delta$  7.31-7.35 (m, 2 H), 6.79-6.82 (m, 2 H), 3.77 (s, 3 H), 3.44 (t,  $J = 6.7$  Hz, 2 H), 2.68 (t,  $J = 6.7$  Hz, 2 H); <sup>13</sup>C NMR (CDCl<sub>3</sub>, 100 MHz)  $\delta$  159.3, 132.9, 115.2, 113.8, 84.2, 82.3, 55.2, 50.0, 20.6.

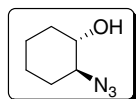

*trans*-2-Azidocyclohexanol (**1p**).<sup>10</sup> To a solution of cyclohexene oxide (4.0 mmol) in EtOH (10 mL) was added NH<sub>4</sub>Cl (8.0 mmol, 2.0 equiv), followed by NaN<sub>3</sub> (8.0 mmol, 2.0 equiv). The mixture was refluxed for 1 d, cooled to room temperature, and poured into saturated aqueous NH<sub>4</sub>Cl, then extracted with EtOAc. The combined organic layers were dried over MgSO<sub>4</sub> and chromatographed (10:1 hexanes/EtOAc) to afford 400 mg of **1p** (90%) as colorless crystals, which melt readily in hand (mp < 35 °C): <sup>1</sup>H NMR (CDCl<sub>3</sub>, 300 MHz)  $\delta$  3.31-3.39 (m, 1 H), 3.11-3.20 (m, 1 H), 2.32 (d,  $J = 3.2$  Hz, 1 H), 1.96-2.07 (m, 2 H), 1.69-1.76 (m, 2 H), 1.22-1.35 (m, 4 H); <sup>13</sup>C NMR (CDCl<sub>3</sub>, 100 MHz)  $\delta$  73.5, 67.1, 33.0, 29.7, 24.2, 23.8.

## Experimental procedure for the [3+2] cycloaddition of azides to benzynes and product characterization

General procedure: to a solution of benzyne precursor (0.35 mmol, 1.17 equiv) and azide (0.30 mmol) in dry MeCN (3 mL) was added CsF (0.60 mmol, 2.0 equiv). The reaction vial was sealed and the reaction mixture stirred at room temperature for 18-24 h before being poured into saturated aqueous NaHCO<sub>3</sub>. The resulting mixture was extracted with EtOAc or DCM, and the combined organic layers were dried over MgSO<sub>4</sub> and evaporated. The residue was purified by silica gel chromatography (hexane/EtOAc).

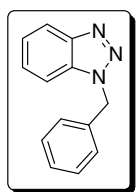

1-Benzyl-1*H*-benzo[*d*][1,2,3]triazole (**3a**). Slightly yellow solid: mp 114-115 °C; <sup>1</sup>H NMR (CDCl<sub>3</sub>, 400 MHz)  $\delta$  8.05 (dd,  $J = 8.1, 1.1$  Hz, 1 H), 7.24-7.40 (m, 8 H), 5.83 (s, 2 H); <sup>13</sup>C NMR (CDCl<sub>3</sub>, 100 MHz)  $\delta$  146.3, 134.7, 132.7, 128.9, 128.4, 127.5, 127.3, 123.9, 120.0, 109.7, 52.2; LRMS (EI) 209 (26), 180 (62), 152 (9), 91 (100); HRMS (EI) calcd for C<sub>13</sub>H<sub>11</sub>N<sub>3</sub> 209.0953, found 209.0957.

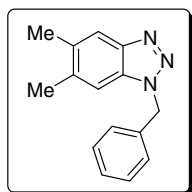

1-Benzyl-5,6-dimethyl-1*H*-benzo[*d*][1,2,3]triazole (**3b**). Slightly yellow solid: mp 158-161 °C; <sup>1</sup>H NMR (CDCl<sub>3</sub>, 300 MHz)  $\delta$  7.78 (s, 1 H), 7.23-7.32 (m, 5 H), 7.10 (s, 1 H), 5.78 (s, 2 H), 2.37 (s, 3 H), 2.34 (s, 3 H); <sup>13</sup>C NMR (CDCl<sub>3</sub>, 100 MHz)  $\delta$  145.5, 137.7, 135.0, 133.7, 131.8, 128.9, 128.3, 127.4, 119.0, 109.0, 52.0, 20.9, 20.4; LRMS (EI) 237 (9), 208 (11), 194 (7), 118 (7), 91 (100); HRMS (EI) calcd for C<sub>15</sub>H<sub>15</sub>N<sub>3</sub> 237.1266, found 237.1270.

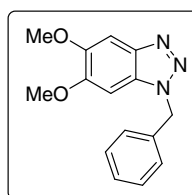

1-Benzyl-5,6-dimethoxy-1*H*-benzo[*d*][1,2,3]triazole (**3c**). Slightly pink solid: mp 130-132 °C; <sup>1</sup>H NMR (CDCl<sub>3</sub>, 300 MHz)  $\delta$  7.22-7.35 (m, 6 H), 6.56 (s, 1 H), 5.77 (s, 2 H), 3.94 (s, 3 H), 3.83 (s, 3 H); <sup>13</sup>C NMR (CDCl<sub>3</sub>, 100 MHz)  $\delta$  151.3, 148.5, 140.7, 134.7, 128.9, 128.3, 128.0, 127.4, 98.9, 89.8, 56.2

(overlapped signal, two  $\text{CH}_3\text{O}$  carbons), 52.1; LRMS (EI) 269 (38), 241 (17), 226 (13), 150 (96), 91 (100); HRMS (EI) calcd for  $\text{C}_{15}\text{H}_{15}\text{N}_3\text{O}_2$  269.1164, found 269.1169.

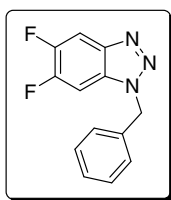

1-Benzyl-5,6-difluoro-1*H*-benzo[*d*][1,2,3]triazole (**3d**). Slightly yellow solid: mp 119-122 °C;  $^1\text{H}$  NMR ( $\text{CDCl}_3$ , 300 MHz)  $\delta$  7.80 (dd,  $J = 9.3, 7.1$  Hz, 1 H), 7.23-7.26 (m, 2 H), 7.33-7.36 (m, 3 H), 7.05 (dd,  $J = 8.6, 6.6$  Hz, 1 H), 5.79 (s, 2 H);  $^{13}\text{C}$  NMR ( $\text{CDCl}_3$ , 100 MHz)  $\delta$  150.8 (dd,  $J = 240, 16$  Hz), 149.0 (dd,  $J = 235, 16$  Hz) [Note: due to partially overlapped peaks, we are not absolutely certain of the assignment of the overlapped signal. Depending on the assignment, one can identify the two peaks as either 150.8 (dd,  $J = 240, 16$  Hz) and 149.0 (dd,  $J = 235, 16$  Hz), or 150.7 (dd,  $J = 253, 16$  Hz) and 149.0 (dd,  $J = 248, 16$  Hz), respectively], 141.5, 141.4, 133.8, 129.2, 128.8, 127.6, 106.5 (dd,  $J = 20, 2$  Hz), 97.1 (d,  $J = 24$  Hz), 52.7; LRMS (EI) 245 (41), 216 (100), 91 (51); HRMS (EI) calcd for  $\text{C}_{13}\text{H}_9\text{F}_2\text{N}_3$  245.0765, found 245.0761.

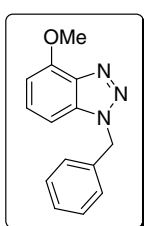

1-Benzyl-4-methoxy-1*H*-benzo[*d*][1,2,3]triazole (**3e**). White solid: mp 92-94 °C;  $^1\text{H}$  NMR ( $\text{CDCl}_3$ , 300 MHz)  $\delta$  7.23-7.32 (m, 6 H), 6.89 (d,  $J = 8.3$  Hz, 1 H), 6.65 (d,  $J = 7.8$  Hz, 1 H), 5.80 (s, 2 H), 4.09 (s, 3 H);  $^{13}\text{C}$  NMR ( $\text{CDCl}_3$ , 100 MHz)  $\delta$  151.7, 138.3, 134.73, 134.70, 128.9, 128.6, 128.3, 127.5, 103.2, 101.8, 56.2, 52.2; LRMS (EI) 239 (27), 210 (21), 195 (19), 180 (51), 167 (100), 139 (17), 91 (17); HRMS (EI) calcd for  $\text{C}_{14}\text{H}_{13}\text{N}_3\text{O}$  239.1059, found 239.1061. The position of the methoxy group was assigned by a 2-D NOESY experiment. The  $\text{CH}_2$  protons show two cross-peaks with two aromatic protons, which can only be explained by placing the methoxy group in the position 4.

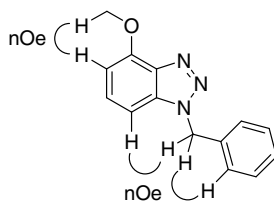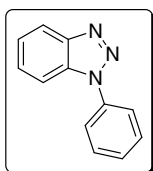

1-Phenyl-1*H*-benzo[*d*][1,2,3]triazole (**3f**). Pale gray solid: mp 86-87 °C;  $^1\text{H}$  NMR ( $\text{CDCl}_3$ , 400 MHz)  $\delta$  8.13 (d,  $J = 8.2$  Hz, 1 H), 7.77 (d,  $J = 8.0$  Hz, 2 H), 7.73 (d,  $J = 8.6$  Hz, 1 H), 7.59 (t,  $J = 7.5$  Hz, 2 H), 7.46-7.54 (m, 2 H), 7.41 (t,  $J = 8.2$  Hz, 1 H);  $^{13}\text{C}$  NMR ( $\text{CDCl}_3$ , 100 MHz)  $\delta$  146.4, 136.9, 132.2, 129.8, 128.6, 128.2, 124.3, 122.8, 122.3, 110.3; LRMS (EI) 195 (31), 167 (100), 138 (18); HRMS (EI) calcd for  $\text{C}_{12}\text{H}_9\text{N}_3$  195.0797, found 195.0800.

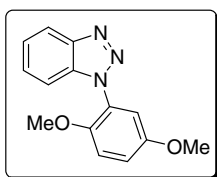

1-(2,5-Dimethoxyphenyl)-1*H*-benzo[*d*][1,2,3]triazole (**3g**). White solid: mp 93-95 °C;  $^1\text{H}$  NMR ( $\text{CDCl}_3$ , 300 MHz)  $\delta$  8.09-8.12 (m, 1 H), 7.35-7.49 (m, 3 H), 7.06-7.09 (m, 3 H);  $^{13}\text{C}$  NMR ( $\text{CDCl}_3$ , 100 MHz)  $\delta$  153.7, 147.6, 145.6, 133.9, 127.6, 125.6, 123.9, 119.8, 116.4, 113.6, 113.2, 111.3, 56.4, 56.0; LRMS (EI) 255 (60), 211 (100), 193 (56), 179 (44), 169 (53); HRMS (EI) calcd for  $\text{C}_{14}\text{H}_{13}\text{N}_3\text{O}_2$  255.1008, found 255.1011.

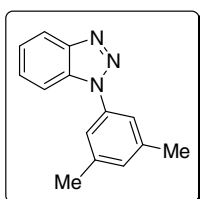

1-(3,5-Dimethylphenyl)-1*H*-benzo[*d*][1,2,3]triazole (**3h**). Slightly yellow oil that solidified upon standing: mp 60-62 °C;  $^1\text{H}$  NMR ( $\text{CDCl}_3$ , 300 MHz)  $\delta$  8.11 (d,  $J = 8.3$  Hz, 1 H), 7.72 (d,  $J = 8.3$  Hz, 1 H), 7.51 (t,  $J = 7.7$  Hz, 1 H), 7.40 (t,  $J = 7.8$  Hz, 1 H), 7.36 (s, 2 H), 7.11 (s, 1 H);  $^{13}\text{C}$  NMR ( $\text{CDCl}_3$ , 100 MHz)  $\delta$  146.4, 139.7, 136.7, 132.3, 130.3, 128.0, 124.2, 120.6, 120.2, 110.5, 21.3; LRMS (EI) 223 (55), 193 (94), 179 (100); HRMS (EI) calcd for  $\text{C}_{14}\text{H}_{13}\text{N}_3$  223.1110, found 223.1114.

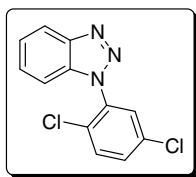

1-(2,5-Dichlorophenyl)-1*H*-benzo[*d*][1,2,3]triazole (**3i**). Slightly orange solid: mp 98-100 °C; <sup>1</sup>H NMR (CDCl<sub>3</sub>, 300 MHz) δ 8.15 (d, *J* = 8.3 Hz, 1 H), 7.36-7.61 (m, 6 H); <sup>13</sup>C NMR (CDCl<sub>3</sub>, 100 MHz) δ 145.6, 134.9, 133.6, 133.4, 131.7, 131.2, 129.3, 129.2, 128.4, 124.5, 120.3, 110.4; LRMS (EI) 263 (40), 234 (43), 199 (100), 163 (18); HRMS (EI) calcd for C<sub>12</sub>H<sub>17</sub>Cl<sub>2</sub>N<sub>3</sub> 263.0017, found 263.0022.

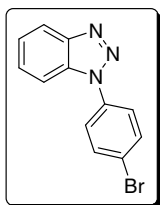

1-(4-Bromophenyl)-1*H*-benzo[*d*][1,2,3]triazole (**3j**). White solid: mp 154-156 °C; <sup>1</sup>H NMR (CDCl<sub>3</sub>, 300 MHz) δ 8.14 (d, *J* = 8.3 Hz, 1 H), 7.66-7.75 (m, 5 H), 7.56 (ddd, *J* = 8.1, 7.1, 1.0 Hz, 1 H), 7.44 (ddd, *J* = 8.3, 7.1, 1.2 Hz, 1 H); <sup>13</sup>C NMR (CDCl<sub>3</sub>, 100 MHz) δ 146.6, 136.0, 133.0, 132.0, 128.5, 124.6, 124.2, 122.3, 120.5, 110.1; LRMS (EI) 272 (6), 166 (100), 138 (20); HRMS (EI) calcd for C<sub>12</sub>H<sub>8</sub>BrN<sub>3</sub> 272.9902, found 272.9907.

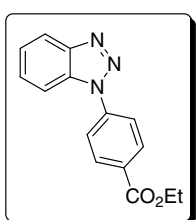

Ethyl 4-(1*H*-benzo[*d*][1,2,3]triazol-1-yl)benzoate (**3k**). White solid: mp 87-88 °C; <sup>1</sup>H NMR (CDCl<sub>3</sub>, 300 MHz) δ 8.26-8.29 (m, 2 H), 8.15 (d, *J* = 8.3 Hz, 1 H), 7.89-7.92 (m, 2 H), 7.79 (d, *J* = 8.5 Hz, 1 H), 7.58 (ddd, *J* = 8.0, 7.1, 1.0 Hz, 1 H), 7.45 (t, *J* = 8.0 Hz, 1 H), 4.42 (q, *J* = 7.1 Hz, 2 H), 1.42 (t, *J* = 7.1 Hz, 3 H); <sup>13</sup>C NMR (CDCl<sub>3</sub>, 100 MHz) δ 165.5, 146.7, 140.4, 131.9, 131.3, 130.3, 128.7, 124.7, 121.9, 120.6, 110.3, 61.4, 14.3; LRMS (EI) 267 (16), 211 (44), 180 (32), 166 (100), 140 (17); HRMS (EI) calcd for C<sub>15</sub>H<sub>13</sub>N<sub>3</sub>O<sub>2</sub> 267.1008, found 267.0999.

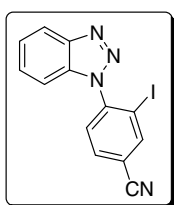

4-(1*H*-Benzo[*d*][1,2,3]triazol-1-yl)-3-iodobenzonitrile (**3l**). Yellow to pink solid: mp 152-154 °C; <sup>1</sup>H NMR (CDCl<sub>3</sub>, 400 MHz) δ 8.37 (d, *J* = 1.6 Hz, 1 H), 8.17 (d, *J* = 8.4 Hz, 1 H), 7.87 (dd, *J* = 8.1, 1.8 Hz, 1 H), 7.54-7.58 (m, 2 H), 7.45-7.49 (ddd, *J* = 7.9, 7.0, 0.9 Hz, 1 H), 7.33 (d, *J* = 8.2 Hz, 1 H); <sup>13</sup>C NMR (CDCl<sub>3</sub>, 100 MHz) δ 145.8, 143.8, 143.0, 132.9, 132.8, 129.1, 128.8, 124.7, 120.5, 116.0, 115.5, 110.2, 95.5; LRMS (EI) 346 (10), 191 (100), 164 (23), 149 (12); HRMS (EI) calcd for C<sub>13</sub>H<sub>7</sub>IN<sub>4</sub> 345.9715, found 345.9724.

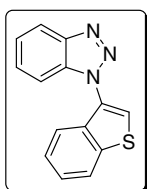

1-(Benzo[*b*]thiophen-3-yl)-1*H*-benzo[*d*][1,2,3]triazole (**3m**). White solid: mp 132-134 °C; <sup>1</sup>H NMR (CDCl<sub>3</sub>, 300 MHz) δ 8.18 (dt, *J* = 8.3, 1.0 Hz, 1 H), 7.95 (m, 1 H), 7.76-7.80 (m, 1 H), 7.76 (s, 1 H), 7.40-7.60 (m, 6 H); <sup>13</sup>C NMR (CDCl<sub>3</sub>, 100 MHz) δ 145.7, 138.9, 133.44, 133.40, 129.2, 128.3, 125.8, 125.3, 124.5, 123.1, 122.2, 121.0, 120.3, 110.3; LRMS (EI) 251 (23), 222 (100), 194 (42), 180 (43), 121 (36), 88 (39); HRMS (EI) calcd for C<sub>14</sub>H<sub>9</sub>SN<sub>3</sub> 251.0517, found 251.0521.

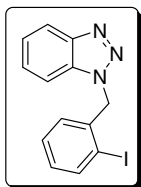

1-(2-Iodobenzyl)-1*H*-benzo[*d*][1,2,3]triazole (**3n**). White solid: mp 97-98 °C; <sup>1</sup>H NMR (CDCl<sub>3</sub>, 300 MHz) δ 8.08 (dd, *J* = 8.1, 1.2 Hz, 1 H), 7.89 (dd, *J* = 7.8, 1.0 Hz, 1 H), 7.33-7.45 (m, 3 H), 7.20 (td, *J* = 7.6, 1.2 Hz, 1 H), 6.99 (td, *J* = 7.8, 1.7 Hz, 1 H), 6.76 (dd, *J* = 7.8, 1.8 Hz, 1 H), 5.90 (s, 2 H); <sup>13</sup>C NMR (CDCl<sub>3</sub>, 100 MHz) δ 146.1, 139.7, 137.1, 132.9, 130.0, 128.8, 128.4, 127.6, 124.0, 120.1, 109.8, 97.6, 56.6; LRMS (EI) 335 (14), 217 (23), 208 (100), 180 (50), 152 (19), 90 (41); HRMS (EI) calcd for C<sub>13</sub>H<sub>10</sub>IN<sub>3</sub> 334.9919, found 334.9924.

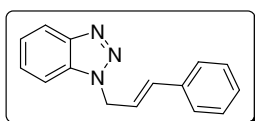

1-Cinnamyl-1*H*-benzo[*d*][1,2,3]triazole (**3o**). White solid: mp 72-73 °C; *R<sub>f</sub>* 0.40 (2.5:1 hexanes/ EtOAc); <sup>1</sup>H NMR (CDCl<sub>3</sub>, 400 MHz) δ 8.07 (dt, *J* = 8.2, 0.9 Hz, 1 H), 7.55 (dt, *J* = 8.2, 0.9 Hz, 1 H), 7.45 (ddd, *J* = 8.0, 7.0, 0.9 Hz, 1 H), 7.24-7.38 (m, 6 H), 6.67 (d, *J* = 15.7 Hz, 1 H), 6.39 (dt, *J* = 15.9, 6.3 Hz, 1 H), 5.44 (dd, *J* = 8.2, 6.4 Hz, 2 H); <sup>13</sup>C NMR (CDCl<sub>3</sub>, 100 MHz) δ 146.3, 135.5,

134.4, 132.9, 128.7, 128.4, 127.4, 126.6, 123.9, 122.2, 120.1, 109.7, 50.6; LRMS (EI) 235 (17), 206 (39), 130 (20), 115(100), 104 (21), 91 (61); HRMS (EI) calcd for C<sub>15</sub>H<sub>13</sub>N<sub>3</sub> 235.1109, found 235.1114.

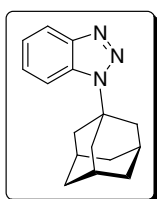

1-Adamantyl-1*H*-benzo[*d*][1,2,3]triazole (**3p**). White solid: mp 149-151 °C; <sup>1</sup>H NMR (CDCl<sub>3</sub>, 400 MHz) δ 8.05 (d, *J* = 8.4 Hz, 1 H), 7.79 (d, *J* = 8.4 Hz, 1 H), 7.39 (td, *J* = 7.7, 1.1 Hz, 1 H), 7.30 (td, *J* = 7.6, 0.9 Hz, 1 H), 2.50 (d, *J* = 2.8 Hz, 6 H), 2.31 (brs, 3 H), 1.85 (brs, 6 H); <sup>13</sup>C NMR (CDCl<sub>3</sub>, 100 MHz) δ 147.0, 131.6, 126.1, 123.2, 120.3, 112.3, 61.5, 42.1, 36.1, 29.6; LRMS (EI) 253 (100), 224 (48), 182 (22), 168 (20), 146 (32), 135 (49), 93 (34), 91 (39), 79 (41), 77 (41); HRMS (EI) calcd for C<sub>16</sub>H<sub>19</sub>N<sub>3</sub> 253.1579, found 253.1570.

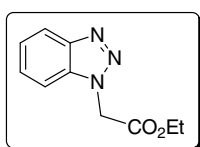

Ethyl 2-(1*H*-benzo[*d*][1,2,3]triazol-1-yl)acetate (**3q**). Slightly yellow solid: mp 76-78 °C; <sup>1</sup>H NMR (CDCl<sub>3</sub>, 400 MHz) δ 8.07 (d, *J* = 8.5 Hz, 1 H), 7.44-7.52 (m, 2 H), 7.38 (ddd, *J* = 8.1, 6.8, 1.1 Hz, 1 H), 5.40 (s, 2 H), 4.24 (q, *J* = 7.1 Hz, 2 H), 1.25 (t, *J* = 7.1 Hz, 1 H); <sup>13</sup>C NMR (CDCl<sub>3</sub>, 100 MHz) δ 166.3, 146.0, 133.3, 127.9, 124.1, 120.2, 109.2, 62.3, 49.1, 14.1; LRMS (EI) 205 (24), 132 (32), 104 (45), 77 (100); HRMS (EI) calcd for C<sub>10</sub>H<sub>11</sub>N<sub>3</sub>O<sub>2</sub> 205.0851, found 205.0856.

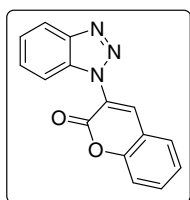

3-(1*H*-Benzo[*d*][1,2,3]triazol-1-yl)coumarin (**3r**). Slightly yellow solid: mp 197-199 °C; <sup>1</sup>H NMR (CDCl<sub>3</sub>, 300 MHz) δ 8.12 (d, *J* = 8.5 Hz, 1 H), 7.39-7.70 (m, 8 H); <sup>13</sup>C NMR (CDCl<sub>3</sub>, 100 MHz) δ 156.2, 153.3, 146.3, 138.4, 133.1, 132.9, 128.9, 128.5, 125.5, 124.6, 123.8, 120.1, 118.2, 116.9, 112.1; LRMS (EI) 263 (49), 235 (100), 206 (54), 178 (57), 153 (31), 89(76); HRMS (EI) calcd for C<sub>15</sub>H<sub>9</sub>N<sub>3</sub>O<sub>2</sub> 263.0695, found 263.0699.

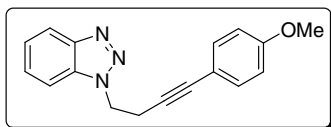

1-(4-(4-Methoxyphenyl)but-3-ynyl)-1*H*-benzo[*d*][1,2,3]triazole (**3s**). Yellow oil: <sup>1</sup>H NMR (CDCl<sub>3</sub>, 300 MHz) δ 8.05 (dt, *J* = 8.3, 1.0 Hz, 1 H), 7.63 (dt, *J* = 8.3, 1.0 Hz, 1 H), 7.46 (ddd, *J* = 8.1, 6.8, 1.0 Hz, 1 H), 7.35 (ddd, *J* = 8.0, 6.8, 1.0 Hz, 1 H), 7.11-7.15 (m, 2 H), 6.74-6.78 (m, 2 H), 4.85 (t, *J* = 6.8 Hz, 2 H), 3.76 (s, 3 H), 3.08 (t, *J* = 6.8 Hz, 2 H); <sup>13</sup>C NMR (CDCl<sub>3</sub>, 100 MHz) δ 159.4, 145.9, 133.2, 132.8, 127.3, 123.9, 120.0, 114.8, 113.8, 109.6, 83.6, 83.1, 55.3, 47.0, 21.4; LRMS (EI) 102 (27), 77 (100); HRMS (EI) calcd for C<sub>17</sub>H<sub>15</sub>N<sub>3</sub>O 277.1215, found 277.1221.

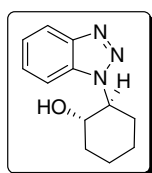

2-(1*H*-Benzo[*d*][1,2,3]triazol-1-yl)cyclohexanol (**3t**). White solid: mp 126-128 °C; <sup>1</sup>H NMR (CDCl<sub>3</sub>, 300 MHz) δ 7.59-7.63 (m, 1 H), 7.54 (dt, *J* = 8.5, 0.8 Hz, 1 H), 7.38 (ddd, *J* = 7.8, 6.8, 1.0 Hz, 1 H), 7.16 (ddd, *J* = 8.3, 6.8, 1.0 Hz, 1 H), 4.35-4.40 (m, 2 H), 3.74 (s, 1 H), 2.11-2.28 (m, 3 H), 1.88-1.91 (m, 2 H), 1.45-1.58 (m, 3 H); <sup>13</sup>C NMR (CDCl<sub>3</sub>, 100 MHz) δ 145.1, 133.5, 126.9, 123.9, 119.1, 109.8, 72.4, 65.3, 34.0, 31.4, 25.1, 24.2; LRMS (EI) 132 (37), 91 (36), 76 (100); HRMS (EI) calcd for C<sub>12</sub>H<sub>15</sub>N<sub>3</sub>O 217.1215, found 217.1218.

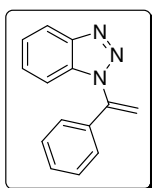

1-(1-Phenylvinyl)-1*H*-benzo[*d*][1,2,3]triazole (**3u**). Slightly orange glass: *R<sub>f</sub>* 0.46 (4:1 hexanes/EtOAc); <sup>1</sup>H NMR (CDCl<sub>3</sub>, 400 MHz) δ 8.09-8.11 (m, 1 H), 7.34-7.42 (m, 5 H), 7.27-7.29 (m, 2 H), 7.03-7.05 (m, 1 H), 5.77 (d, *J* = 8.4 Hz, 2 H); <sup>13</sup>C NMR (CDCl<sub>3</sub>, 100 MHz) δ 146.1, 142.6, 134.6, 132.9, 129.8, 128.8, 127.8, 126.9, 124.1, 120.1, 111.2, 111.1; LRMS (EI) 221 (39), 193 (100), 191 (98), 165 (56), 103 (59); HRMS (EI) calcd for C<sub>14</sub>H<sub>11</sub>N<sub>3</sub> 221.0953, found 221.0955.



## References:

1. (a) Peña, D.; Pérez, D.; Guitián, E.; Castedo, L. *J. Am. Chem. Soc.* **1999**, *121*, 5827. (b) Peña, D.; Pérez, D.; Guitián, E.; Castedo, L. *J. Org. Chem.* **2000**, *65*, 6944. (c) Yoshida, H.; Sugiura, S.; Kunai, A. *Org. Lett.* **2002**, *4*, 2767. (d) Liu, Z.; Zhang, X.; Larock, R. C. *J. Am. Chem. Soc.* **2005**, *127*, 15716. (e) Peña, D.; Escudero, S.; Pérez, D.; Guitián, E.; Castedo, L. *Angew. Chem., Int. Ed.* **1998**, *37*, 2659. (f) Yoshida, H.; Ikadai, J.; Shudo, M.; Ohshita, J.; Kunai, A. *J. Am. Chem. Soc.* **2003**, *125*, 6638.
2. Tao, C.-Z.; Cui, X.; Li, J.; Liu, A.-X.; Liu L.; Guo, Q.-X. *Tetrahedron Lett.* **2007**, *48*, 3525.
3. Barral, K.; Moorhouse, A. D.; Moses, J. E. *Org. Lett.* **2007**, *9*, 1809.
4. Azide **1b** has also been prepared using this method.
5. Sá, M. M.; Ramos, M. D.; Fernandes, L. *Tetrahedron* **2006**, *62*, 11652.
6. Azide **1j** may also be prepared using this method.
7. Chowdhury, C.; Mandal S. B.; Achari, B. *Tetrahedron Lett.* **2005**, *46*, 8531.
8. Sivakumar, K.; Xie, F.; Cash, B. M.; Long, S.; Barnhill, H. N.; Wang, Q. *Org. Lett.* **2004**, *6*, 4603.
9. Higuchi, Y.; Ito, K.; Tame, C. *Heterocycles* **1993**, *35*, 937.
10. Chatterjee, A.; Sasikumar, M.; Joshi, N. N. *Synth. Commun.* **2007**, *37*, 1727.

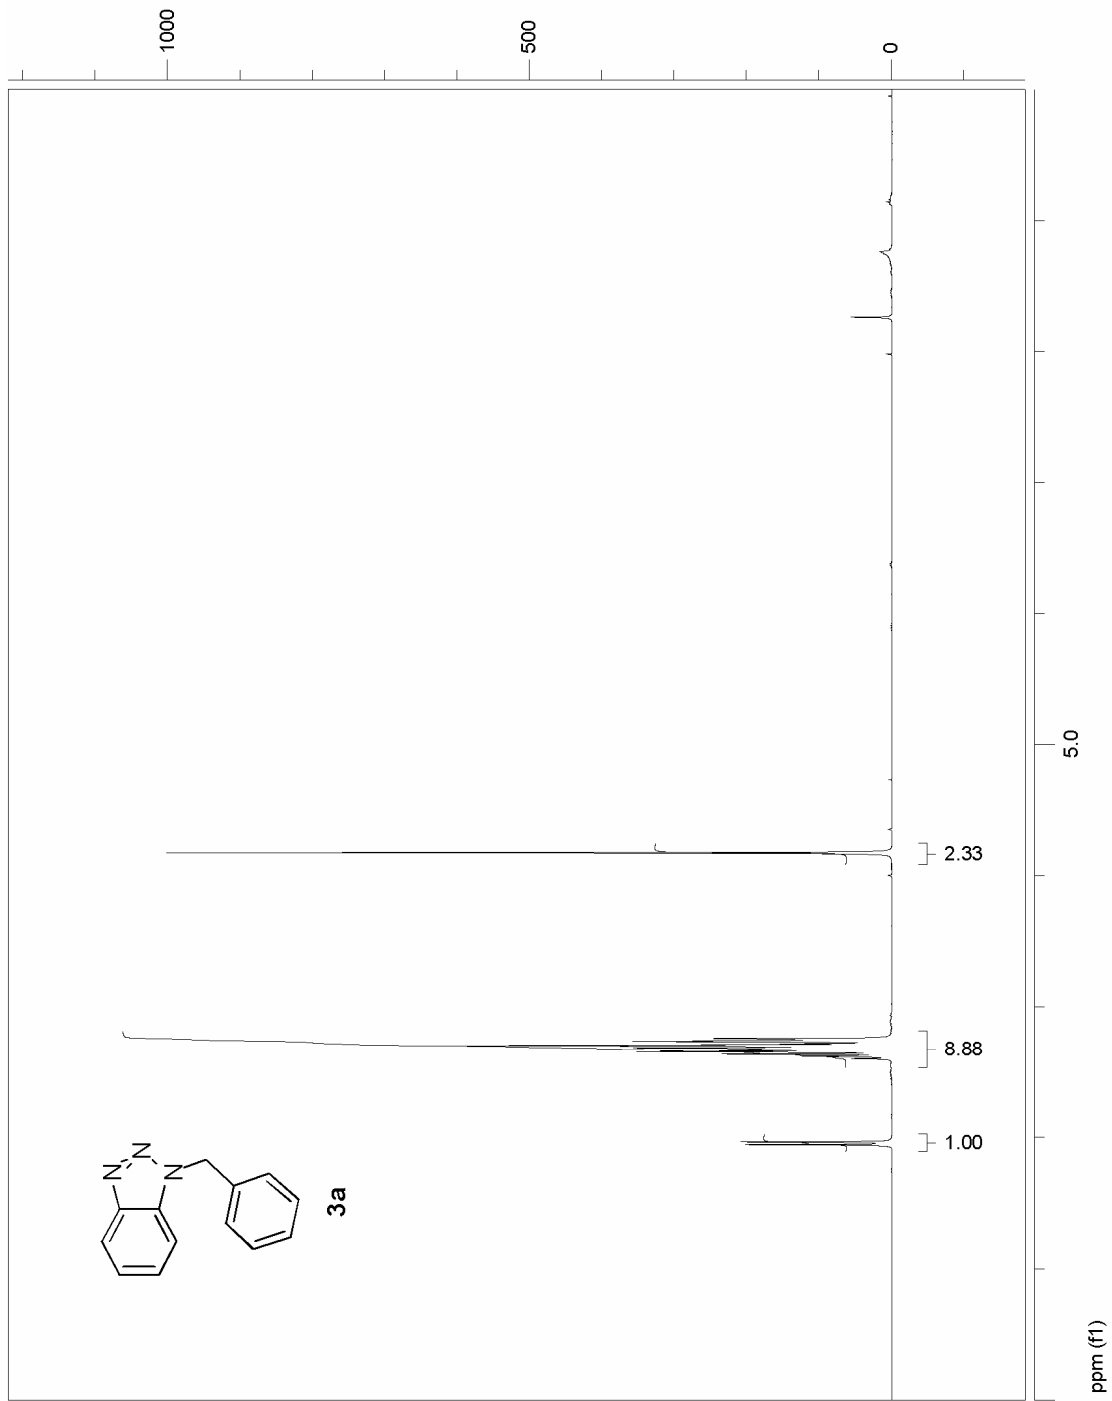

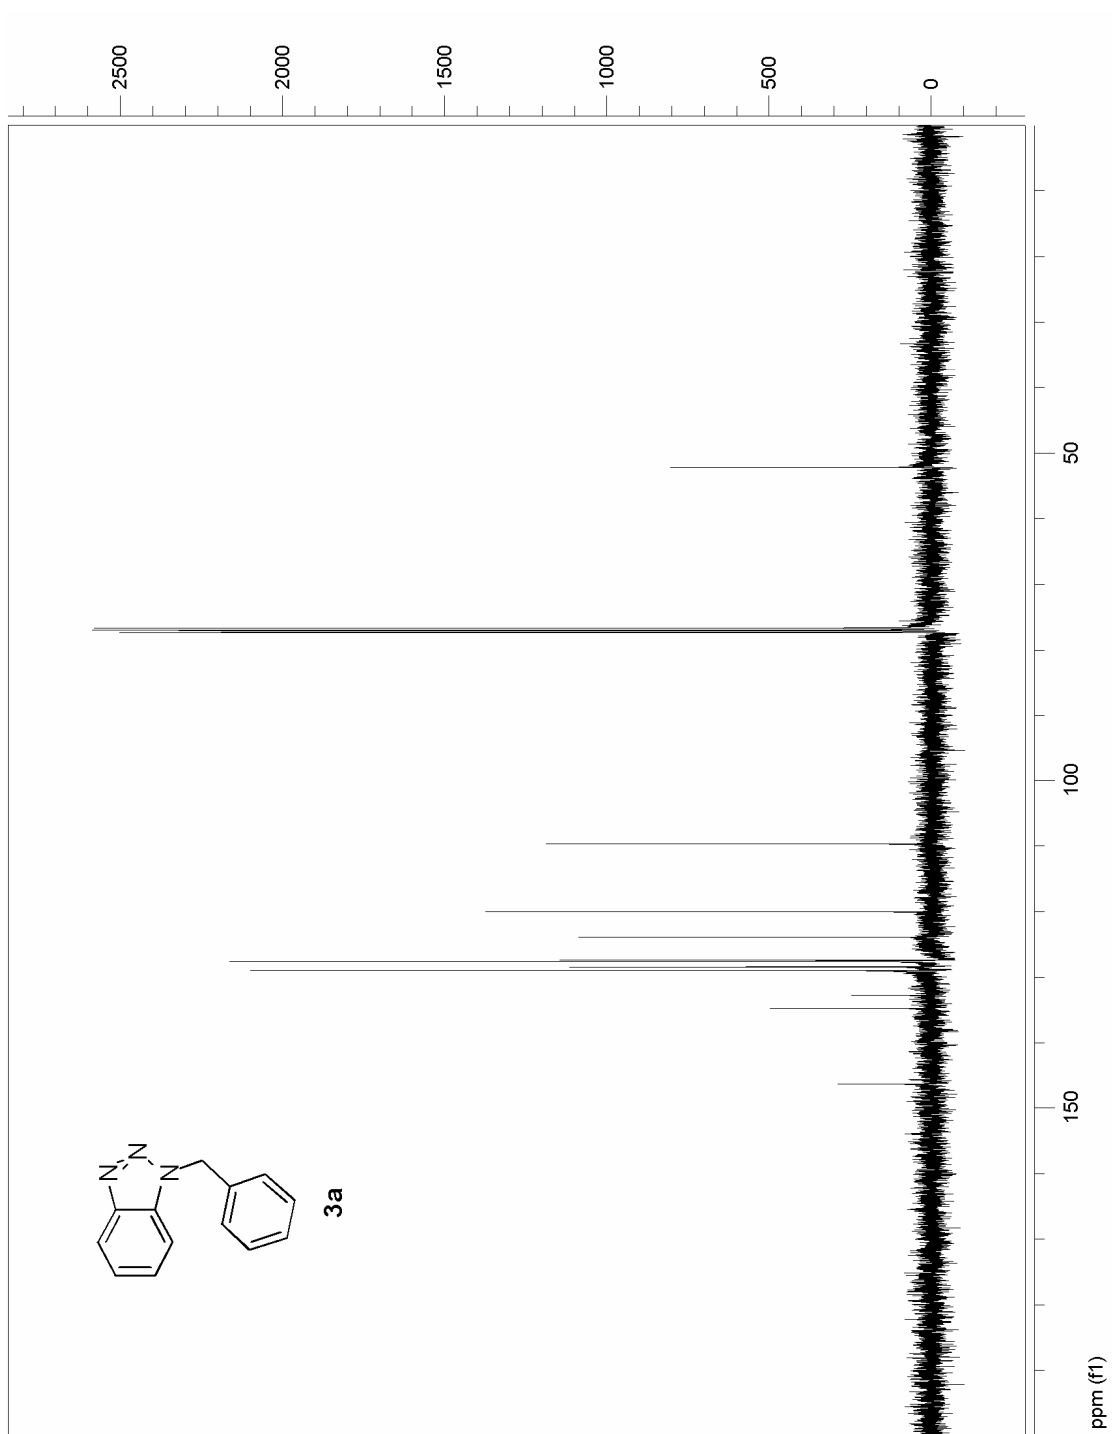

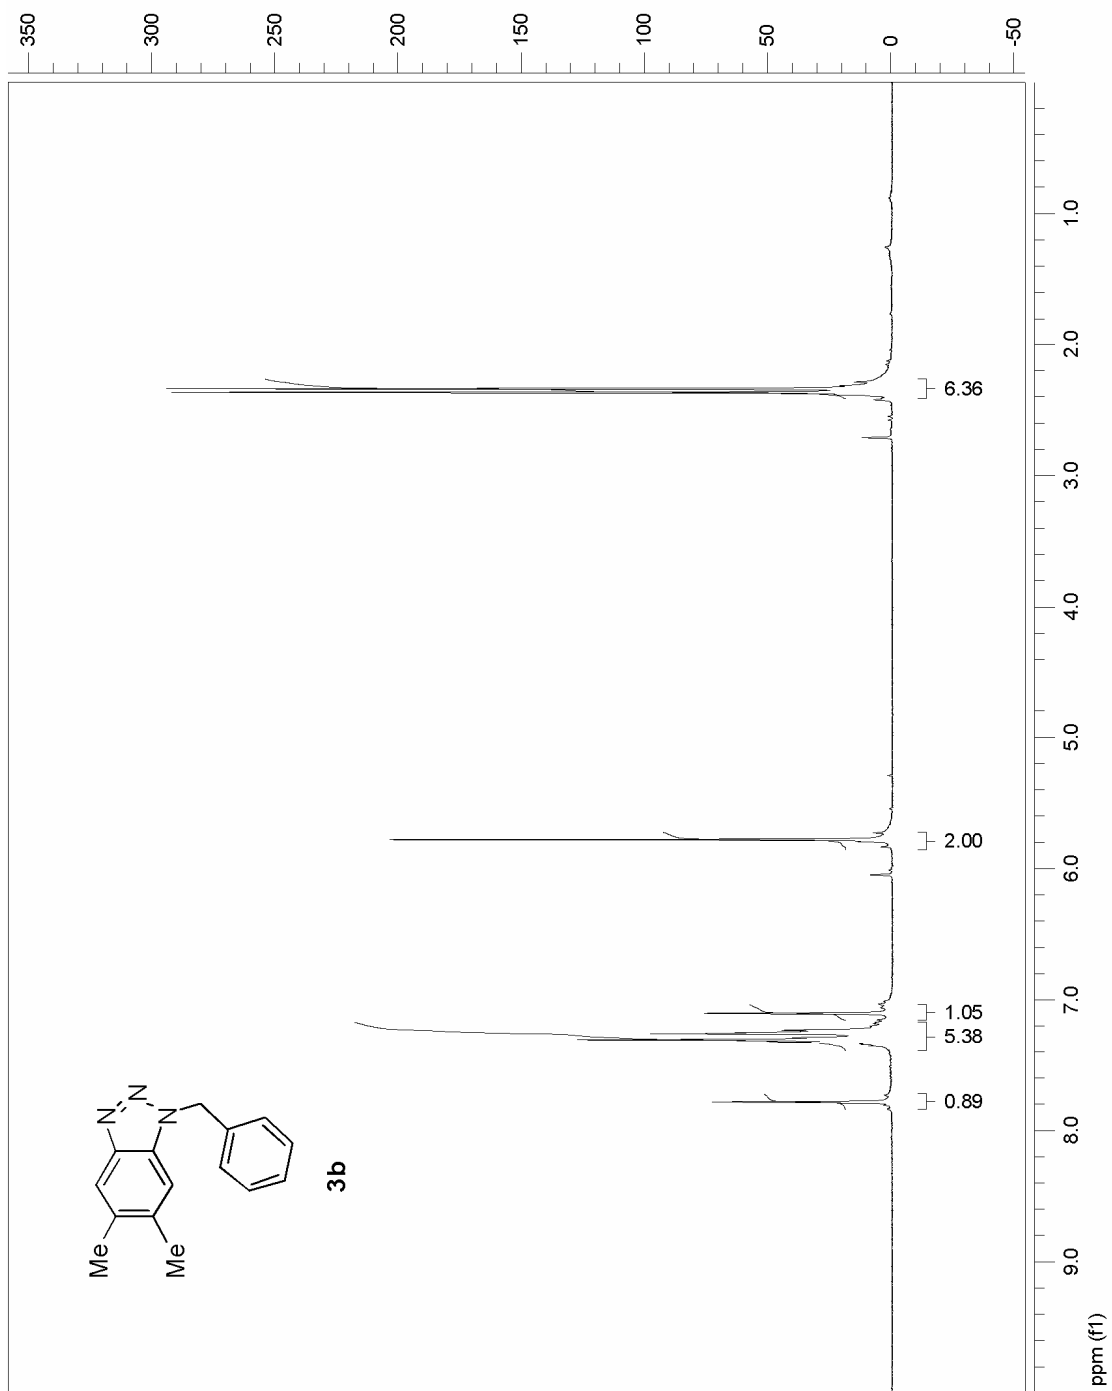

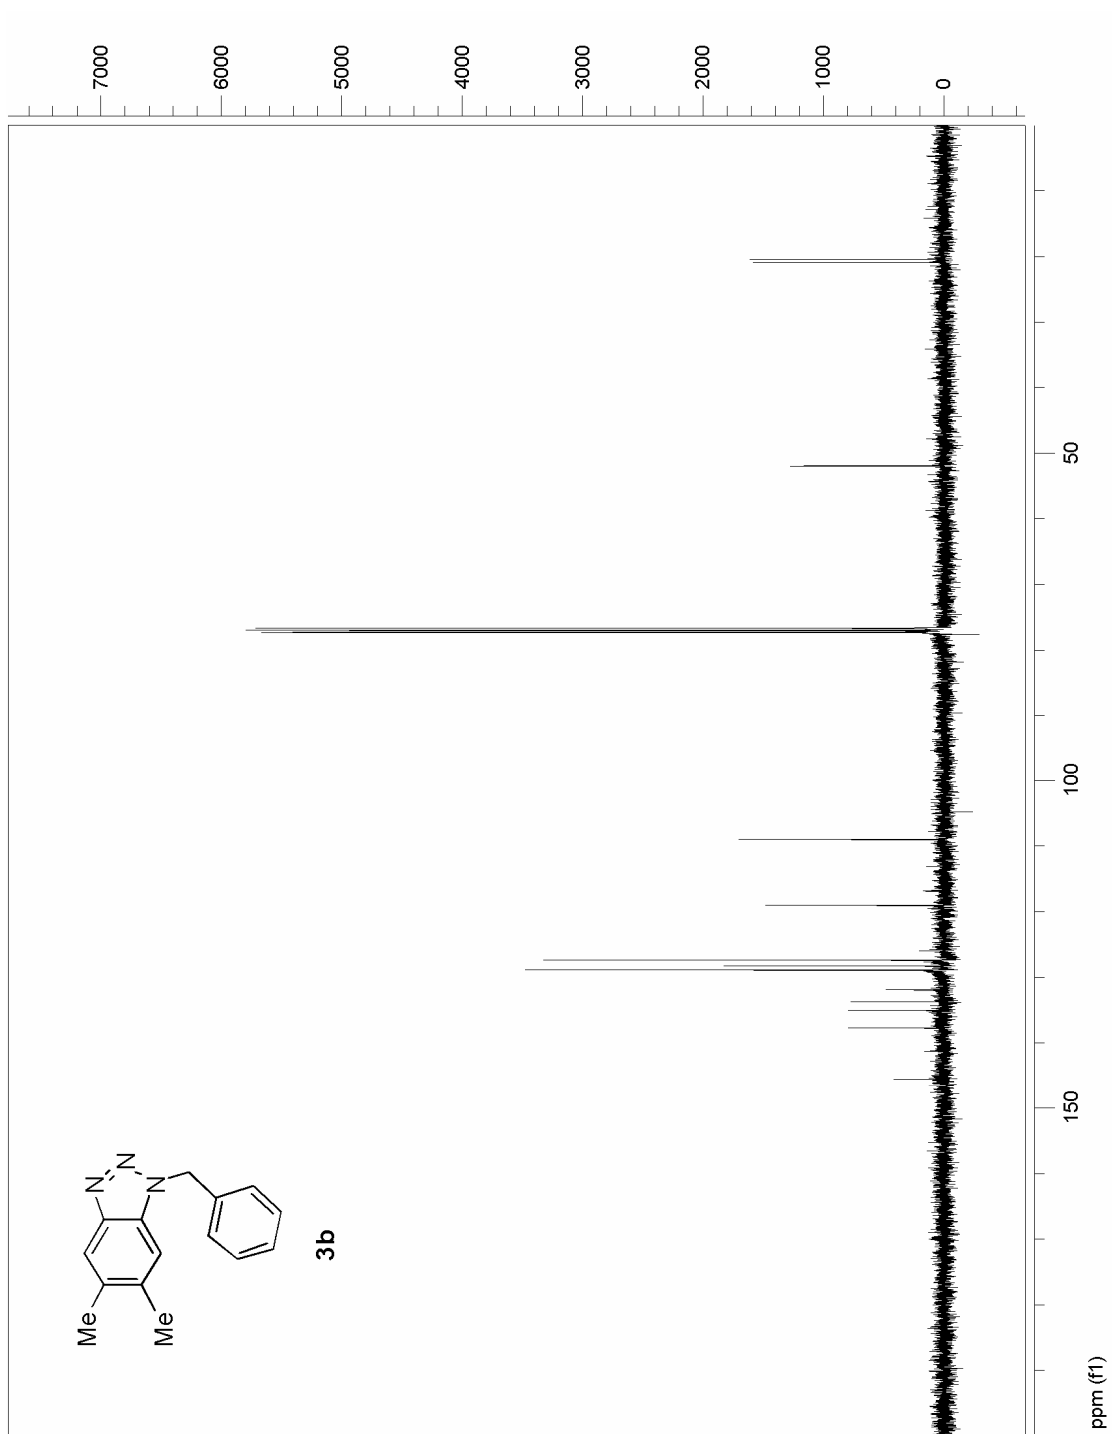

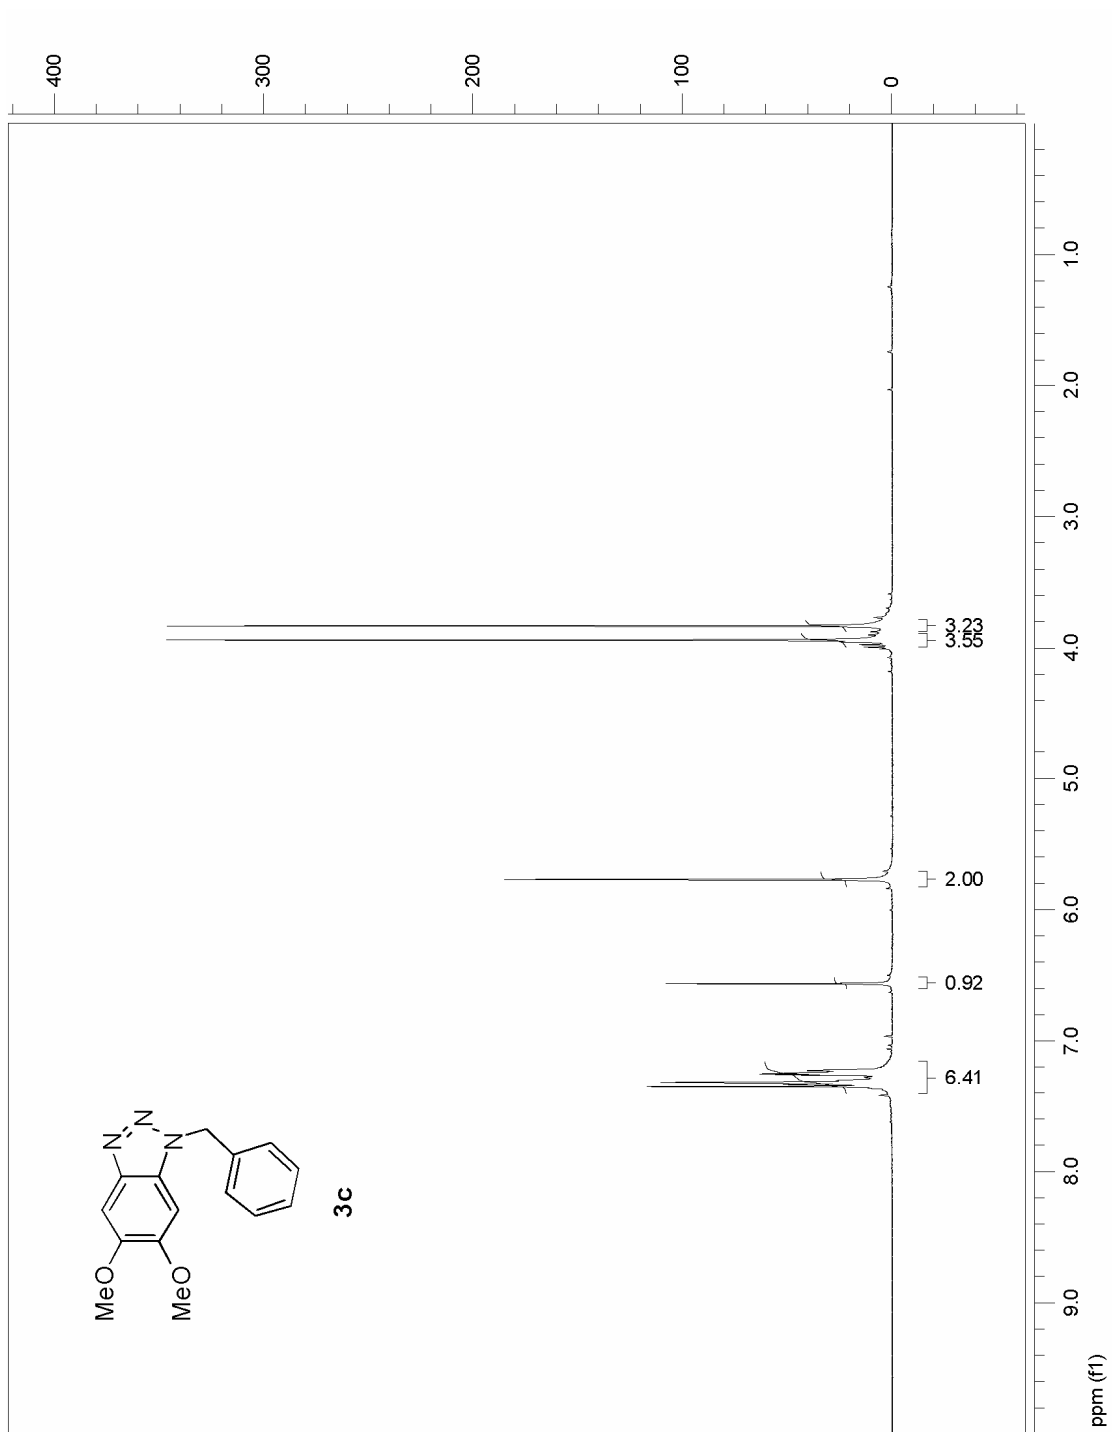

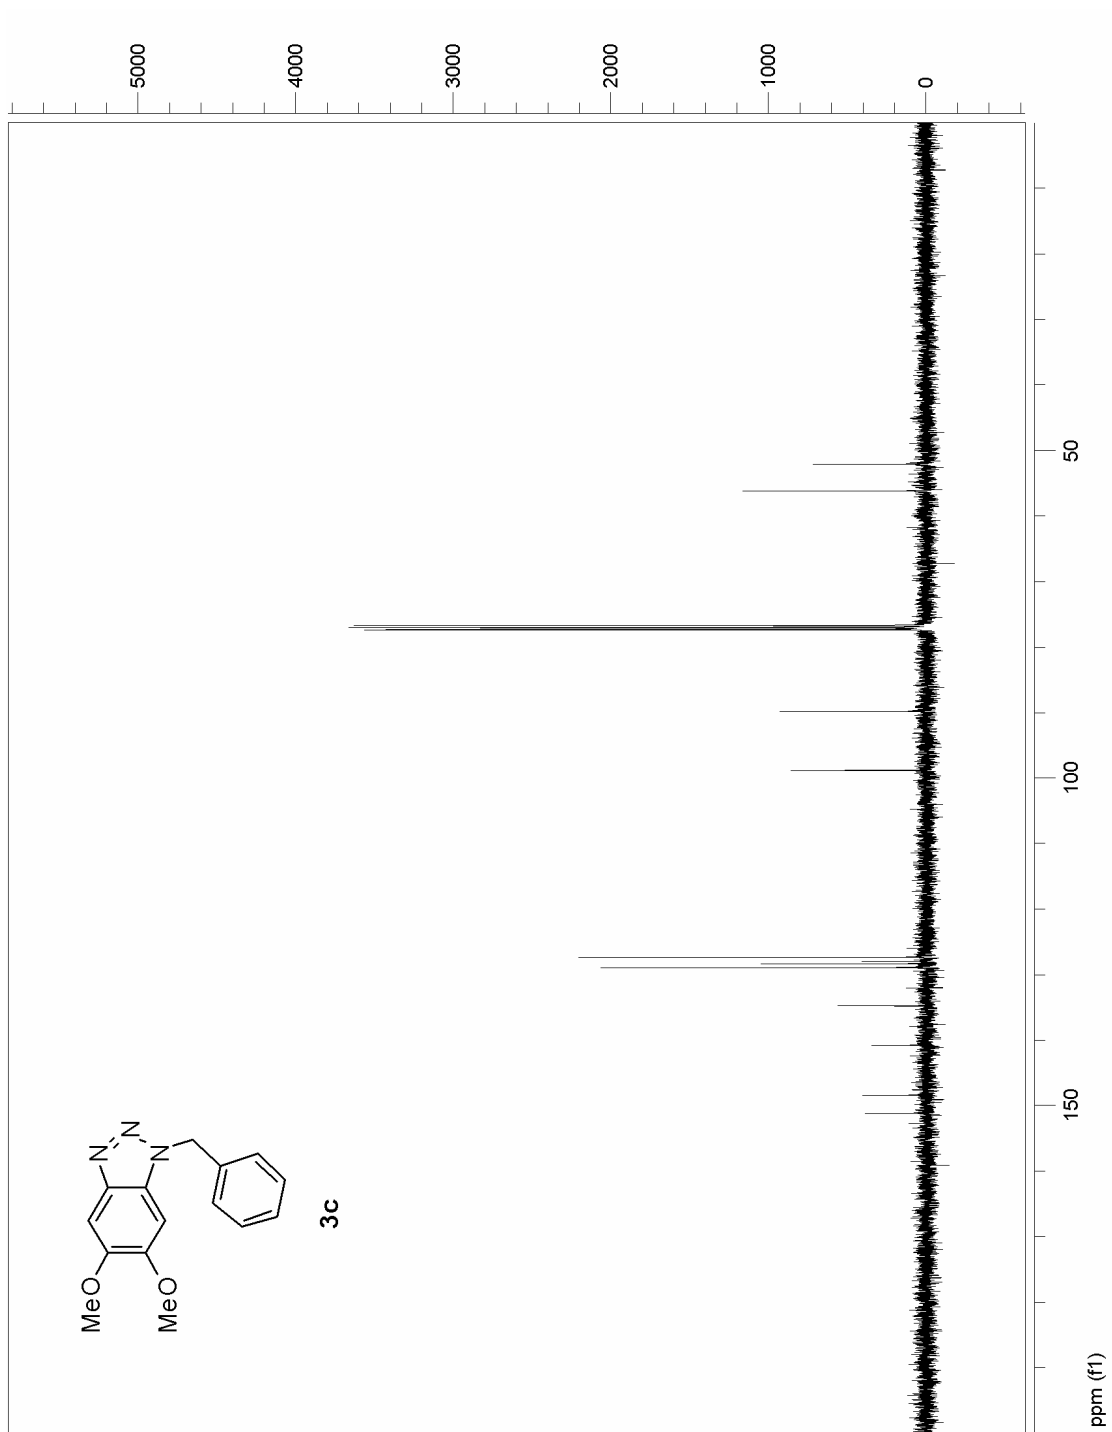

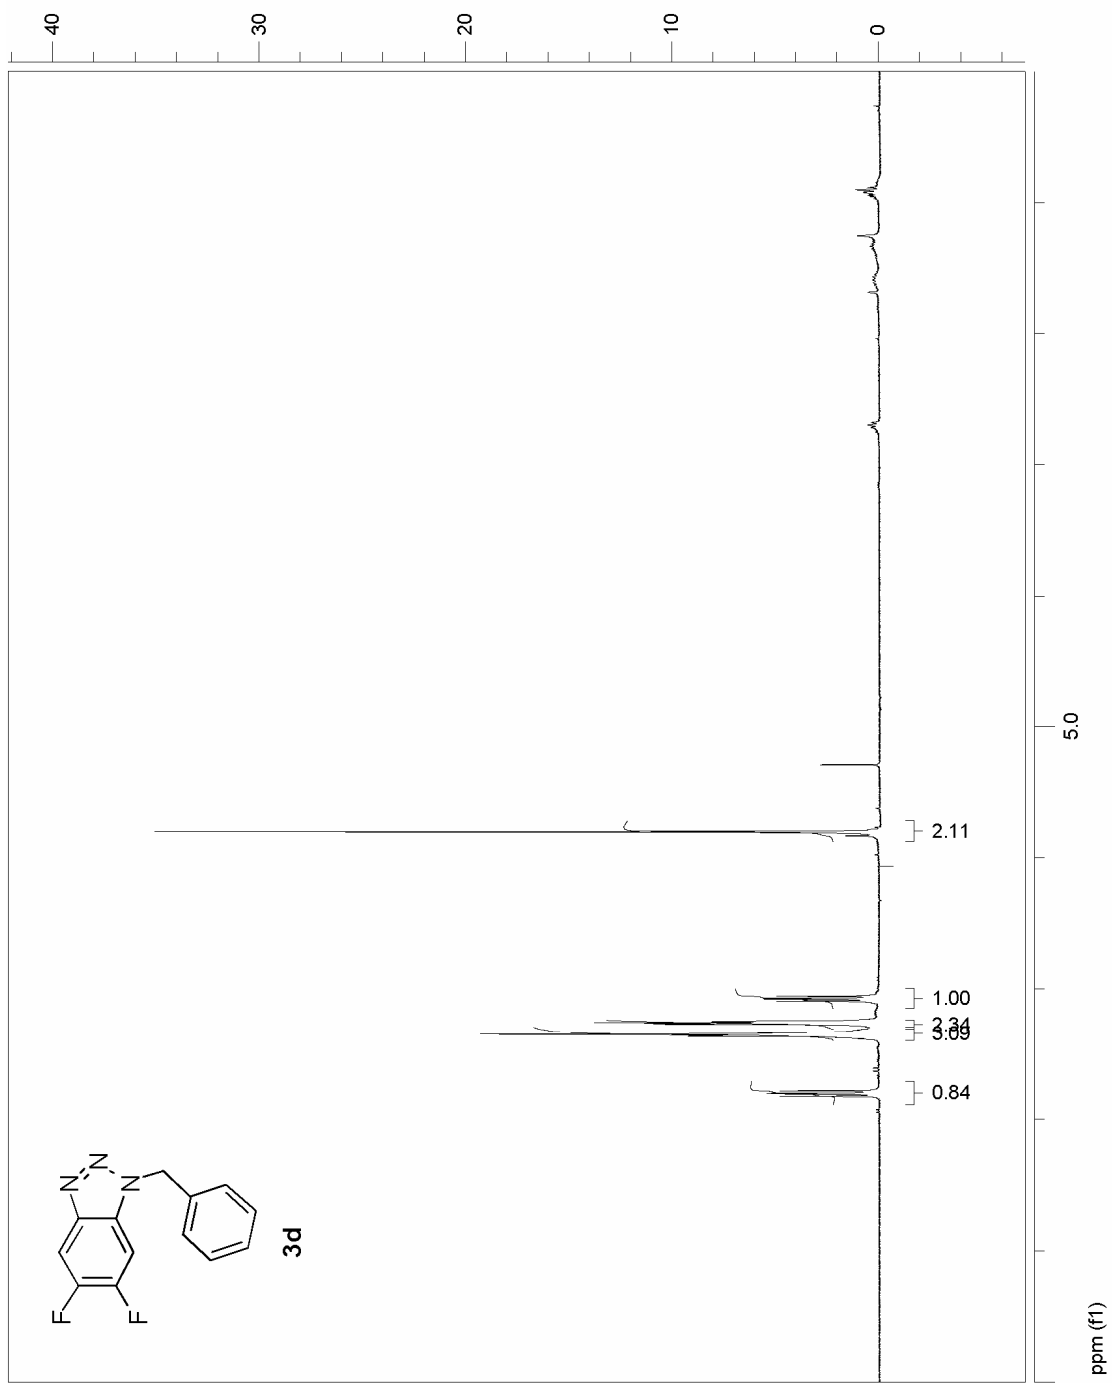



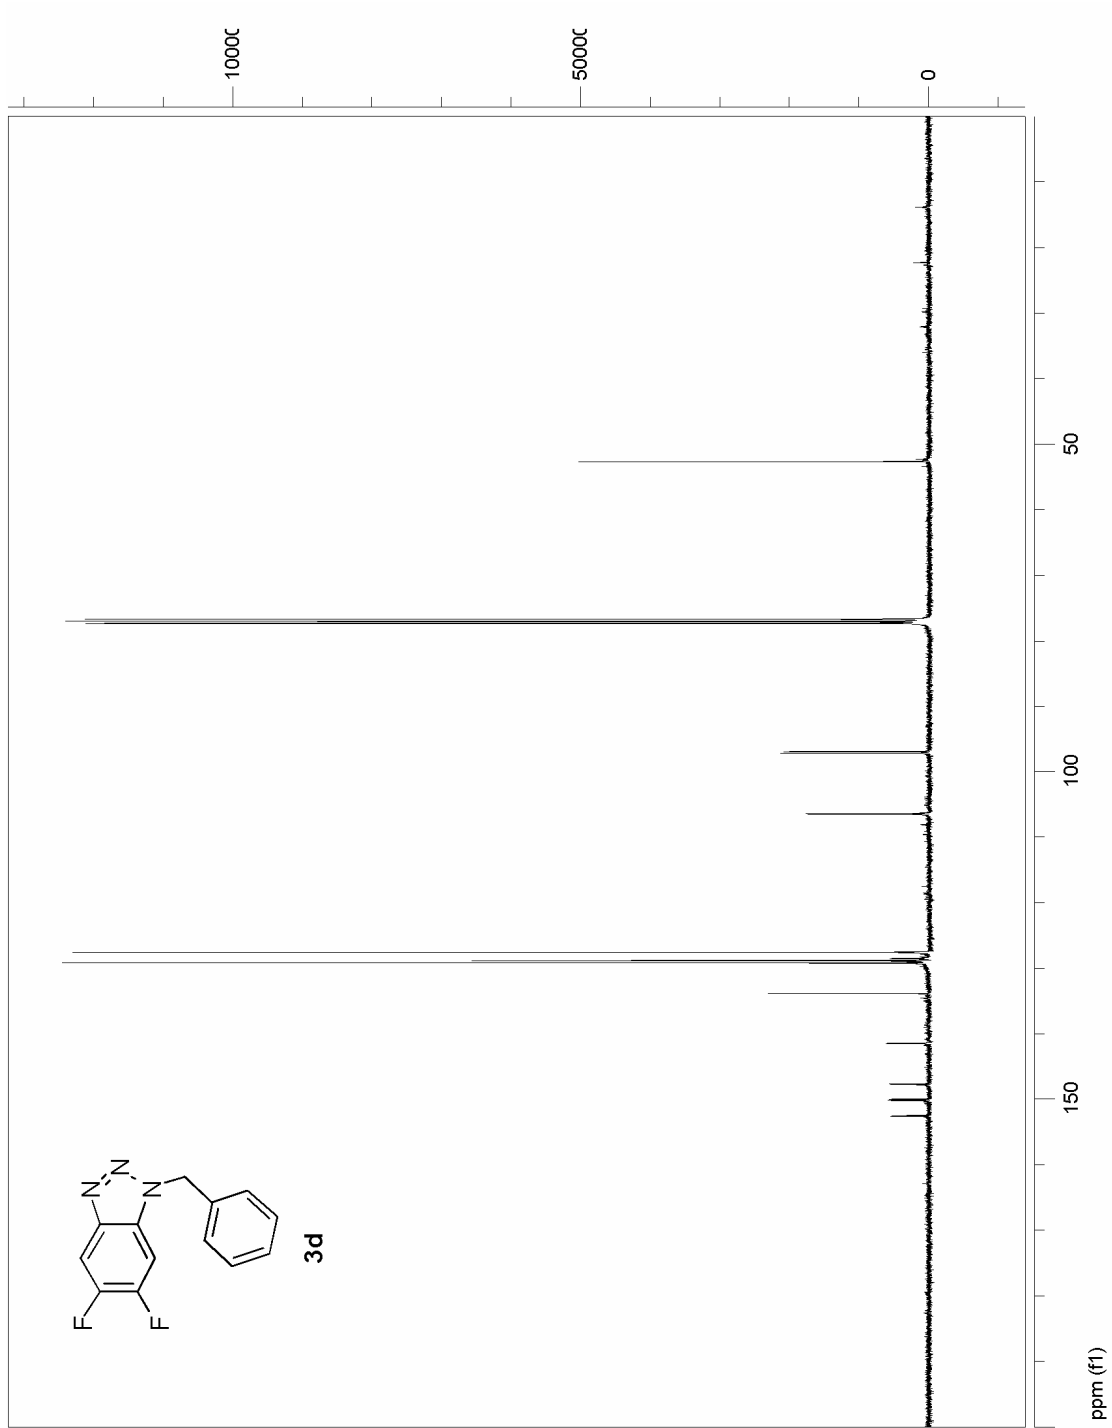

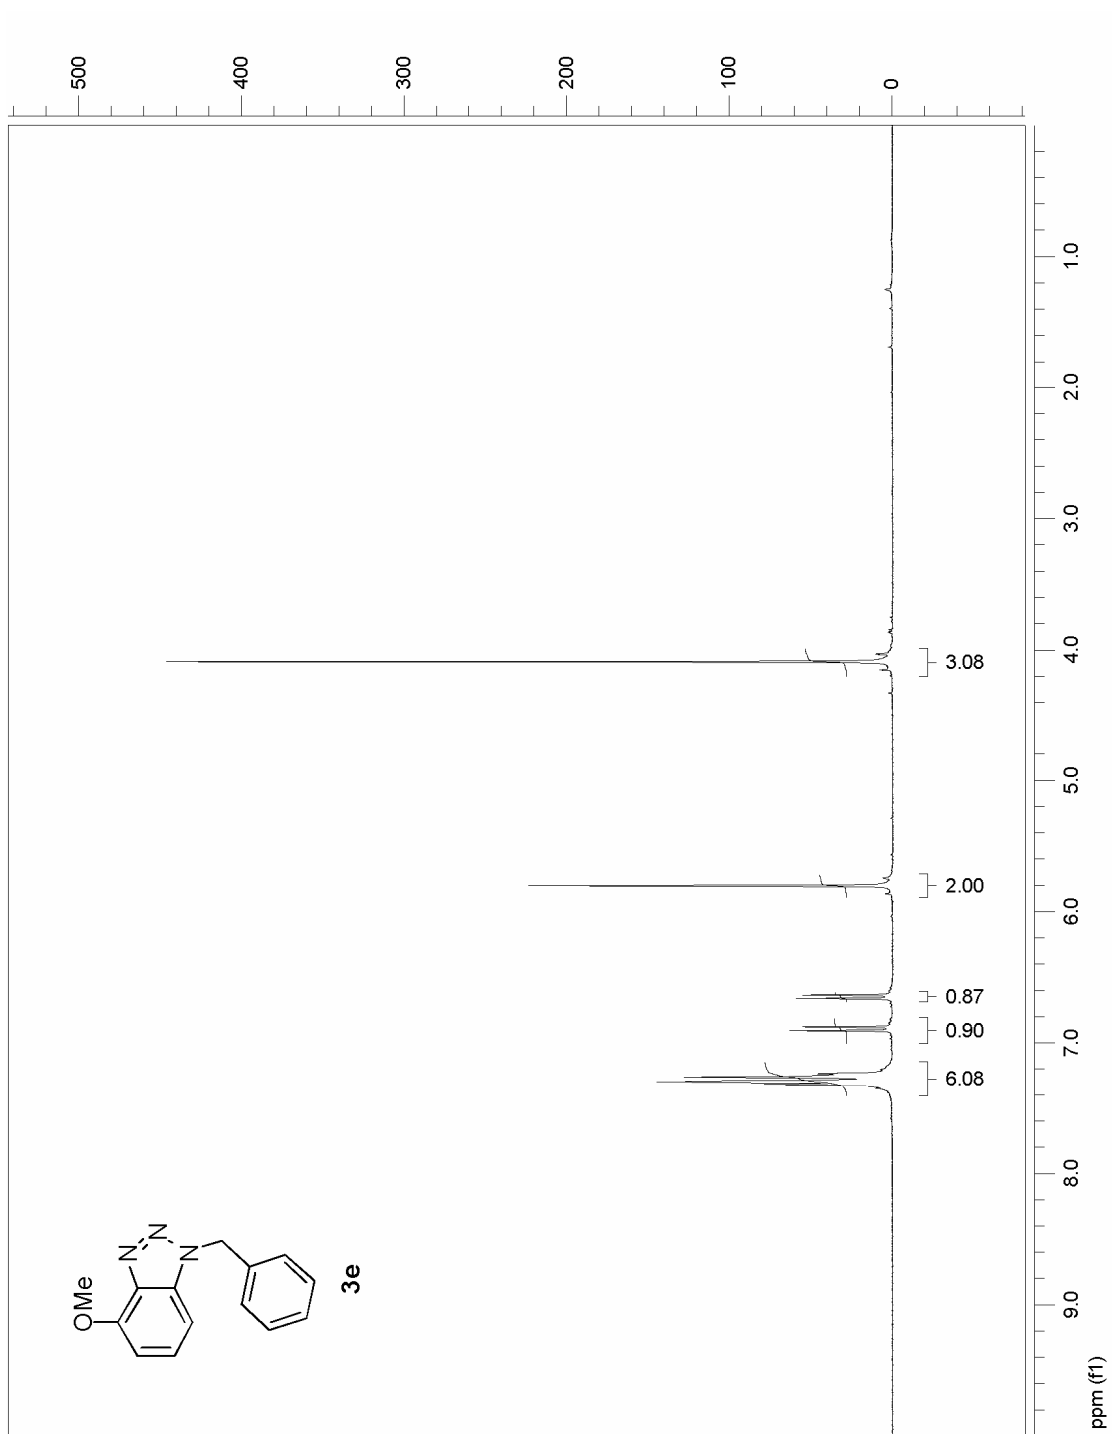

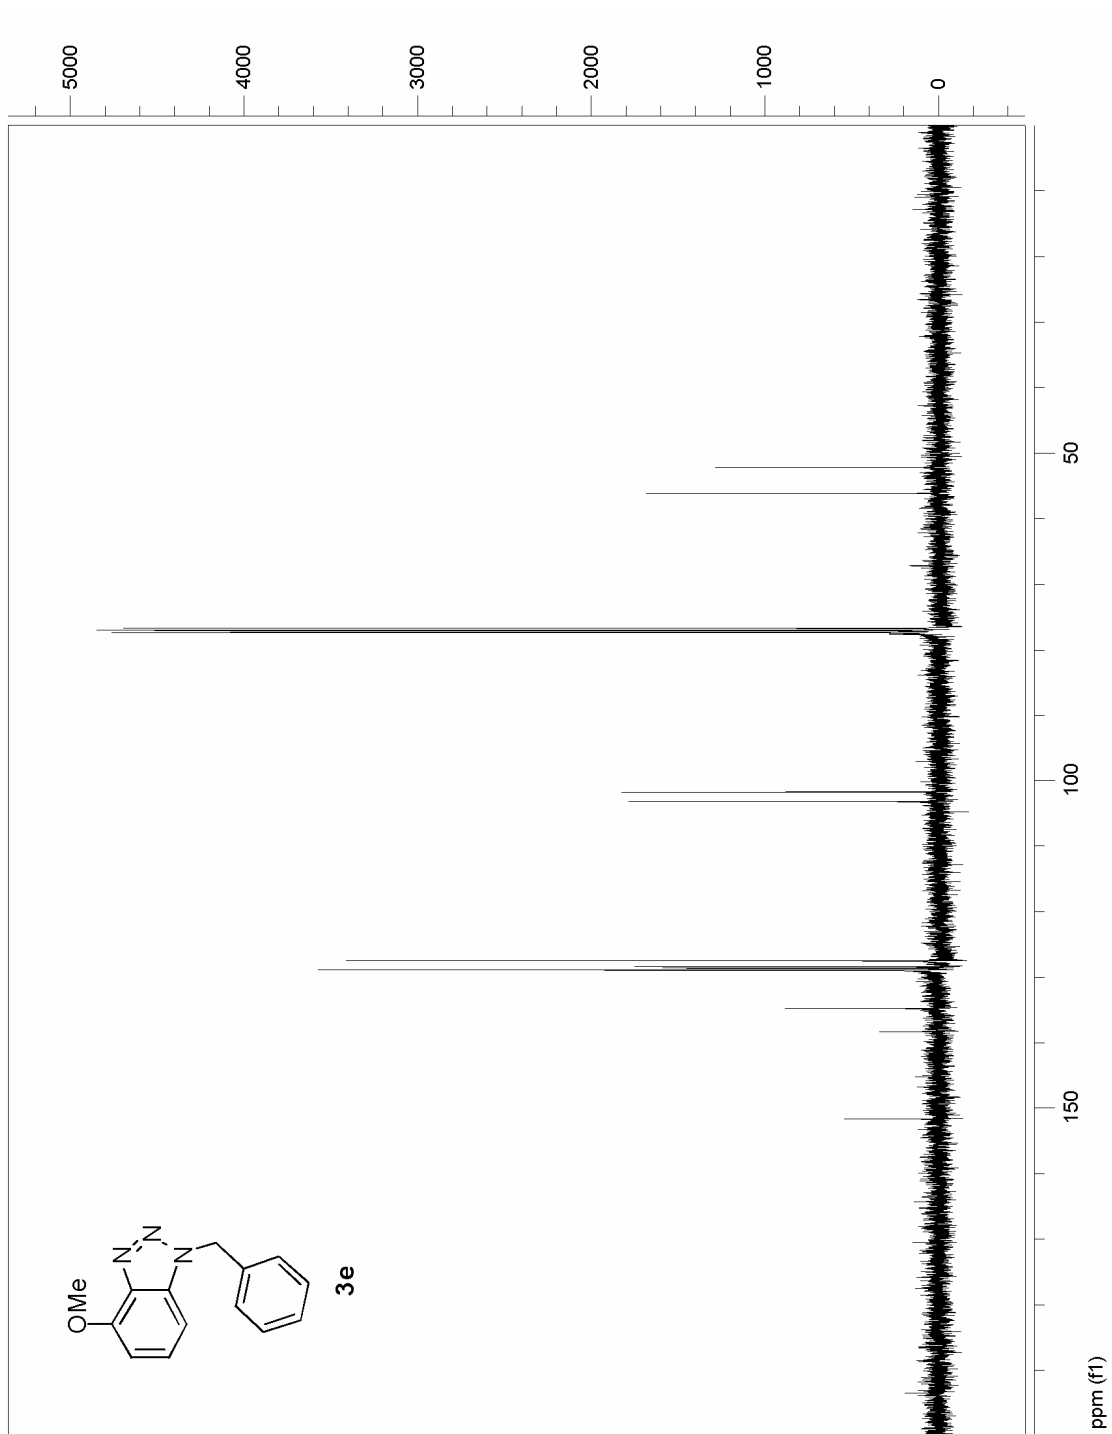

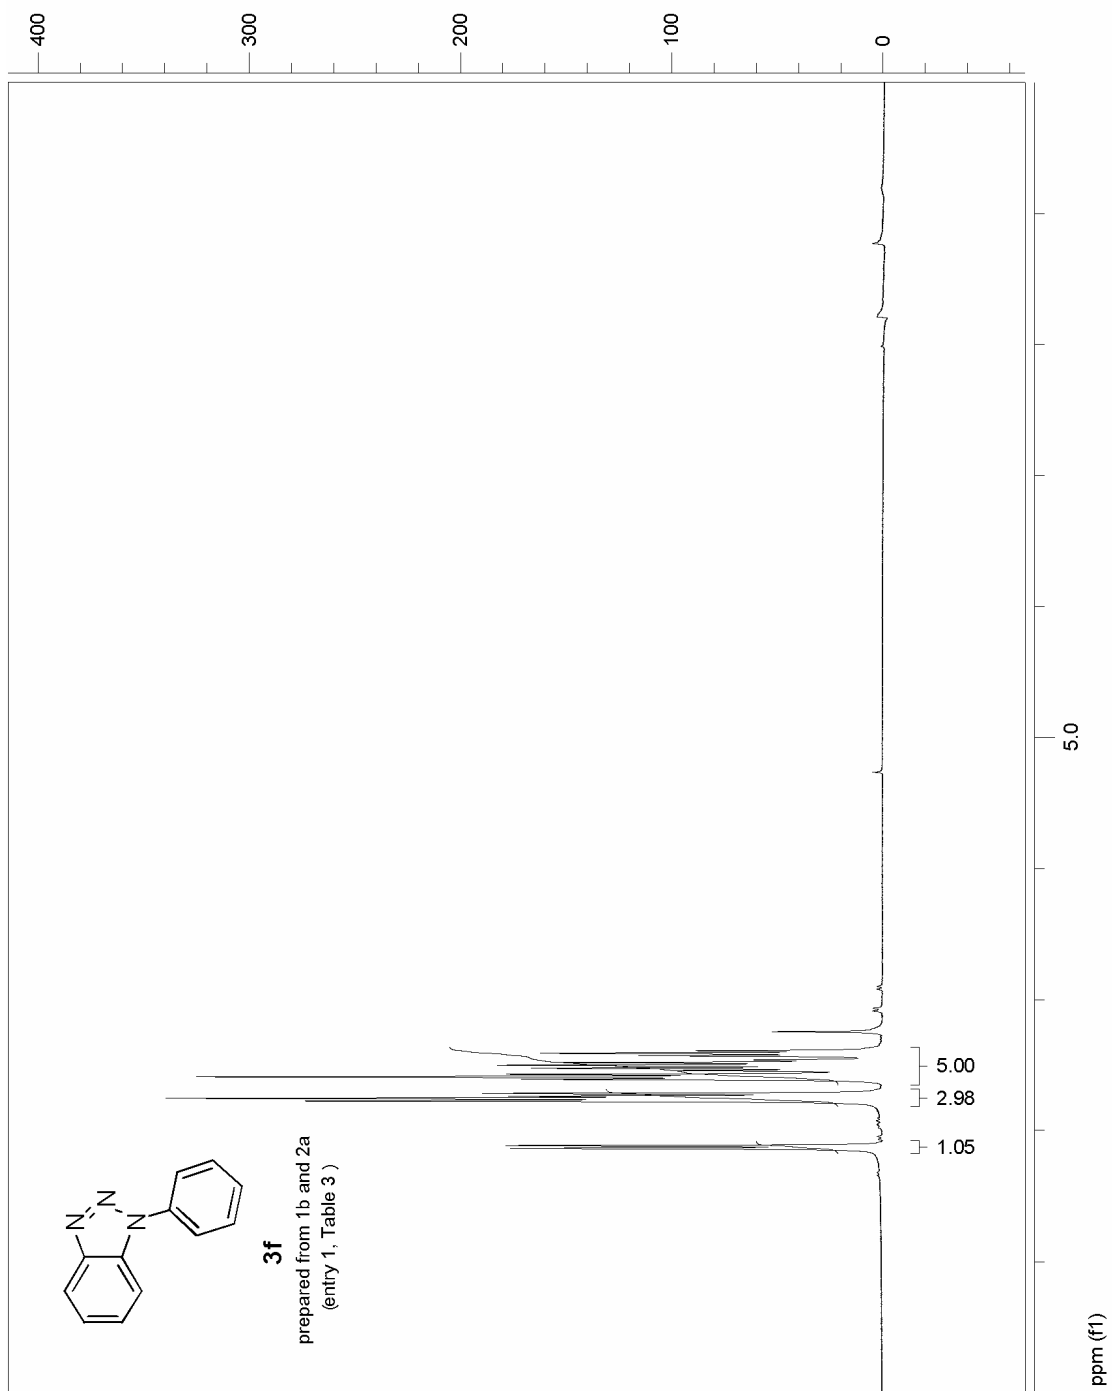

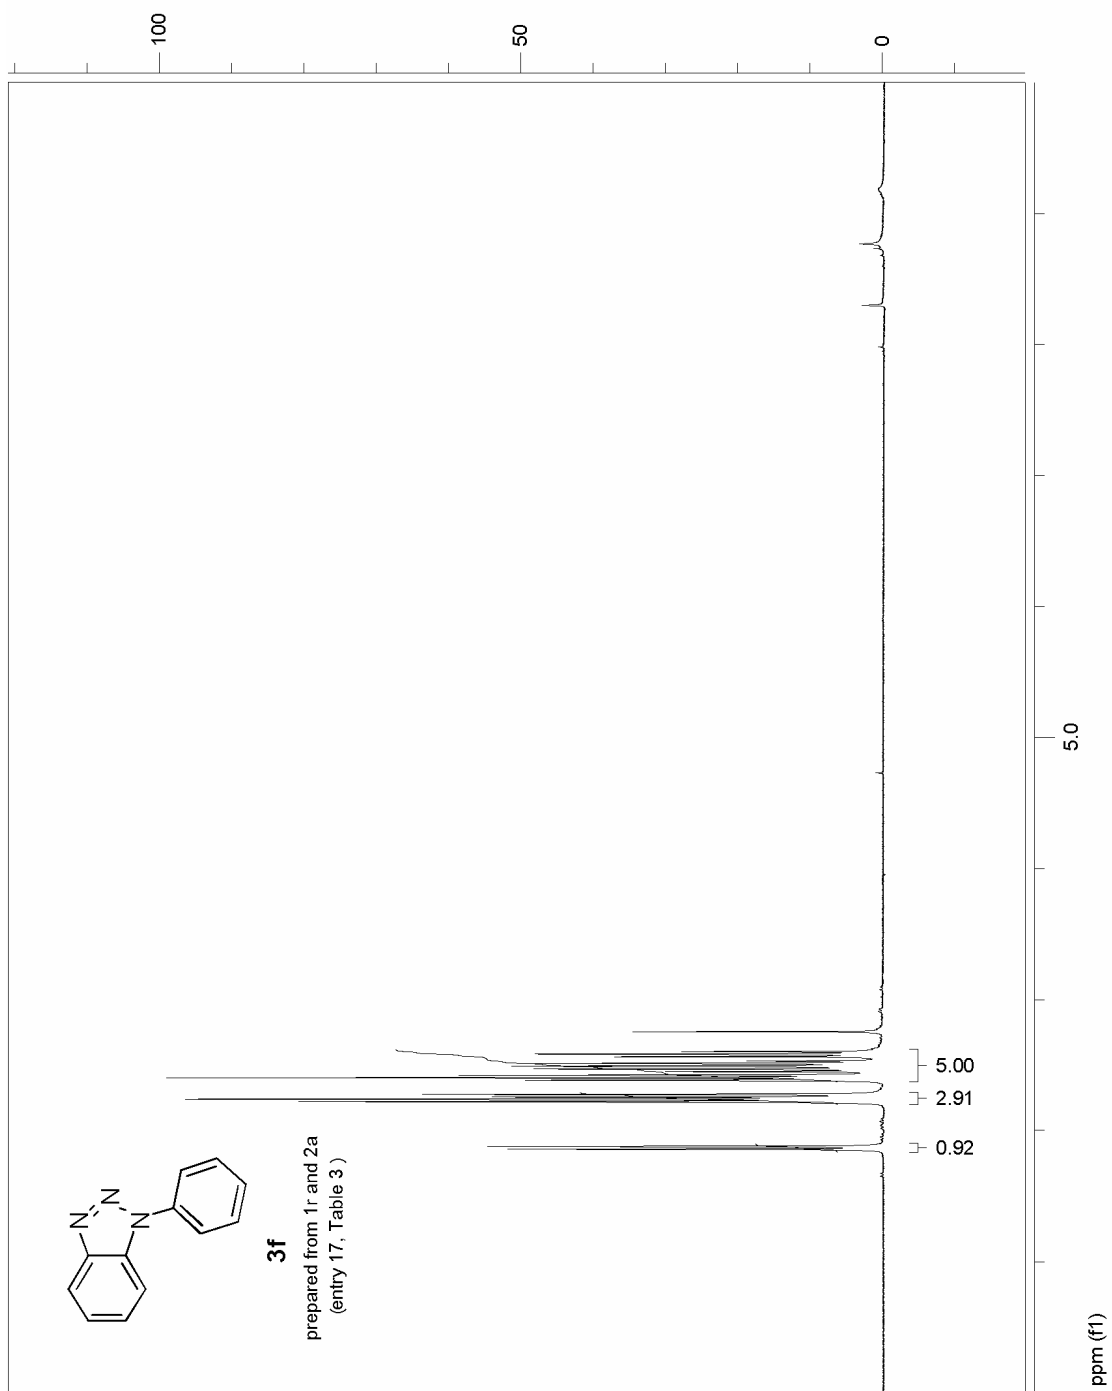

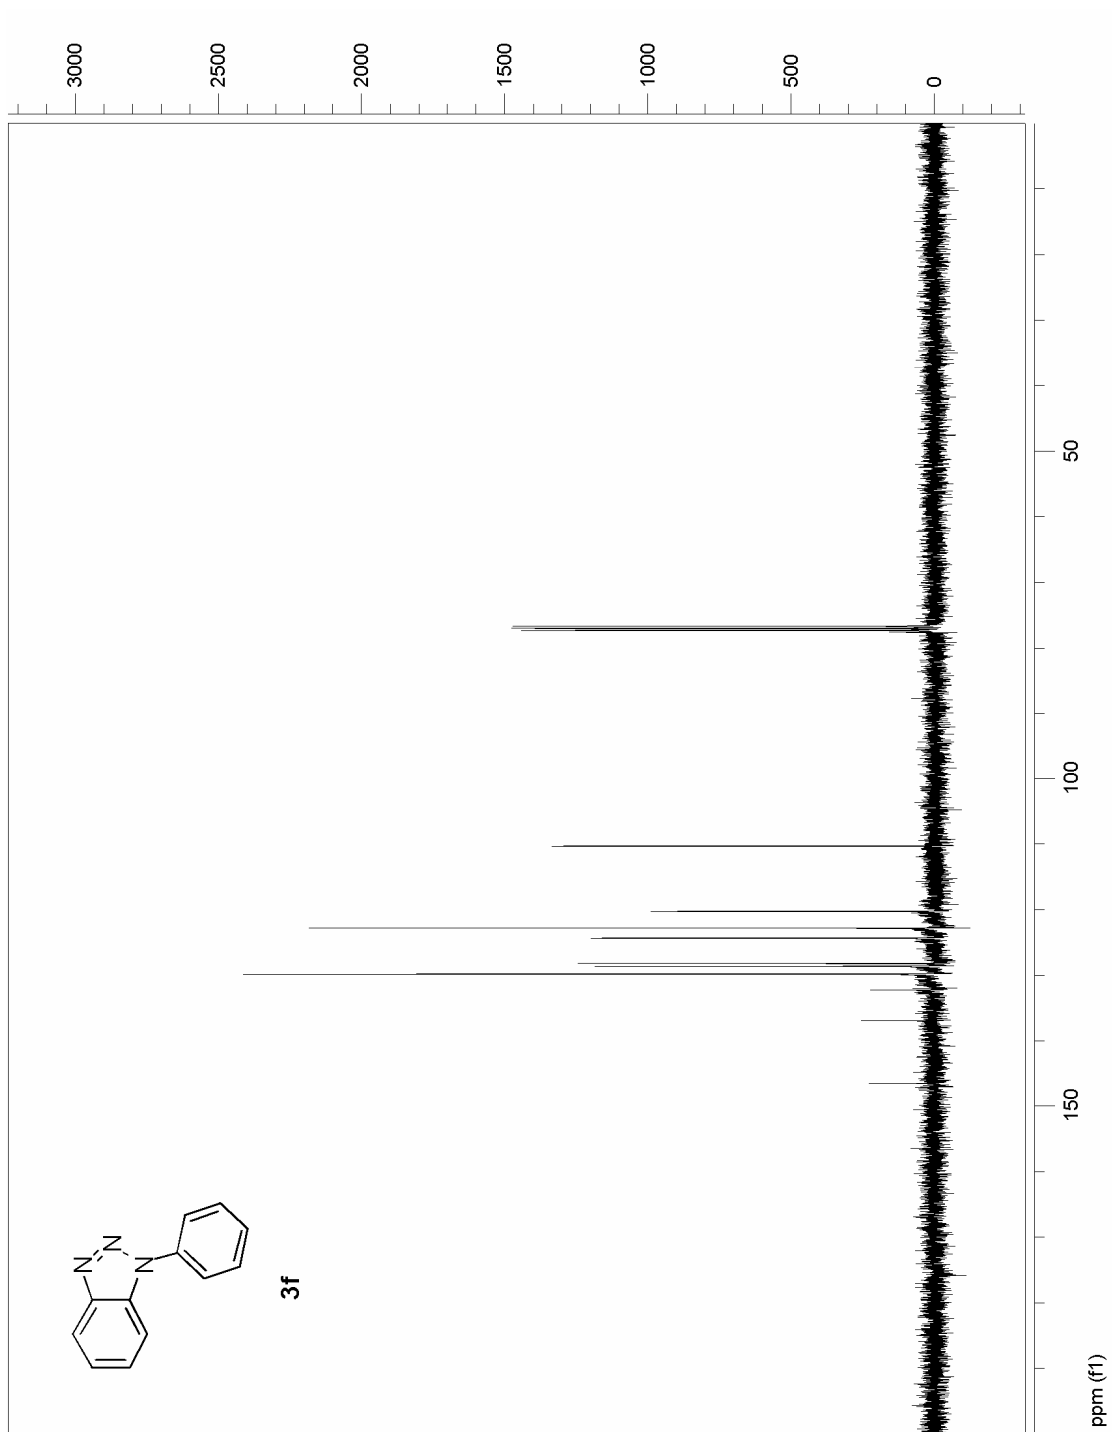

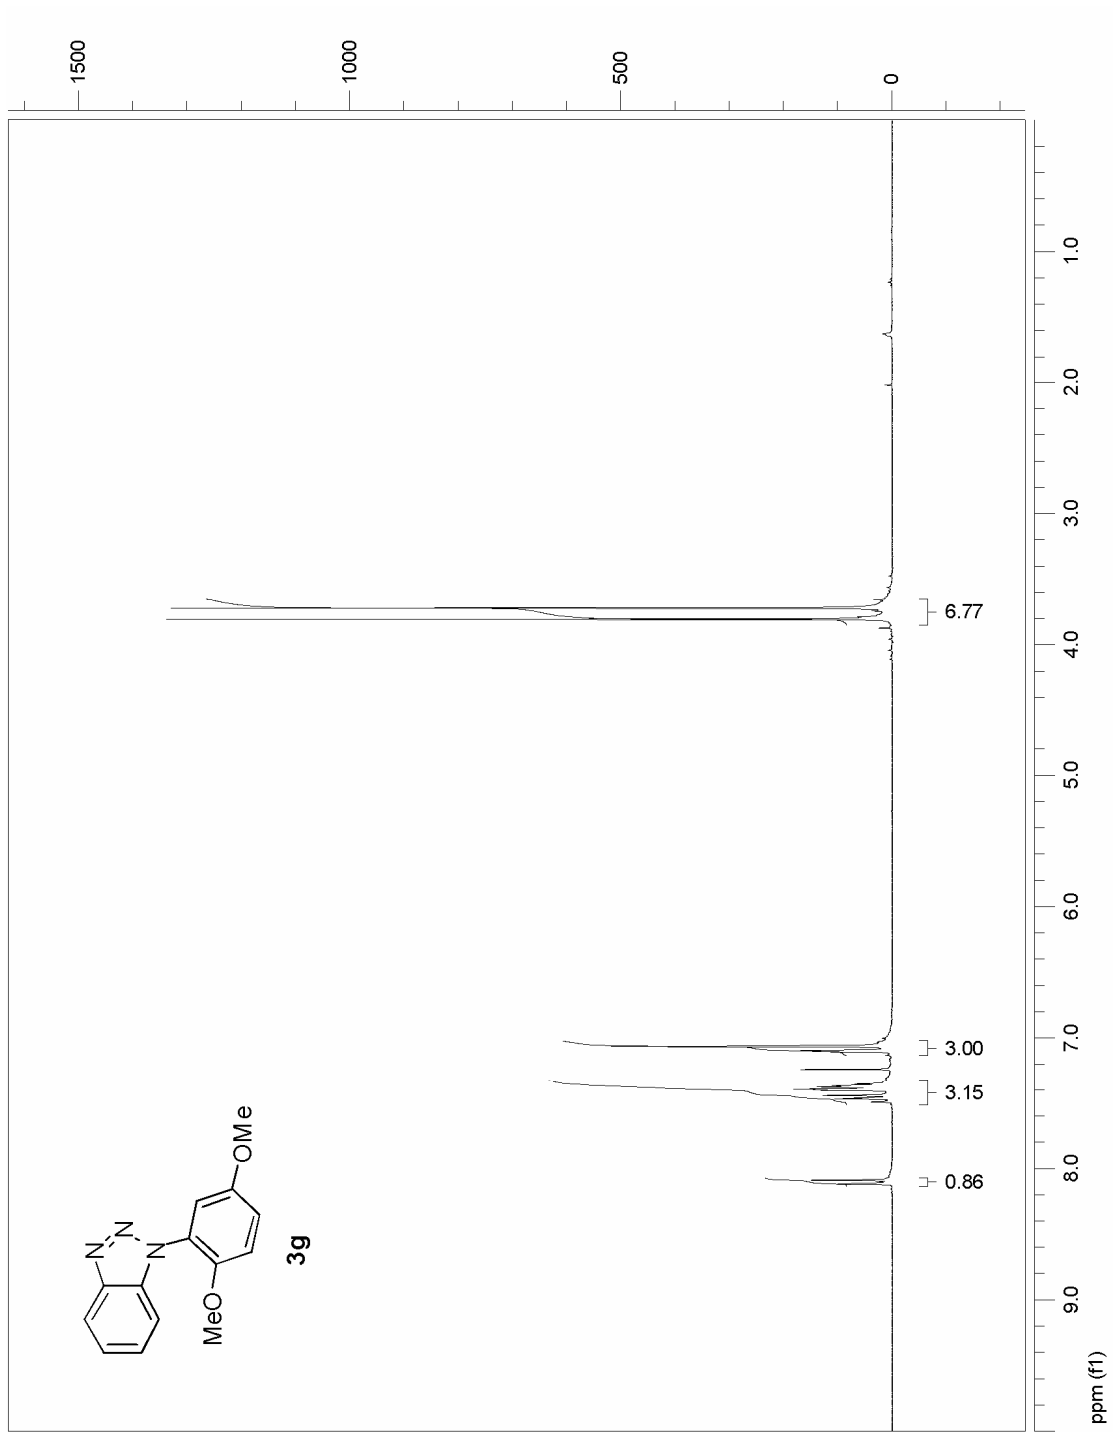

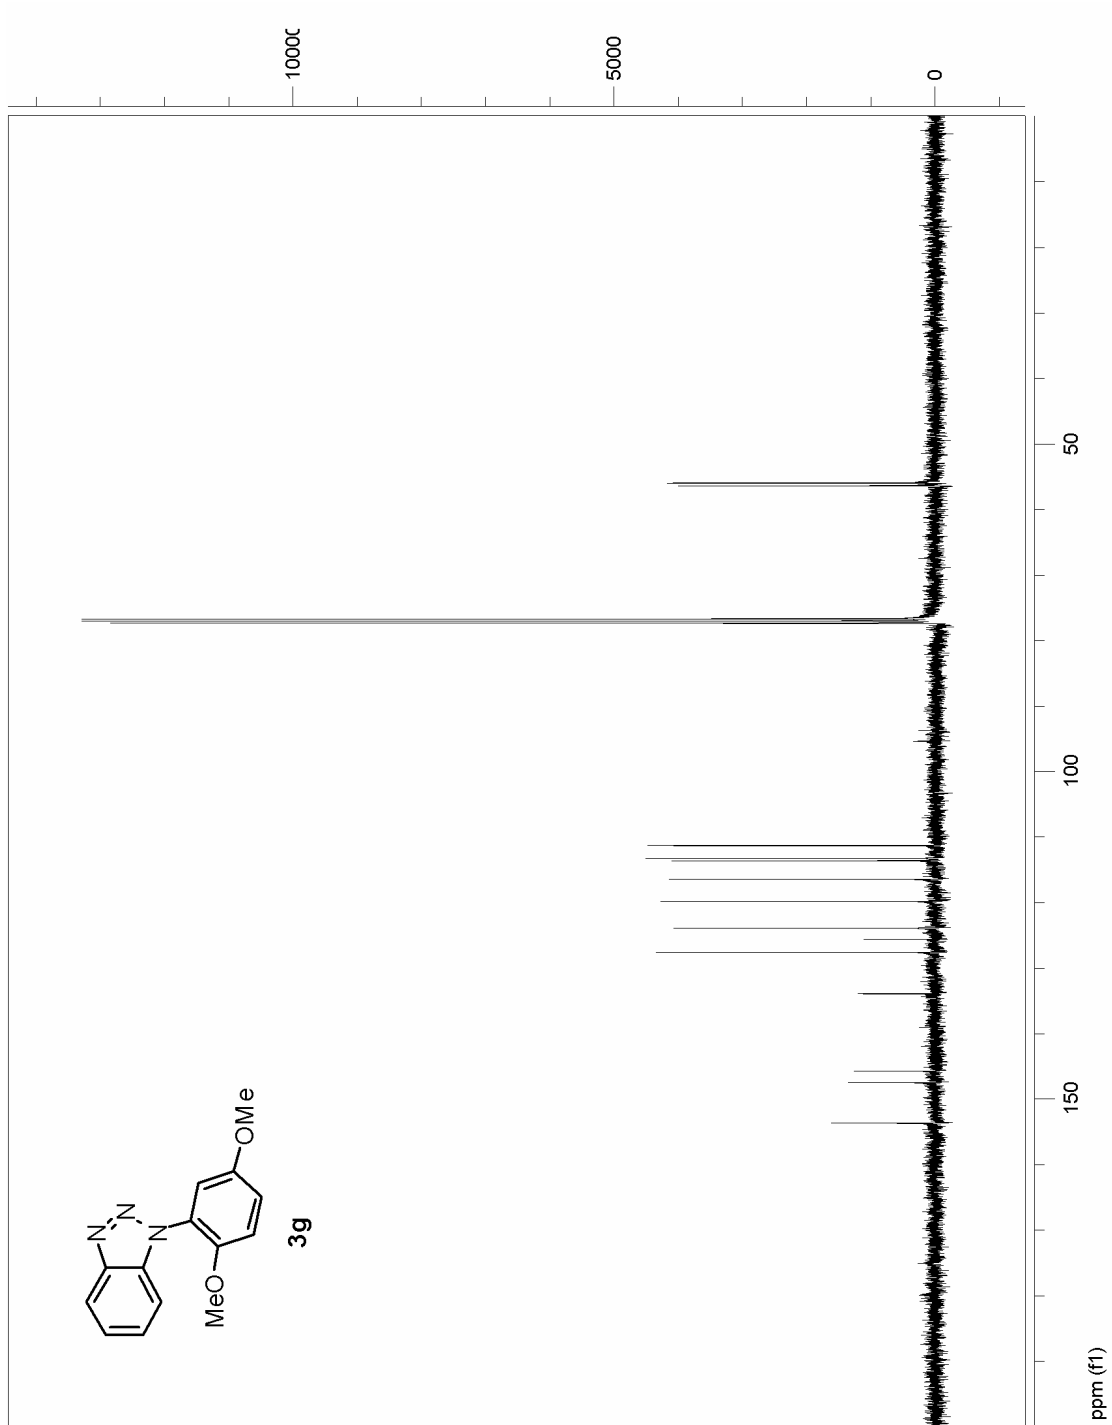



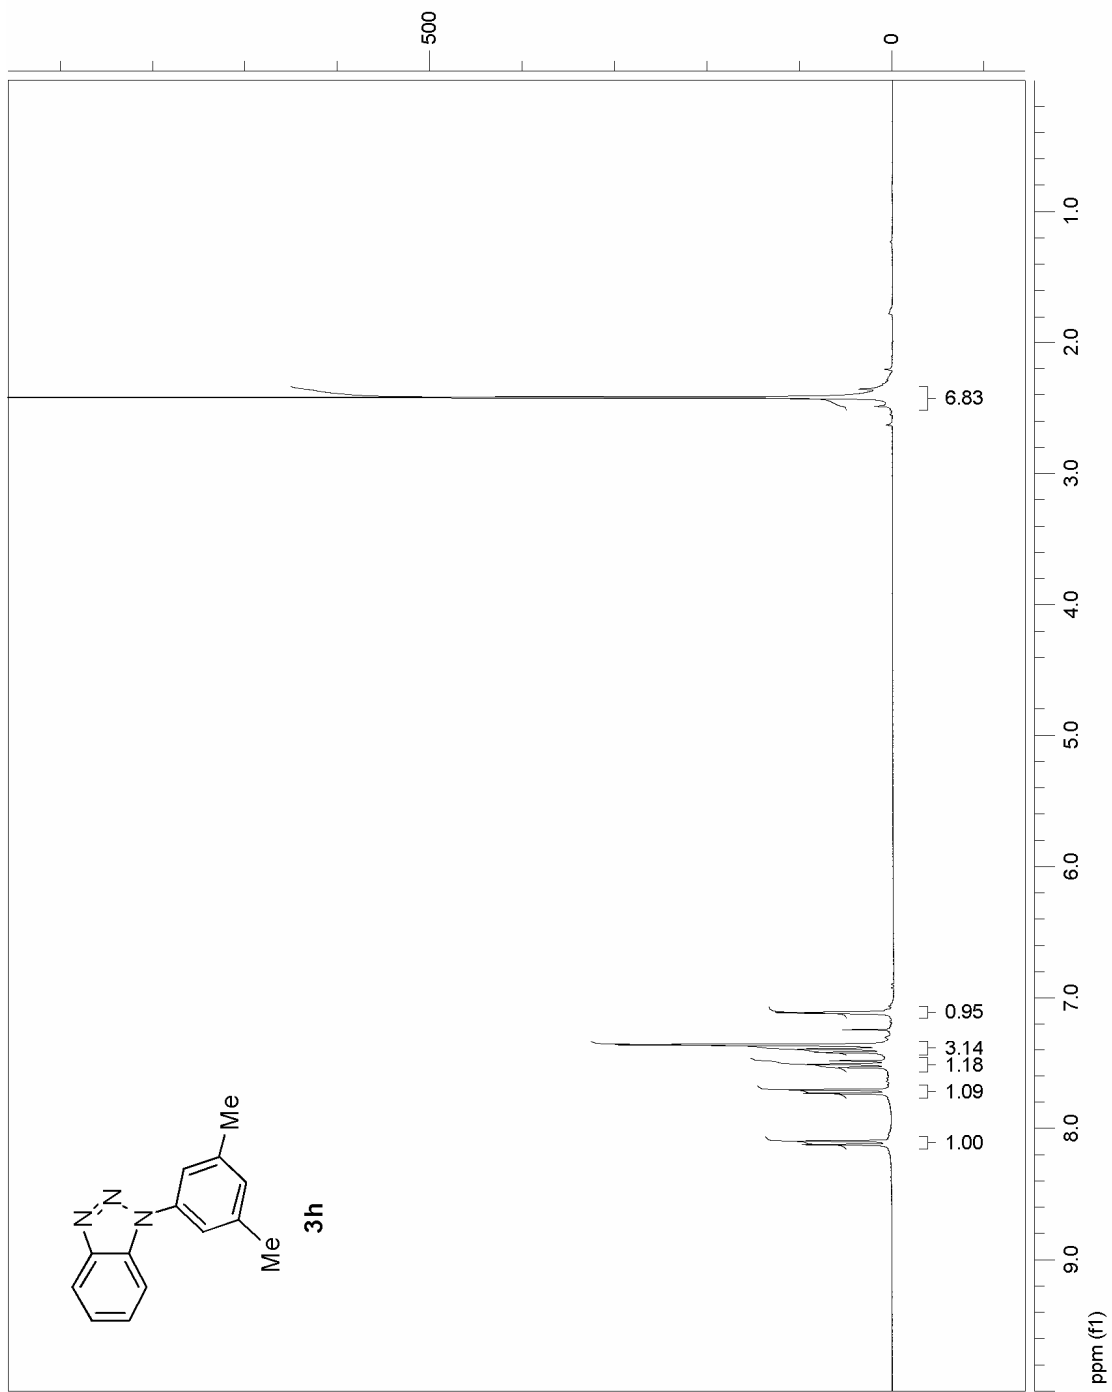

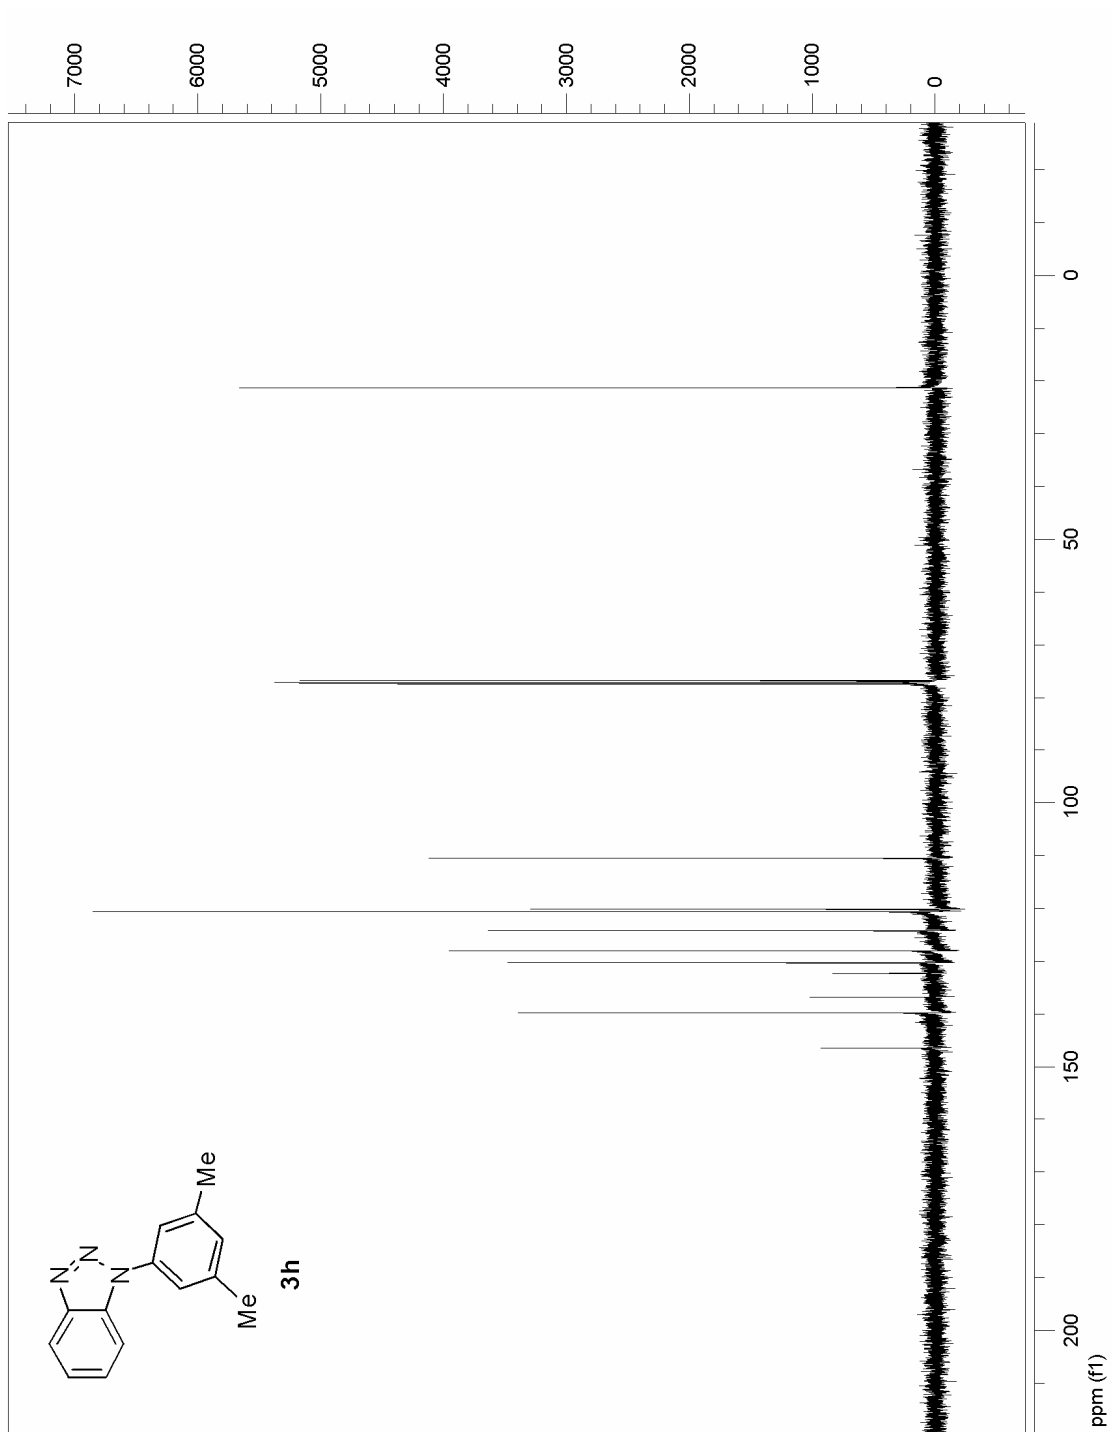

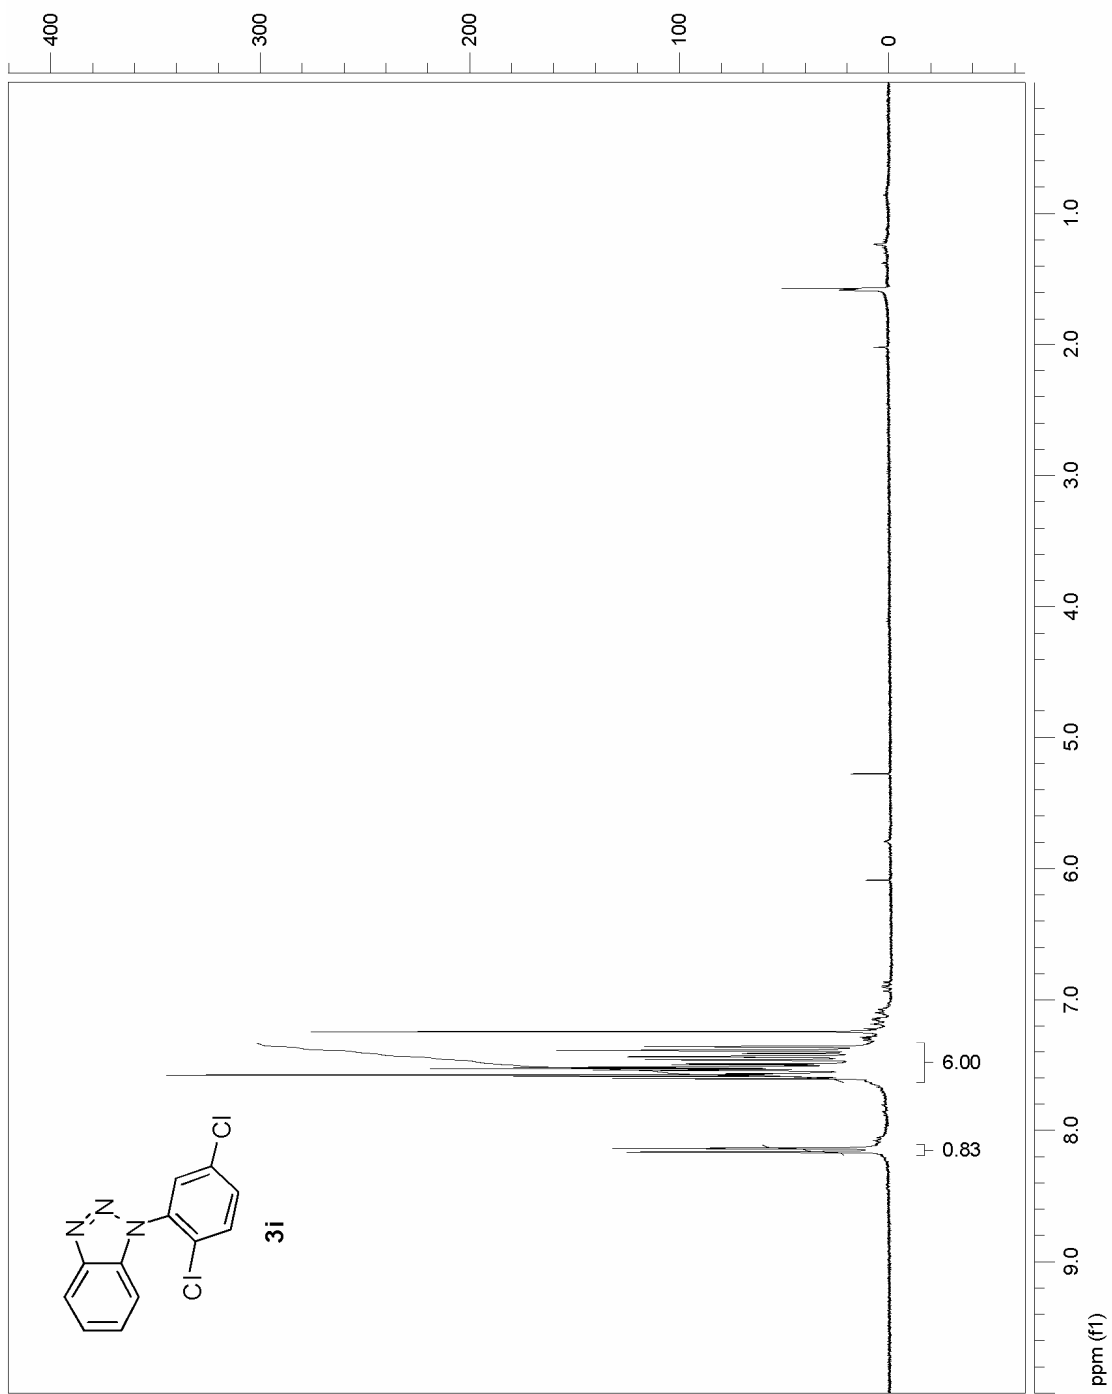

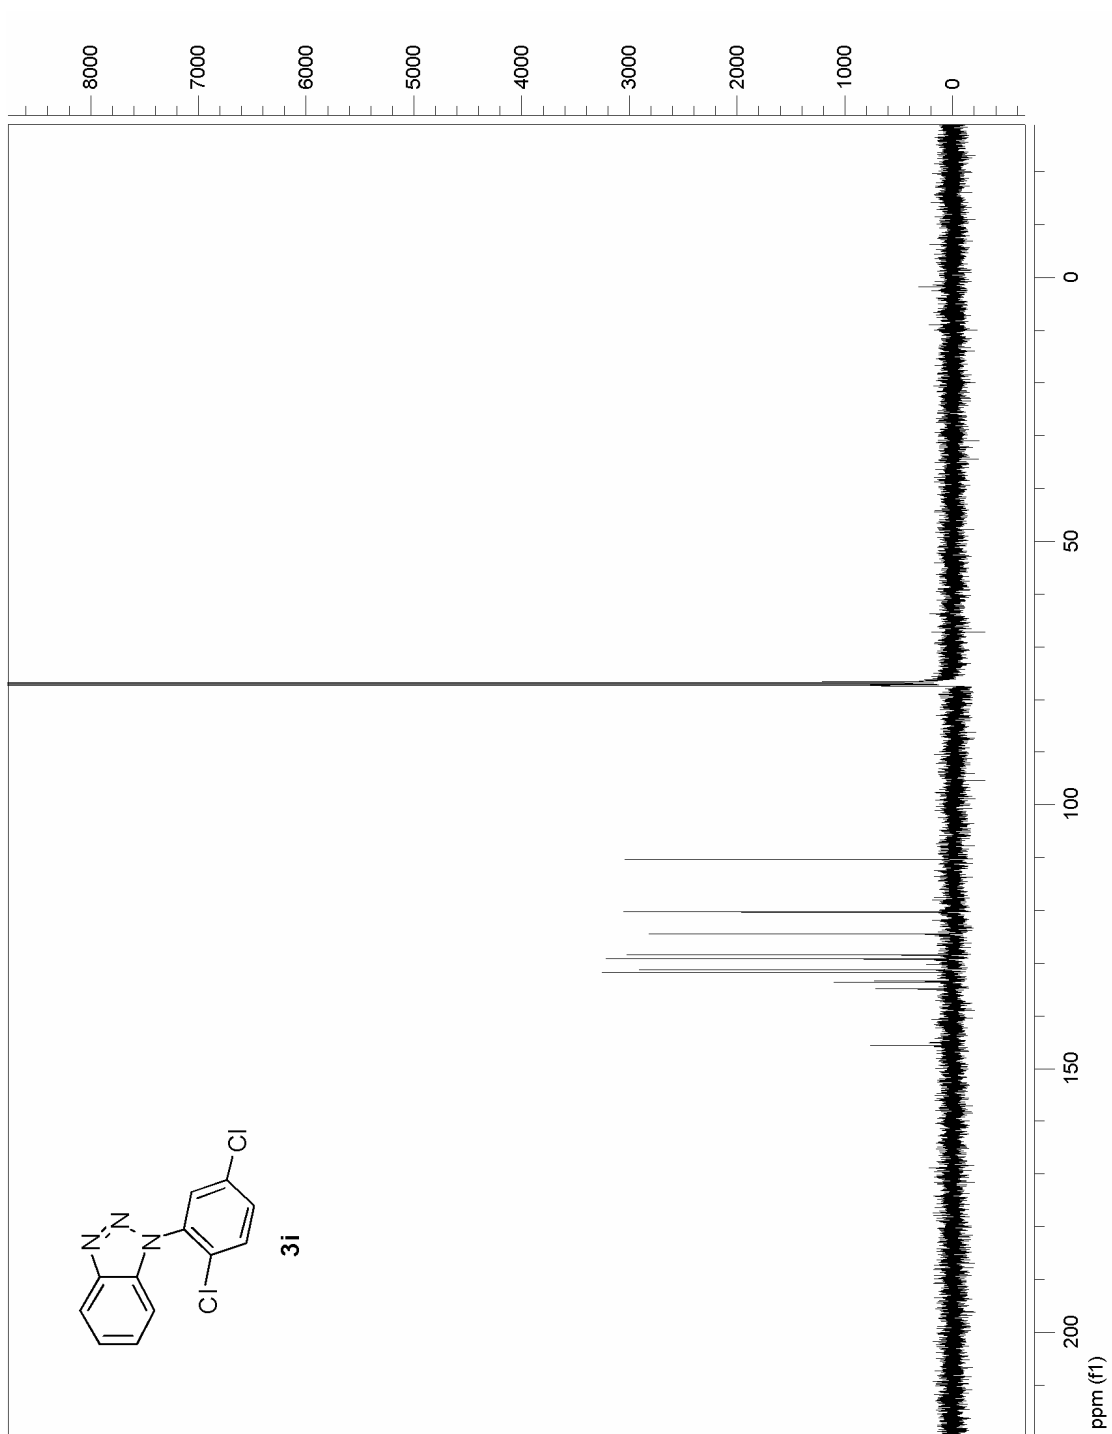

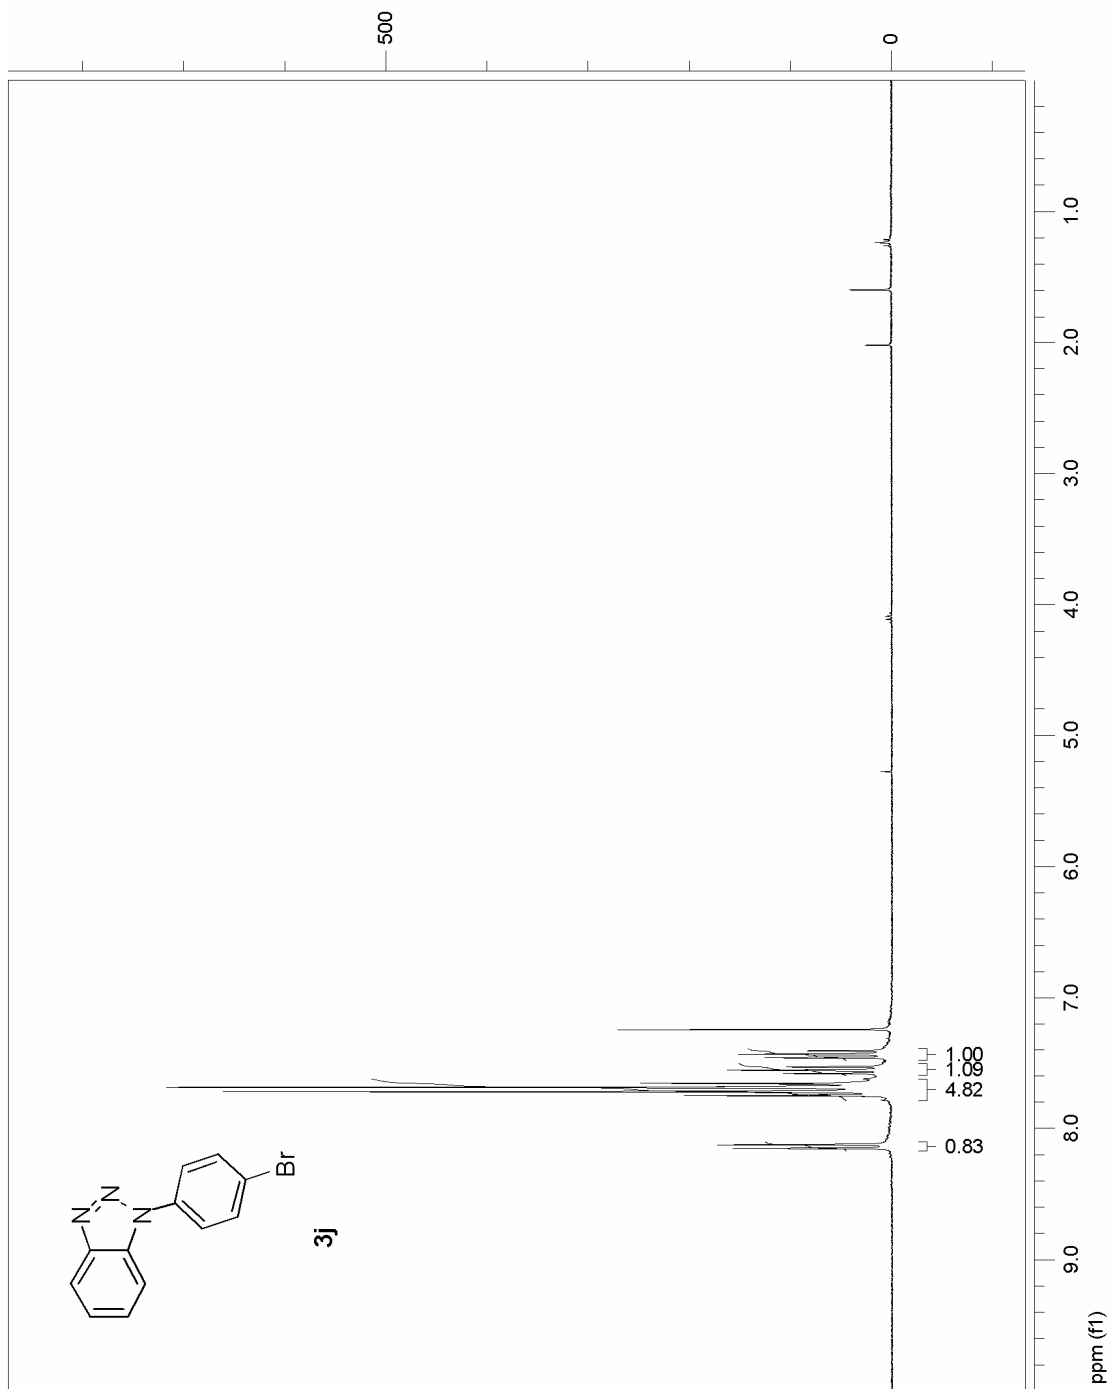

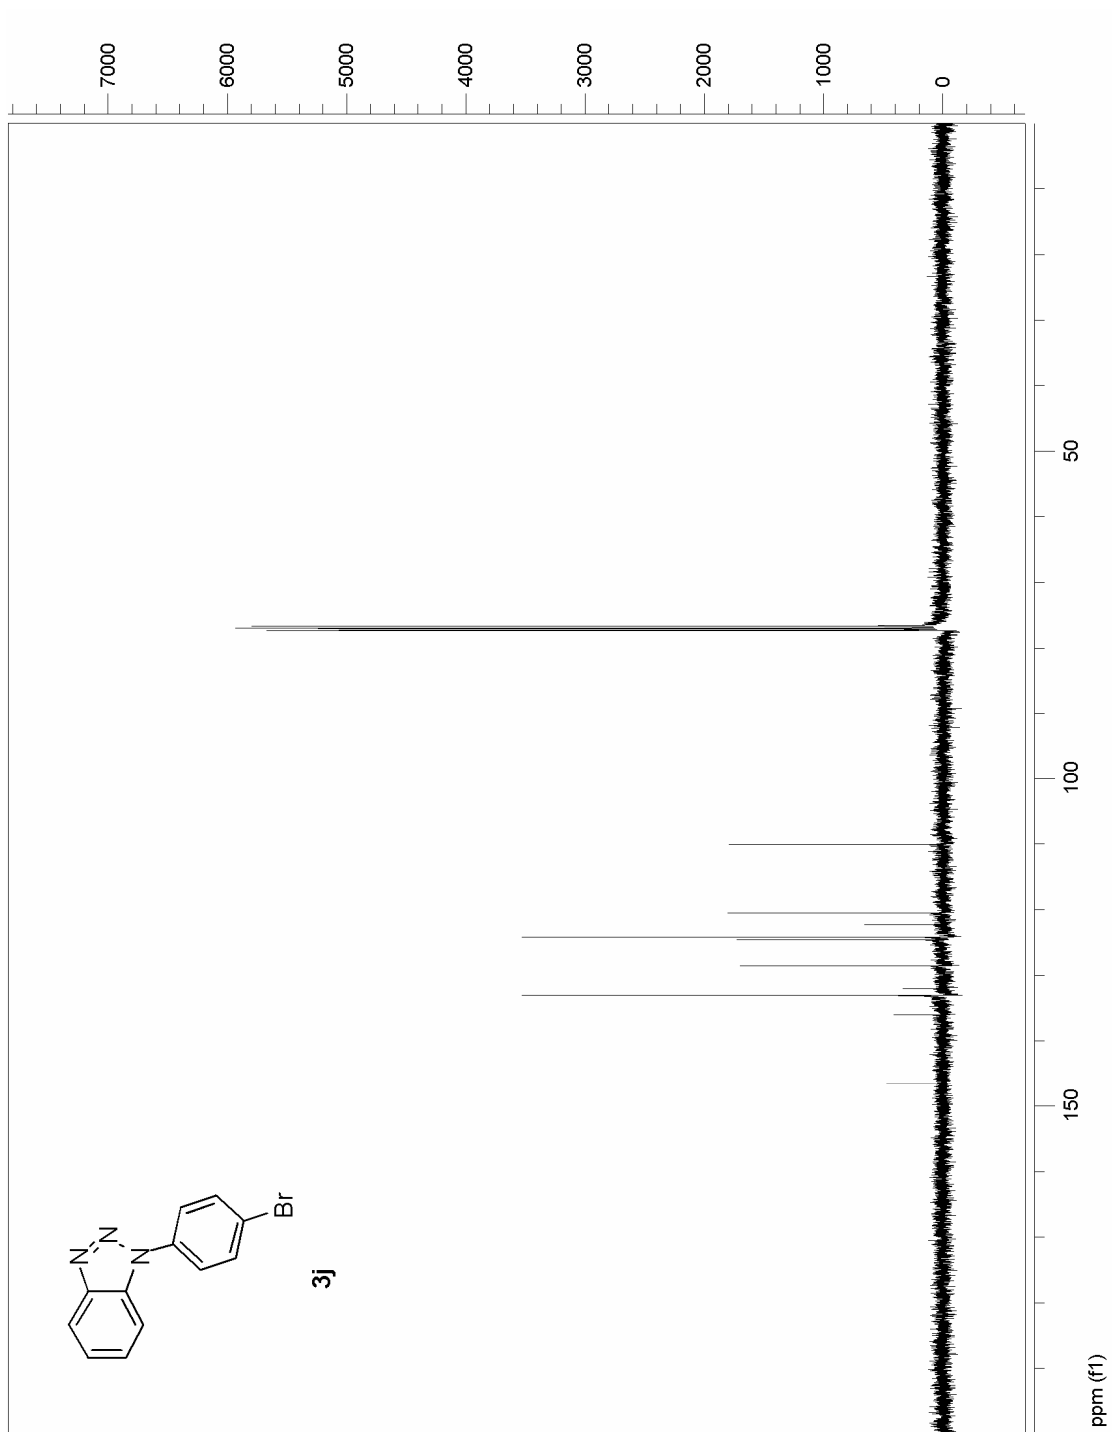

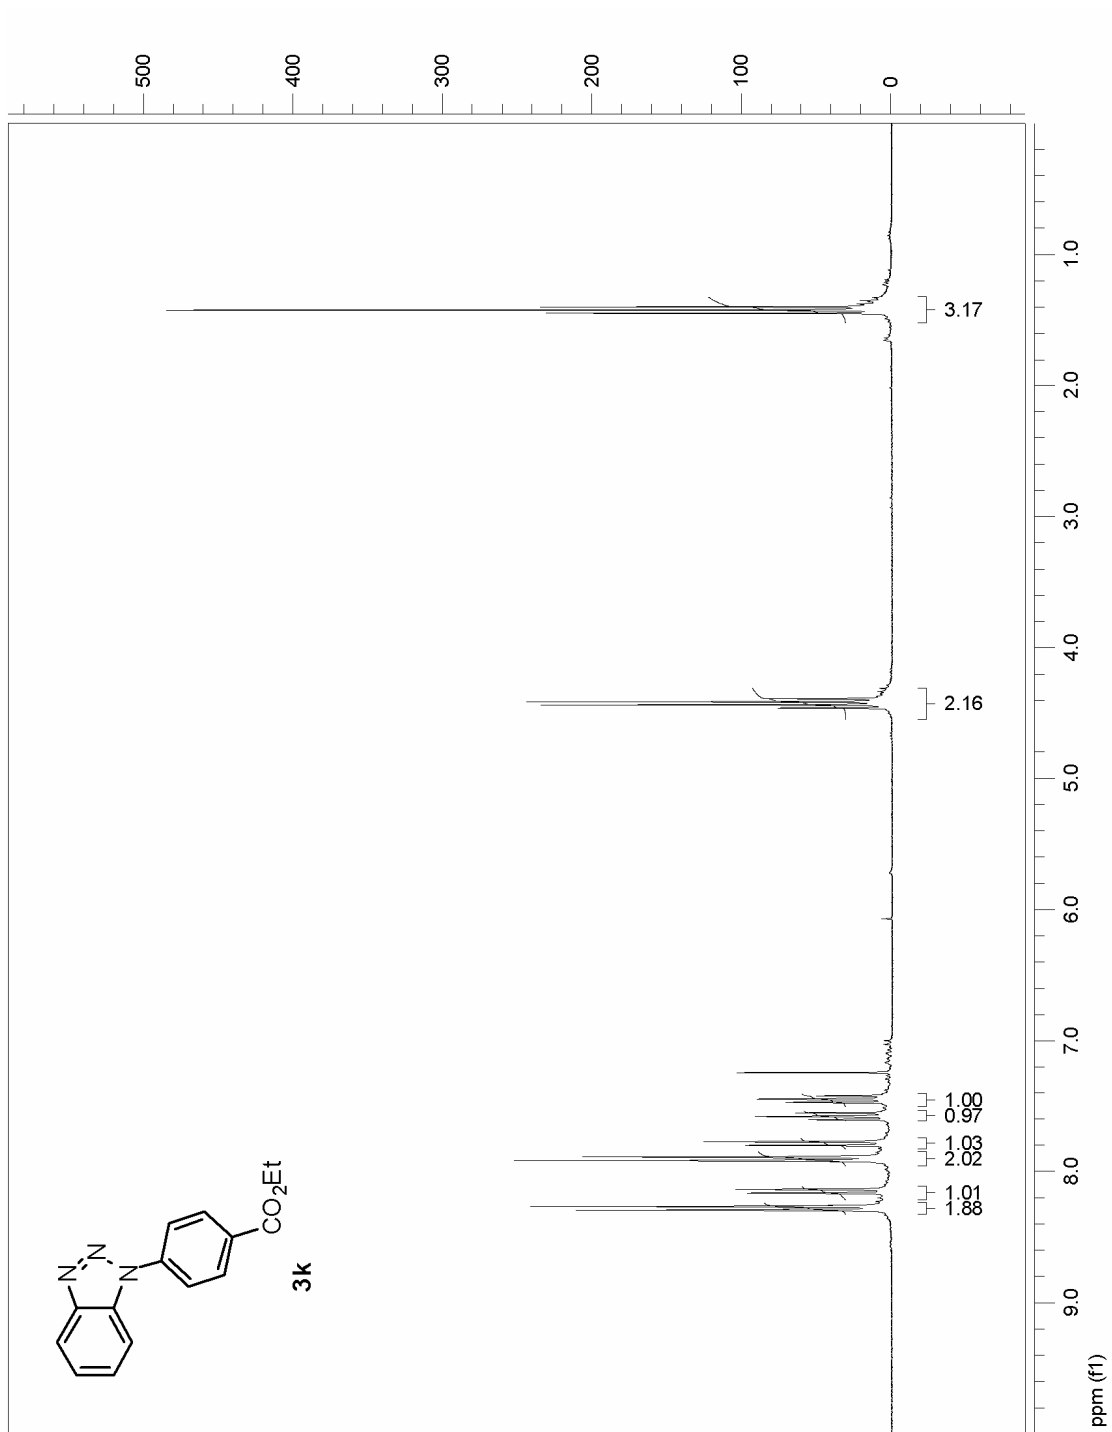

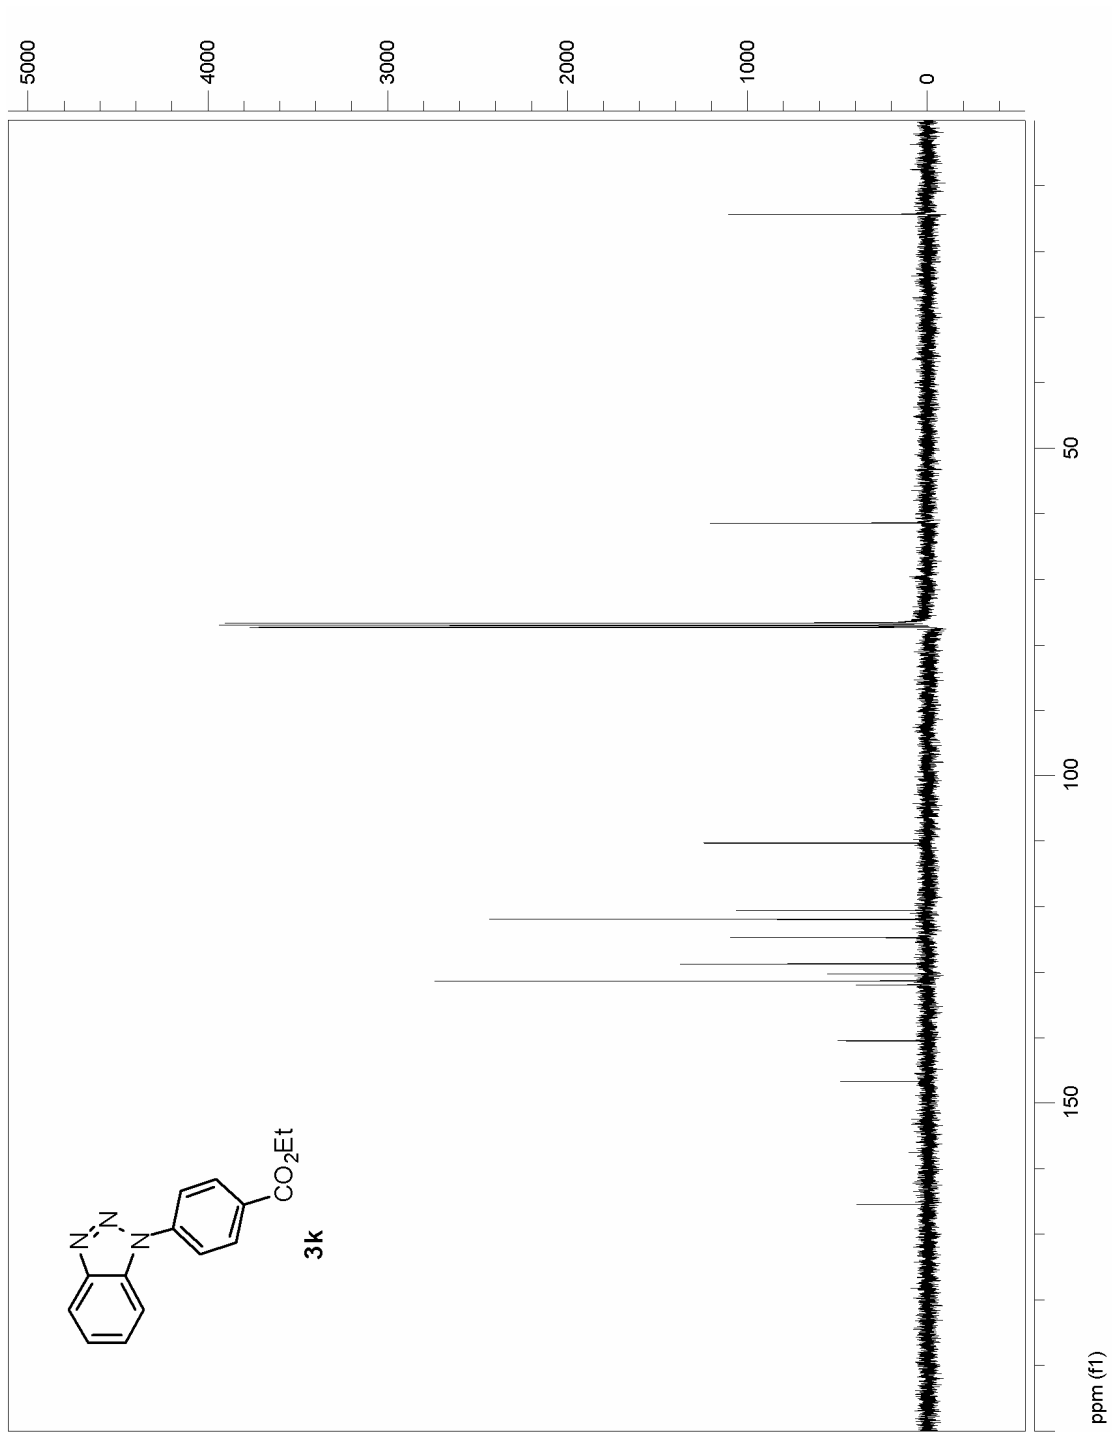



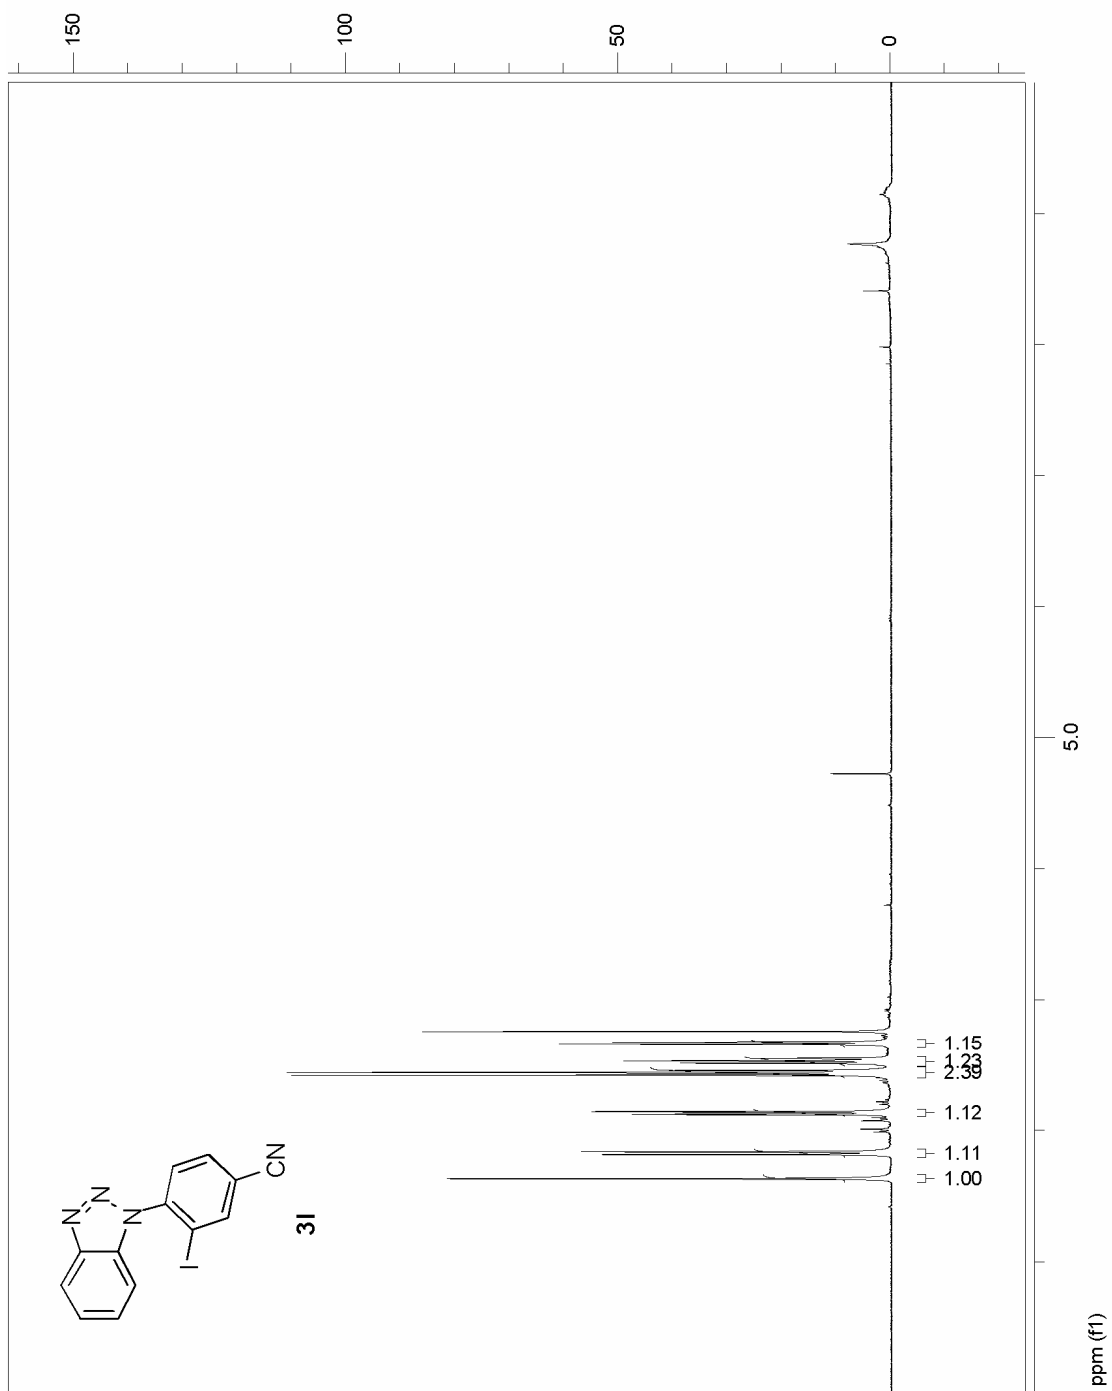

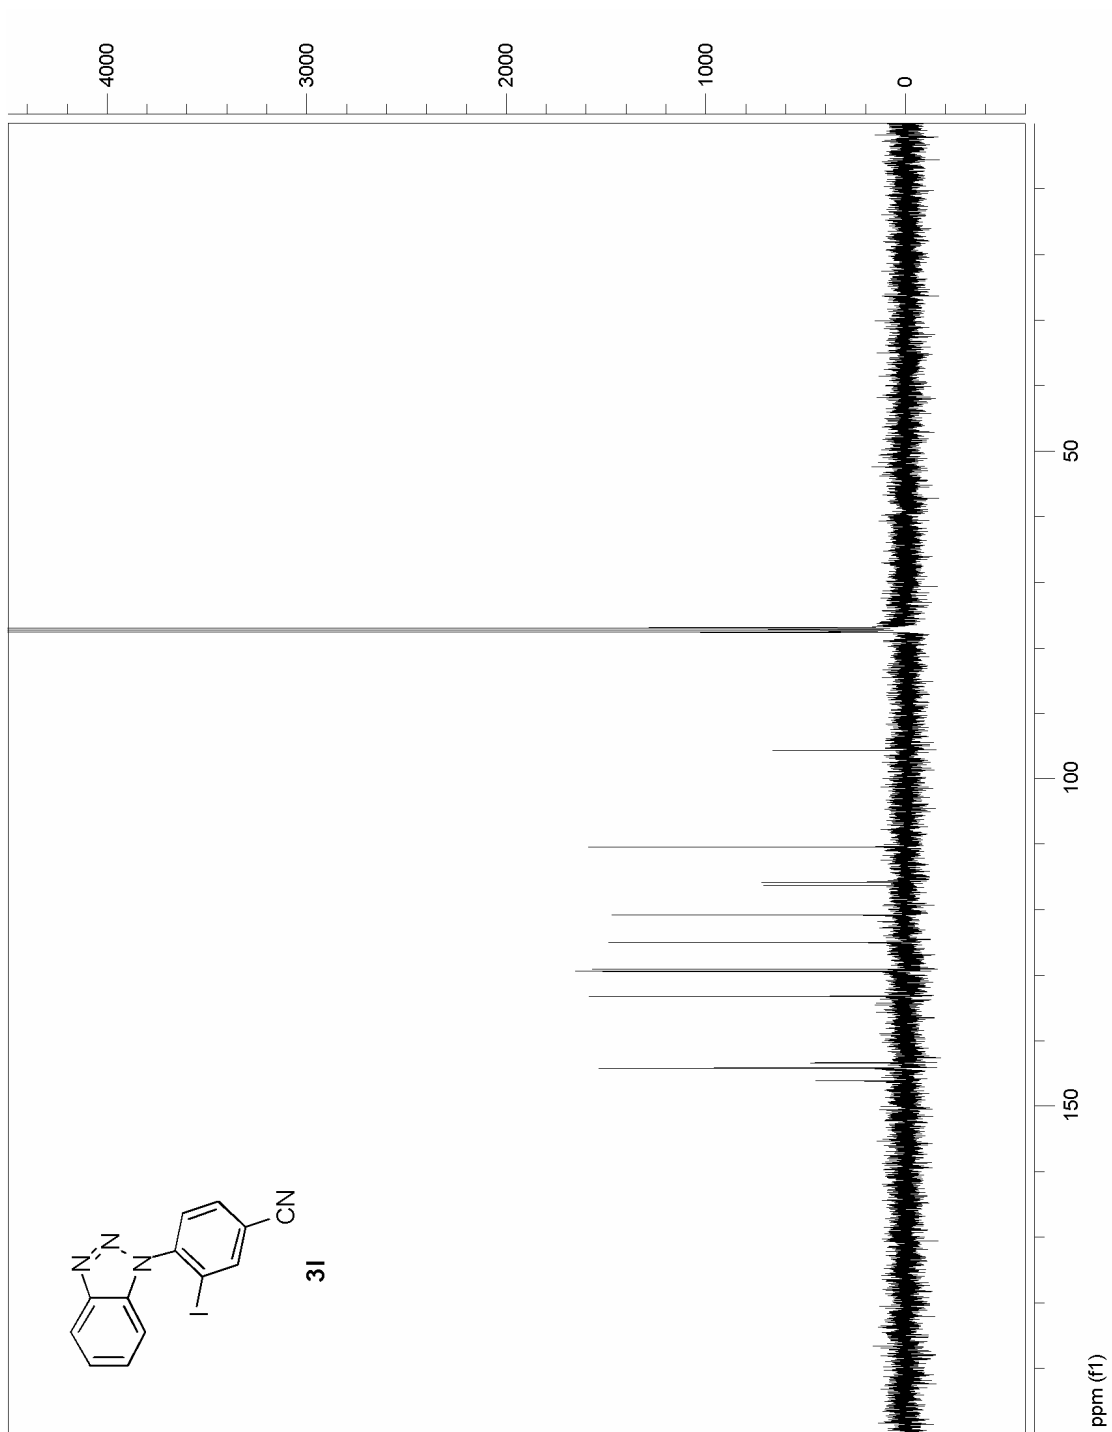

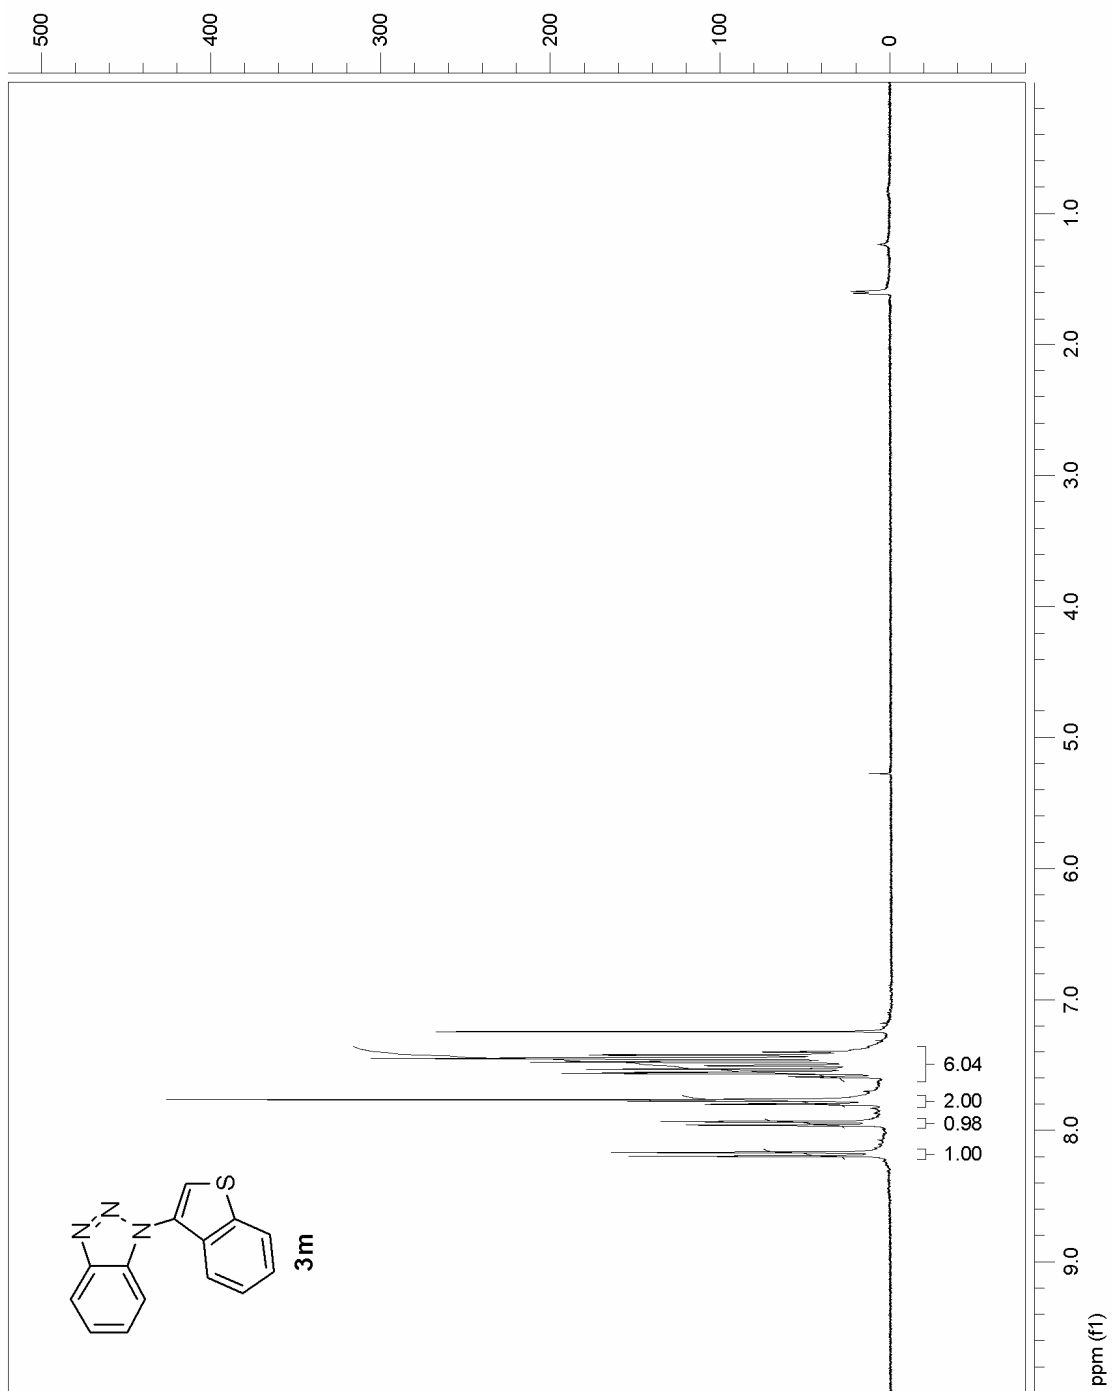

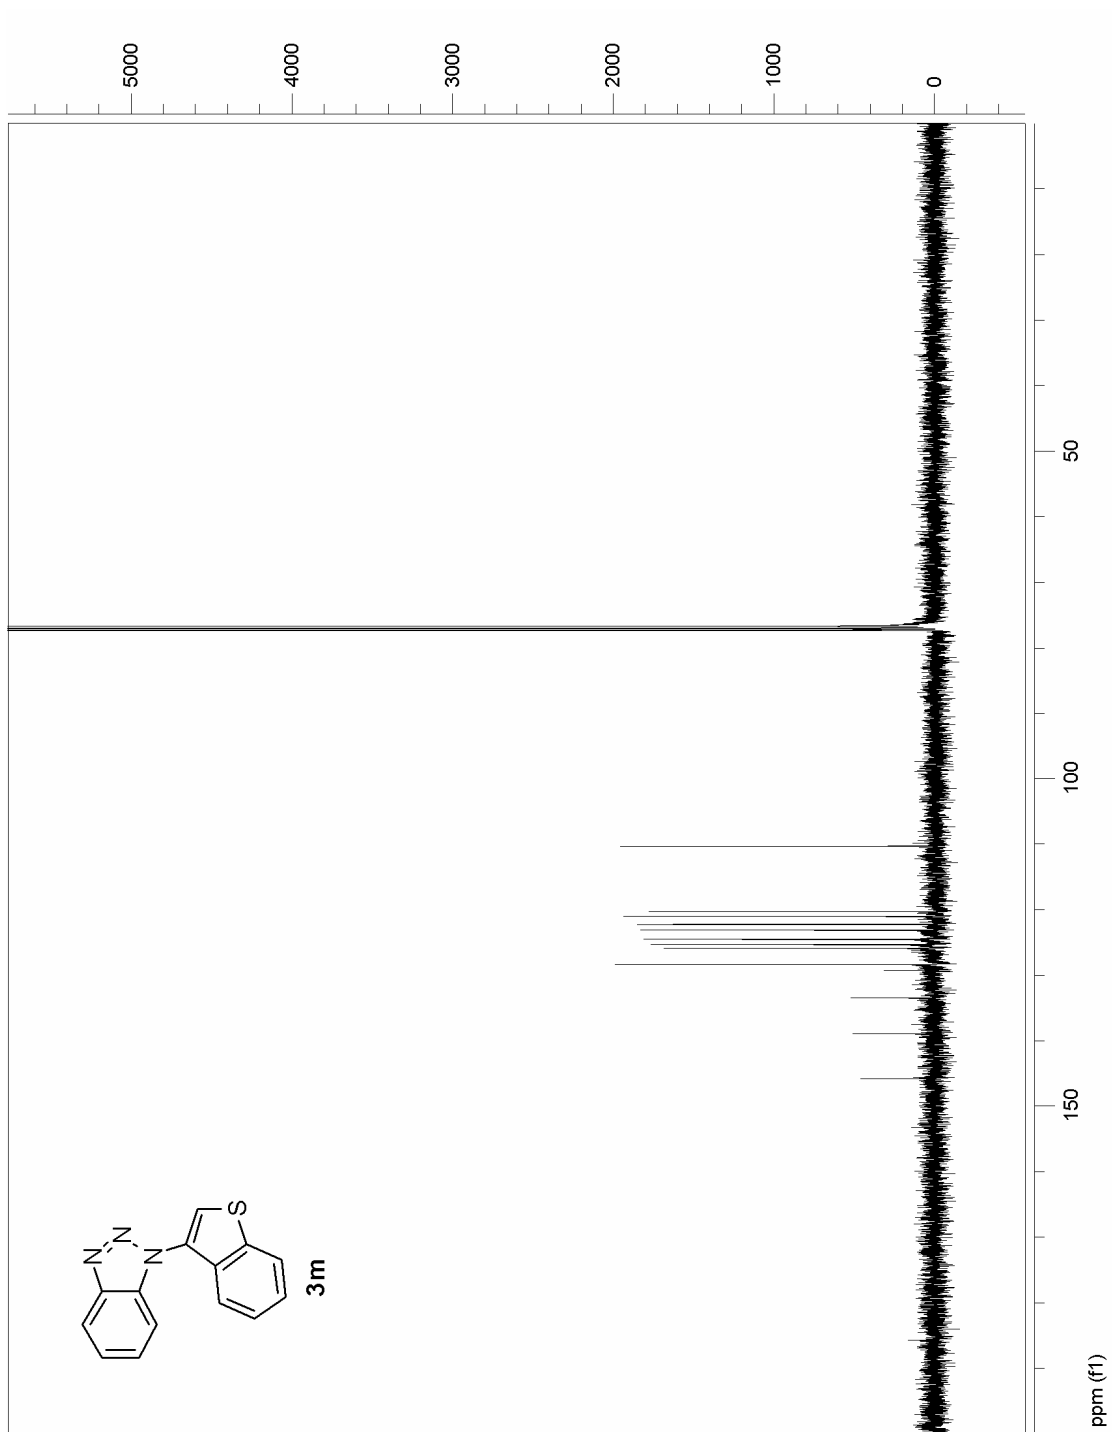

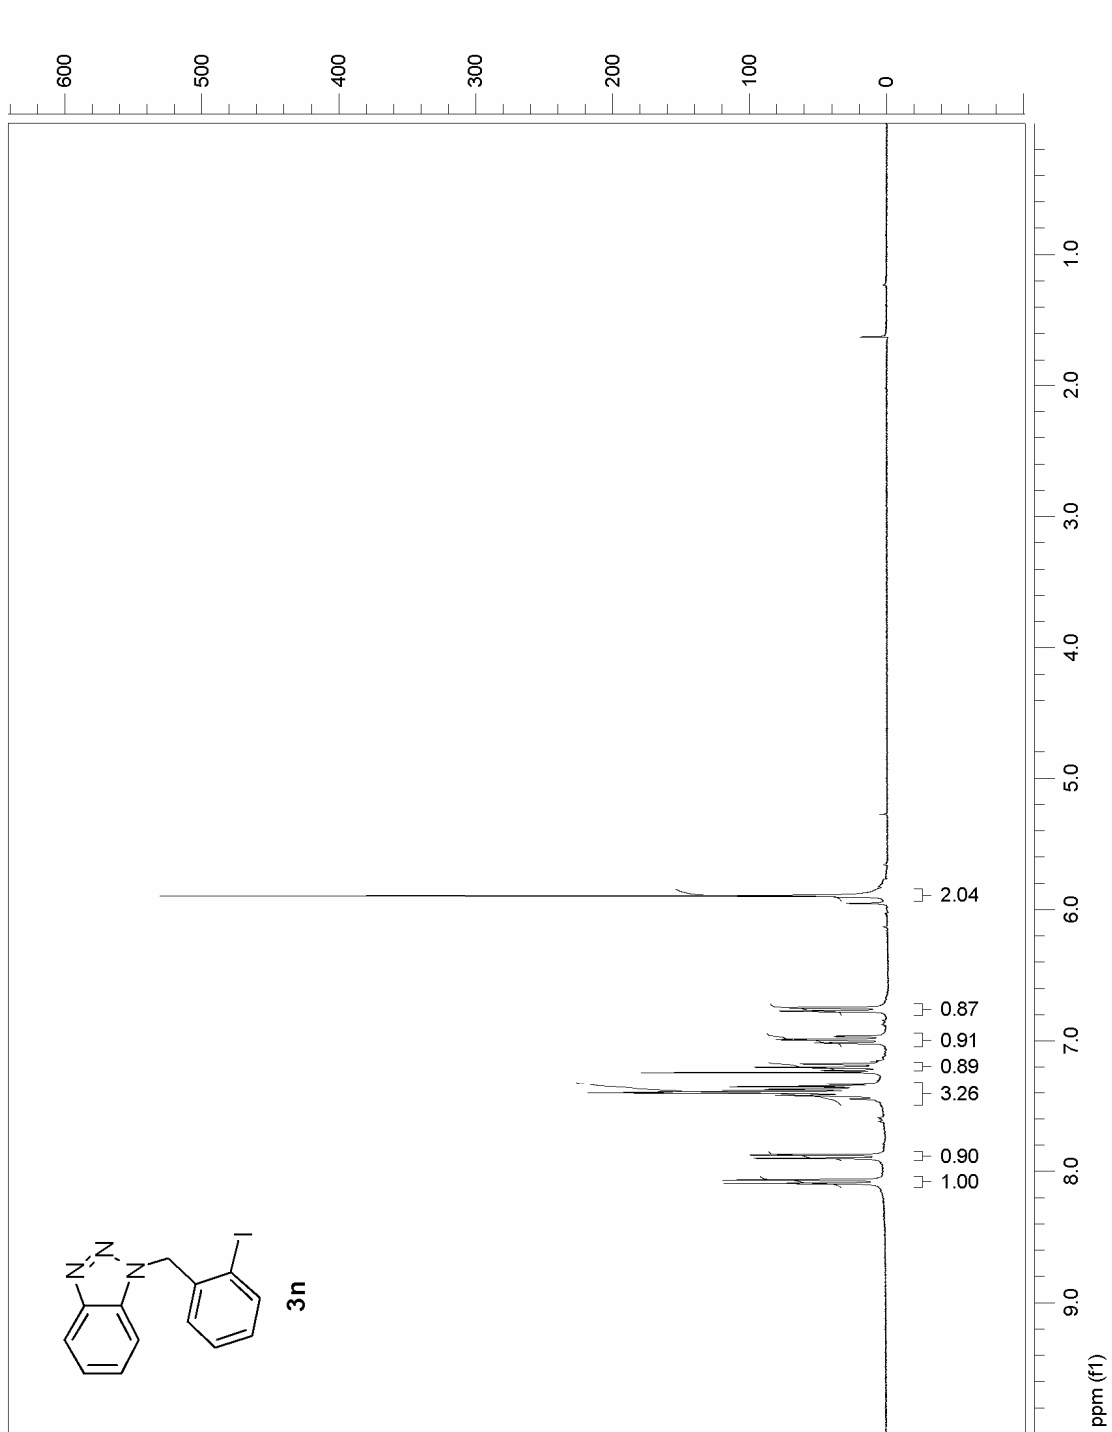

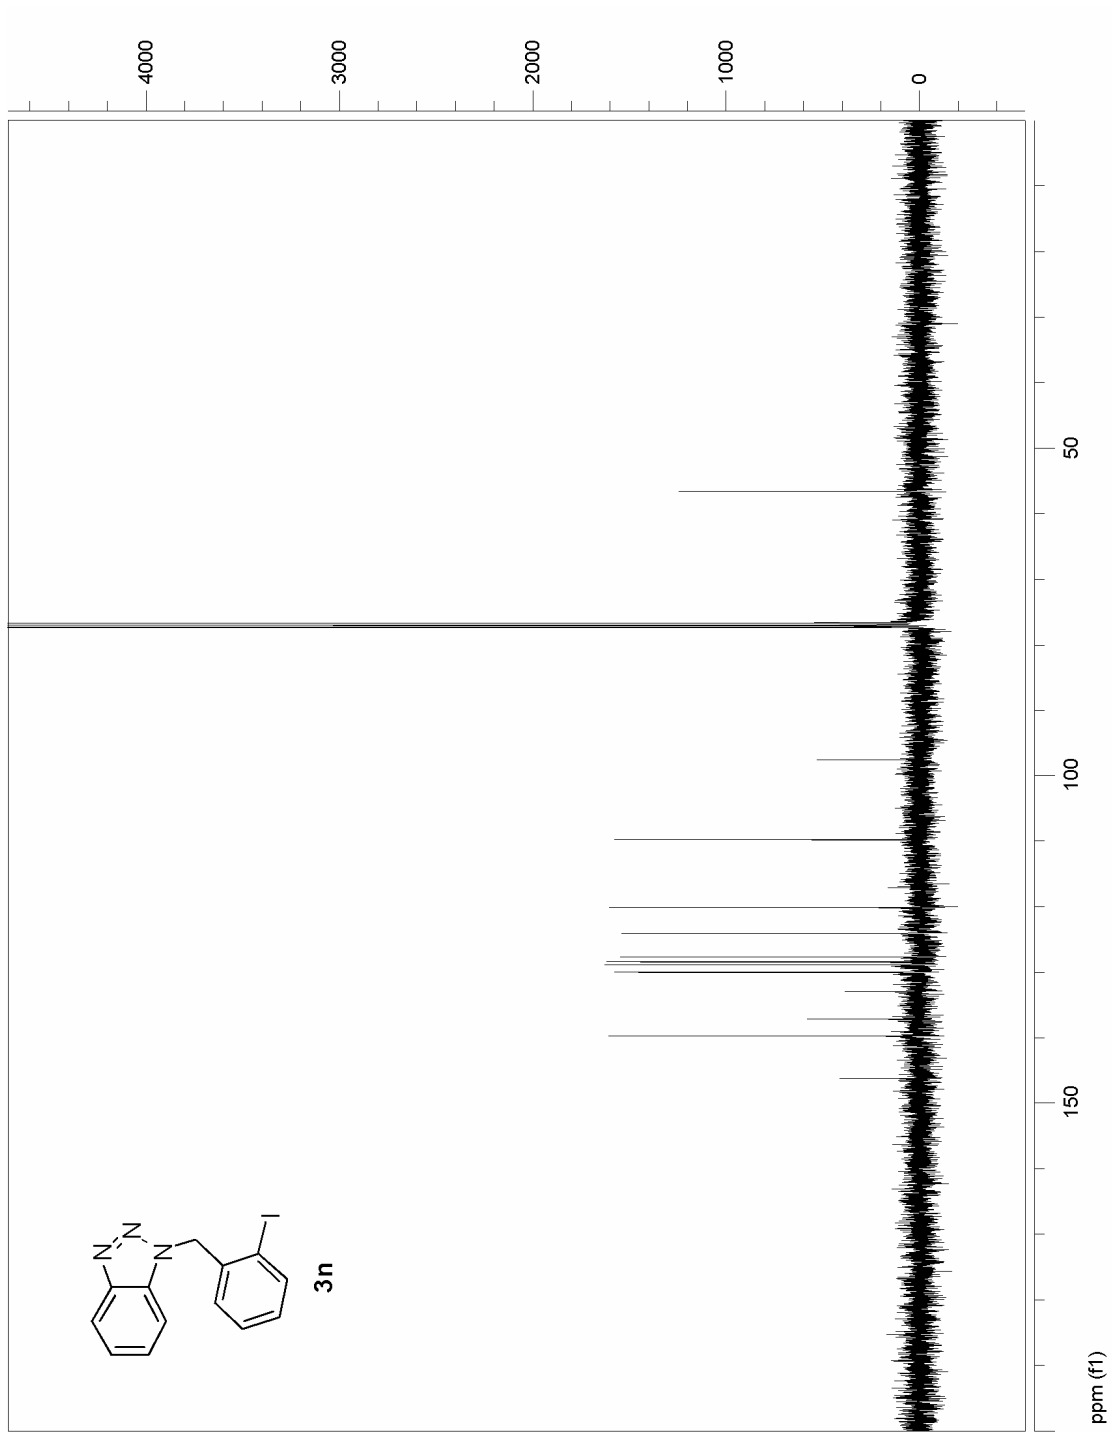

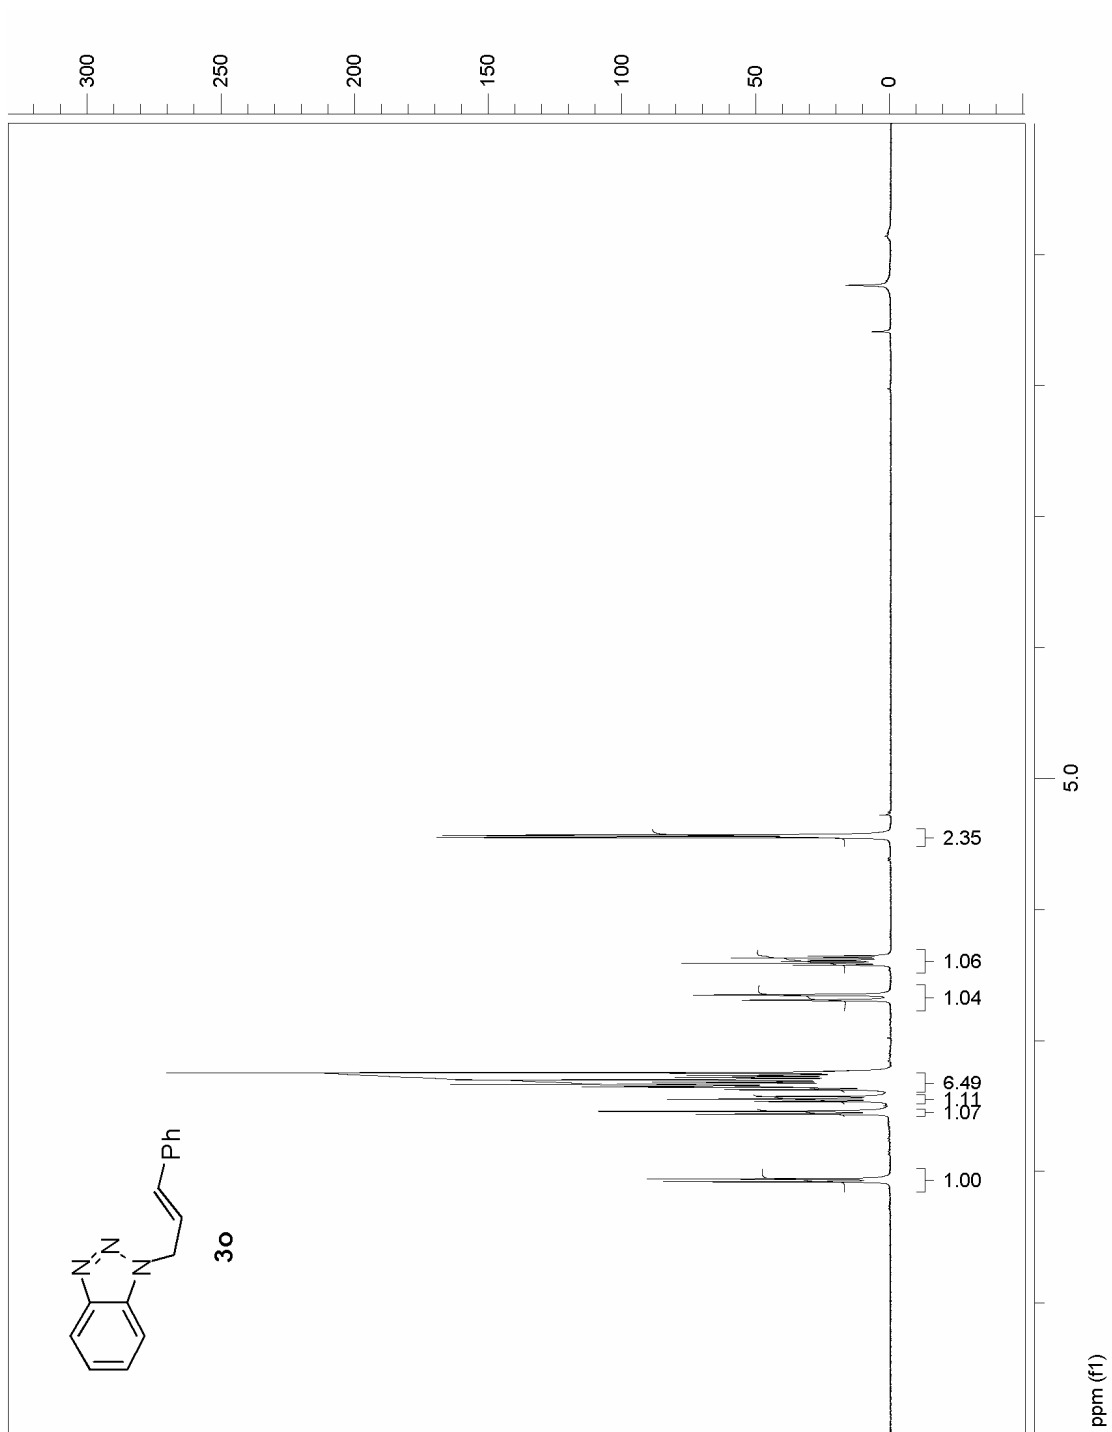

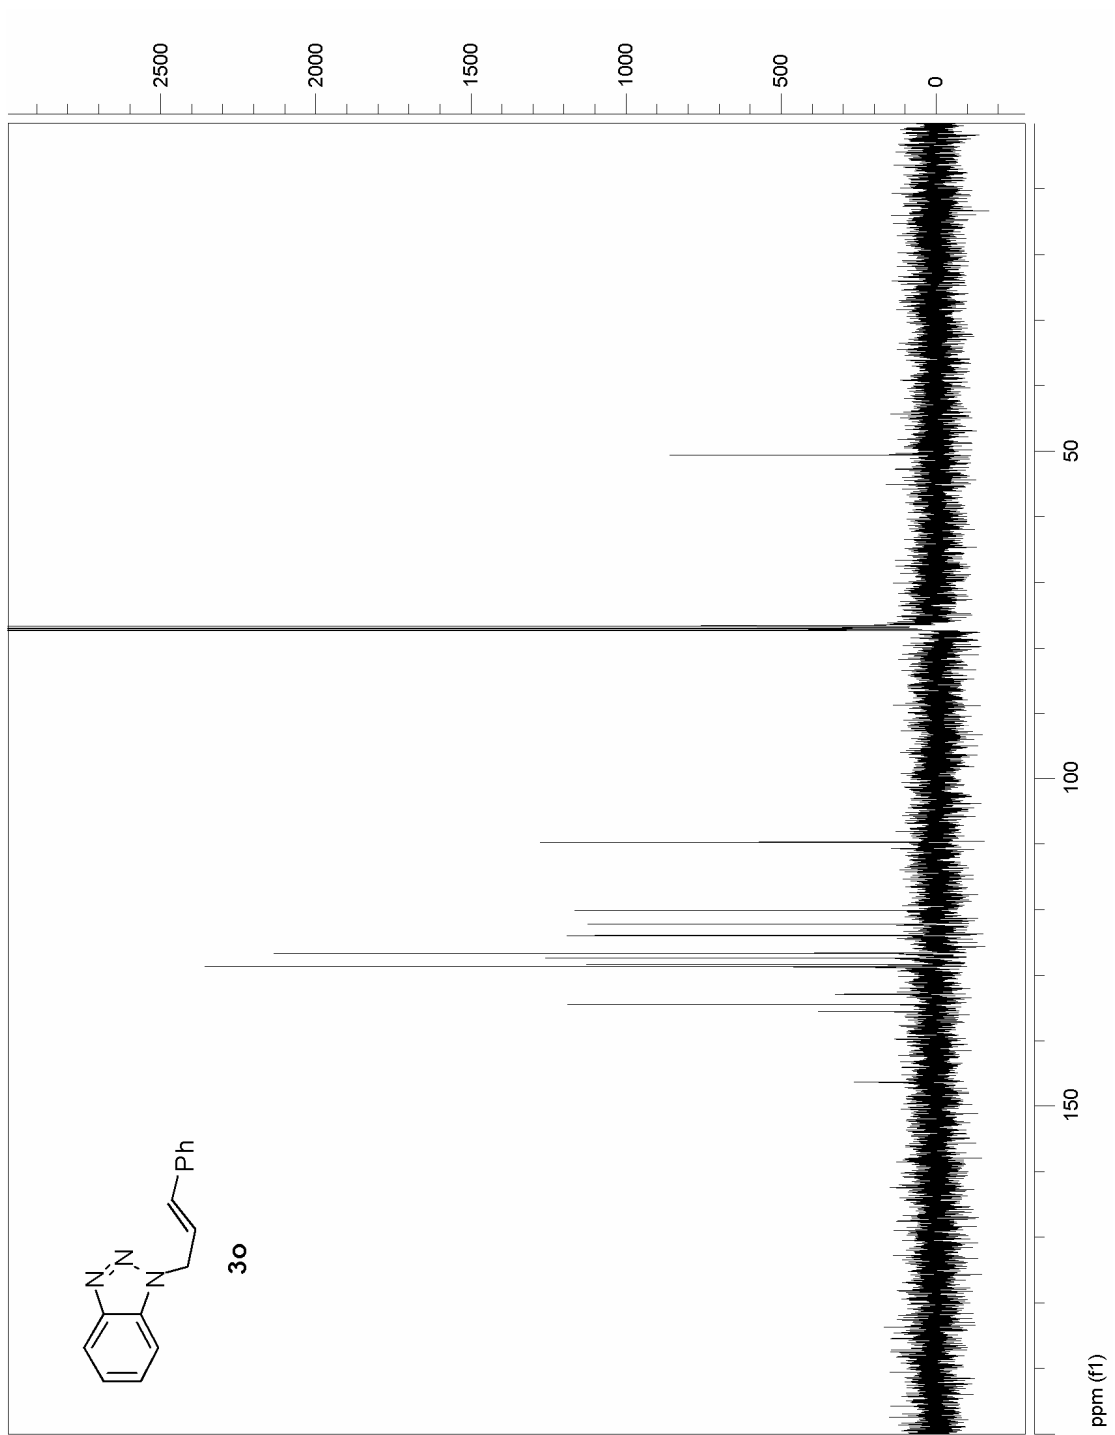



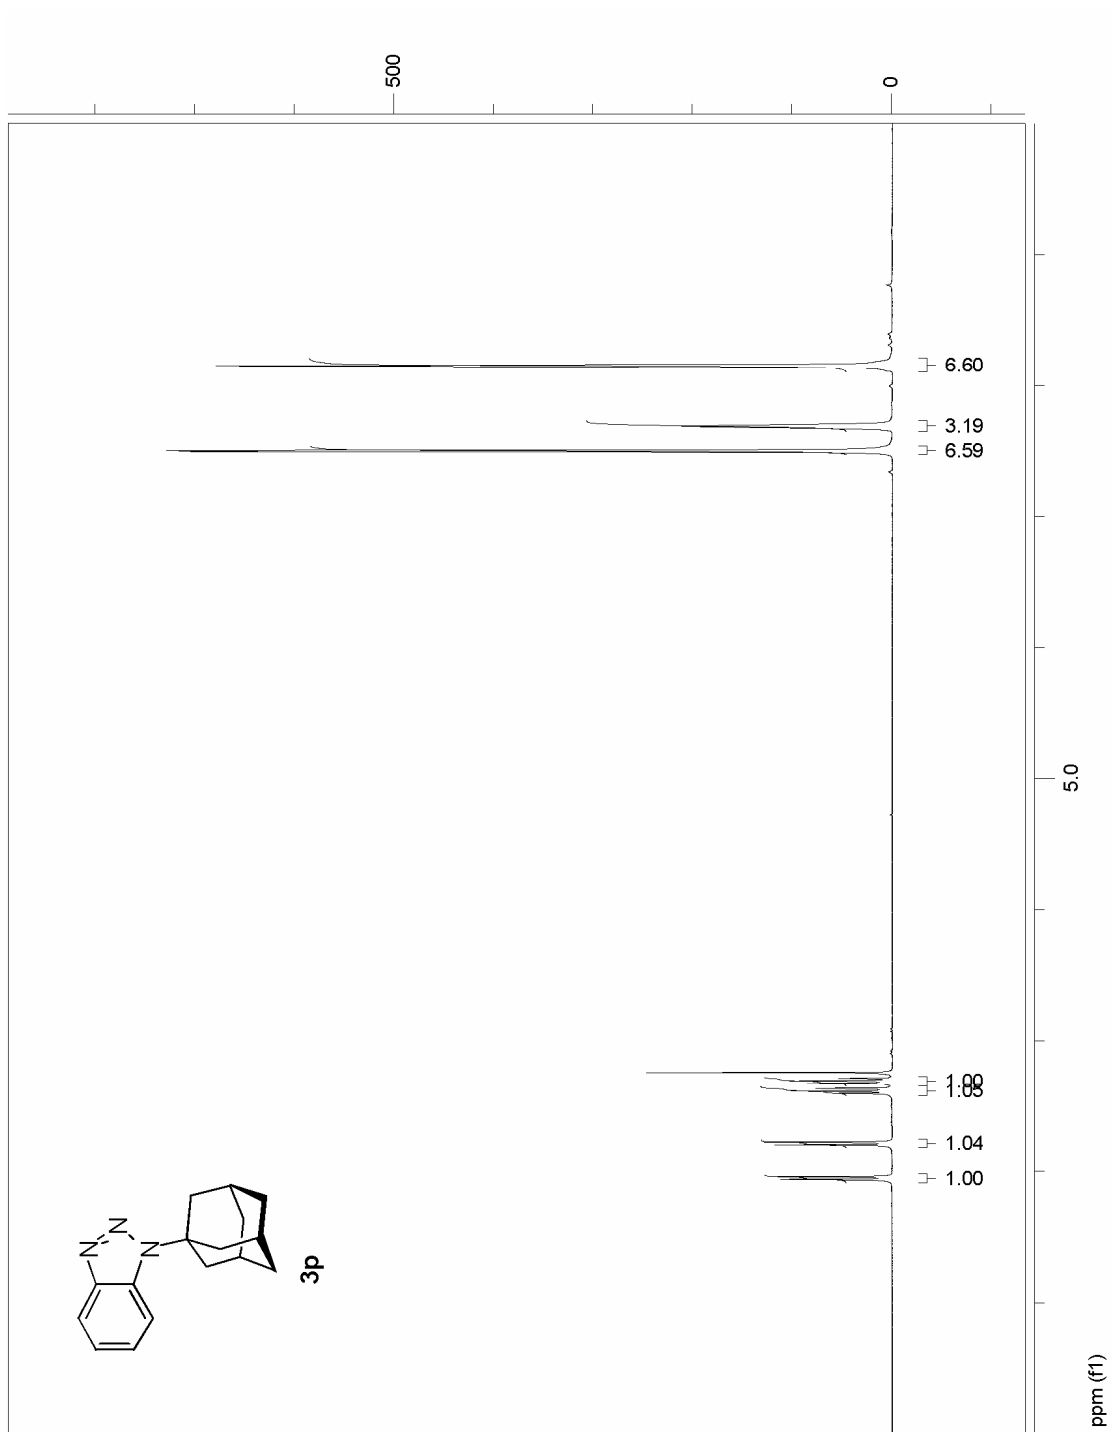

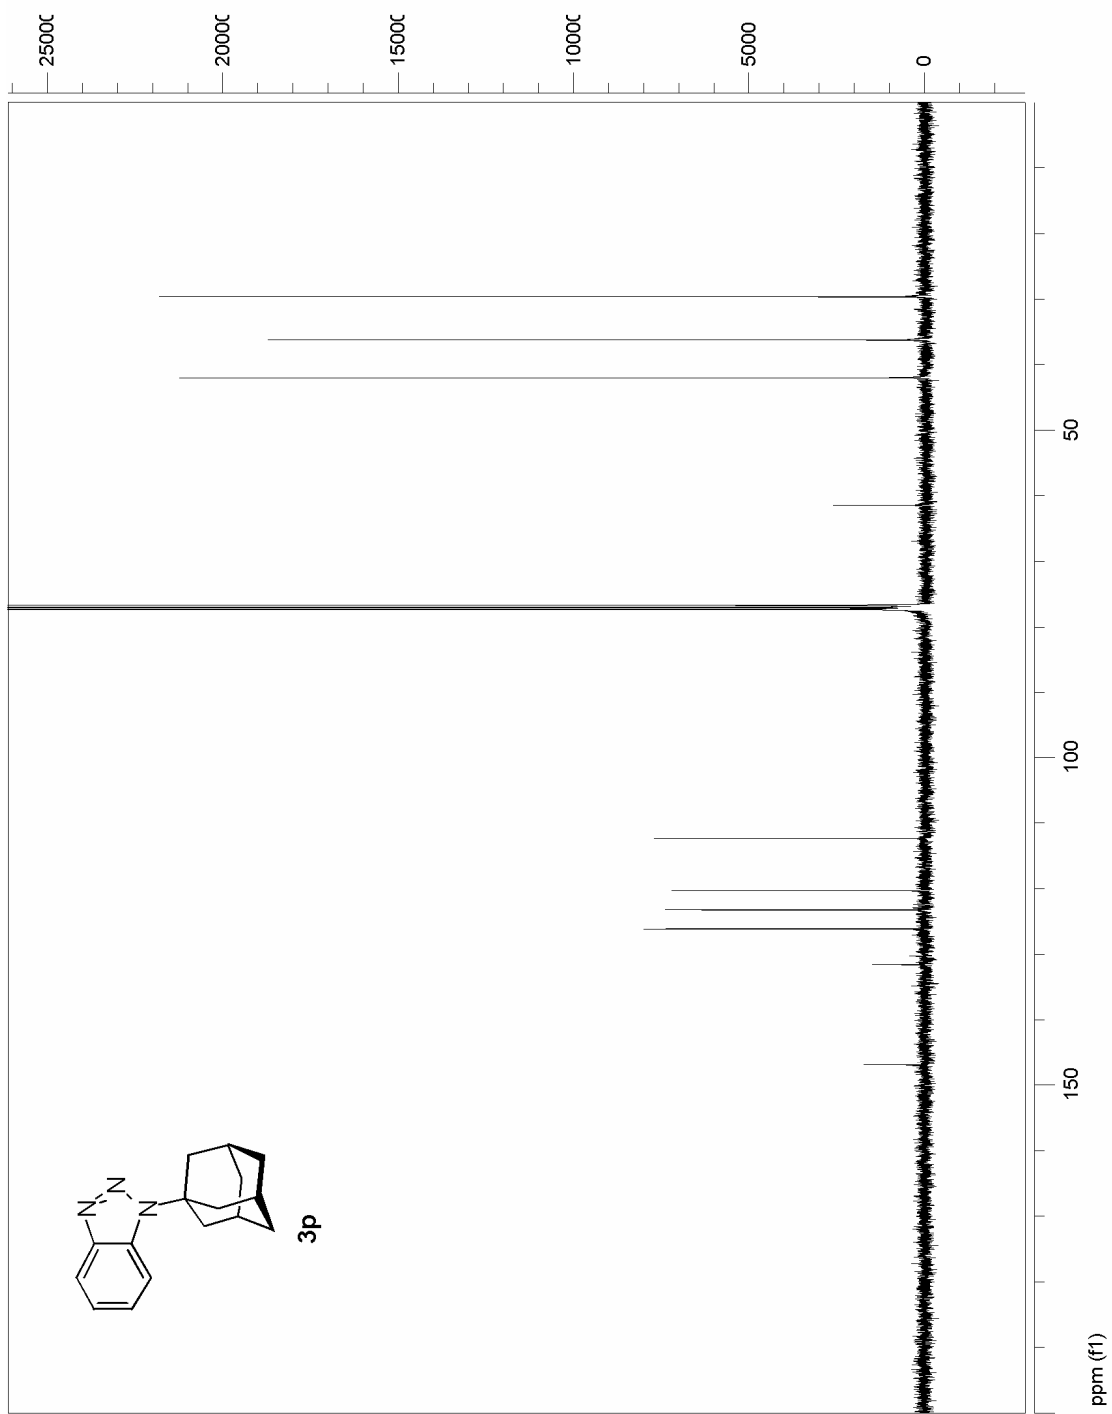

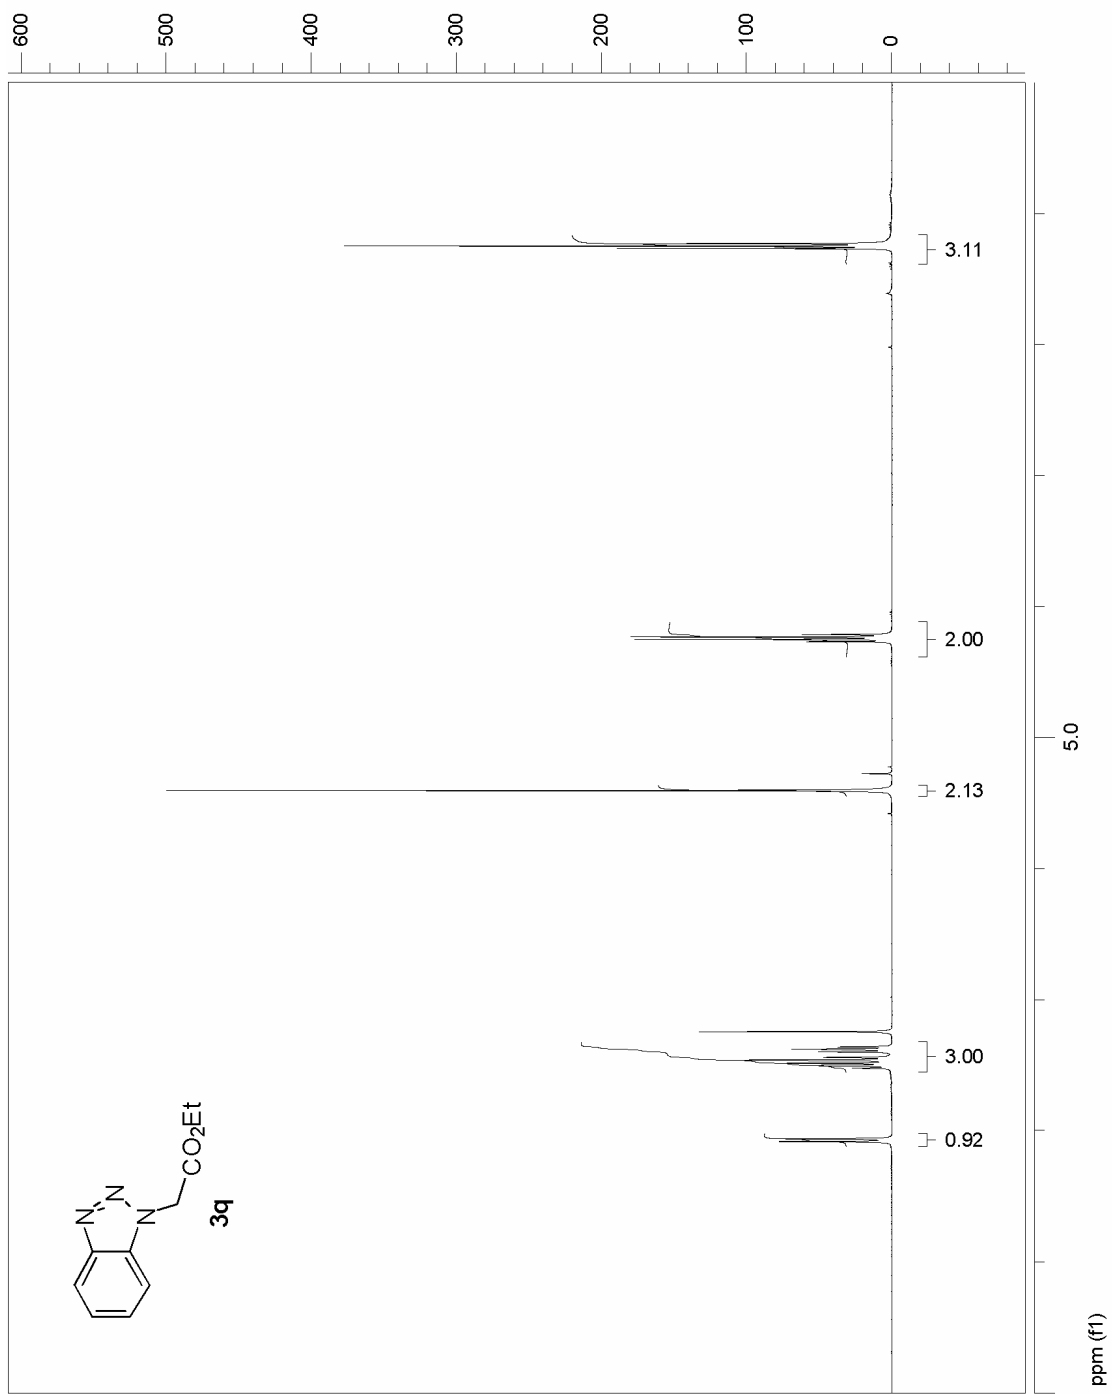

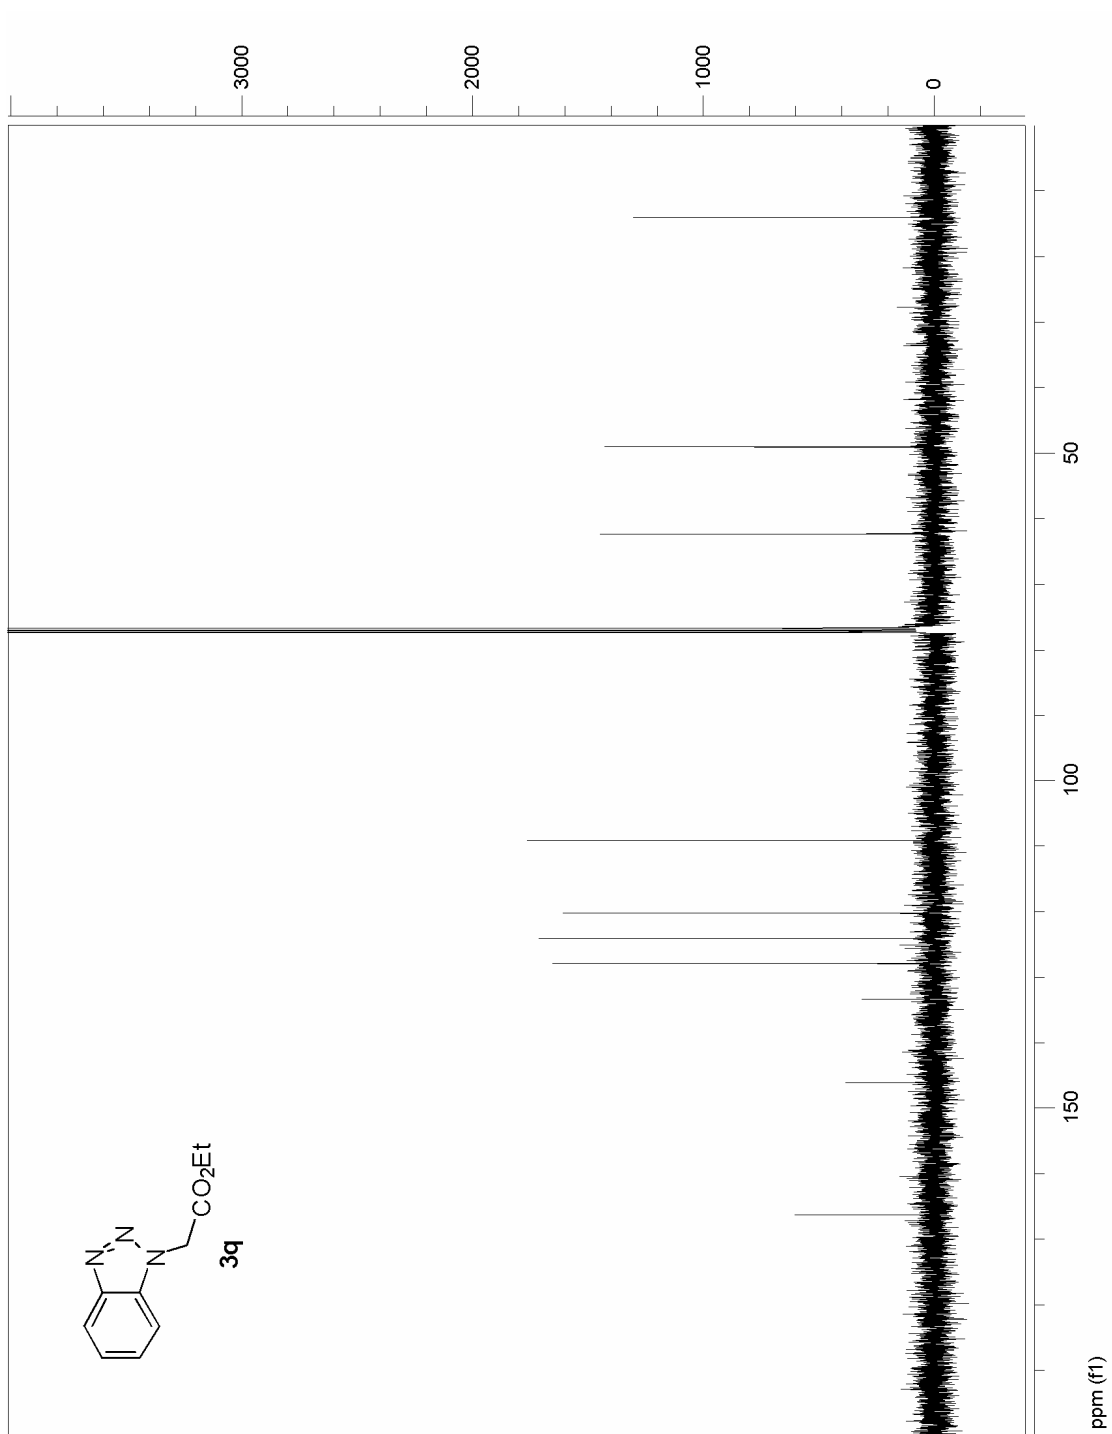

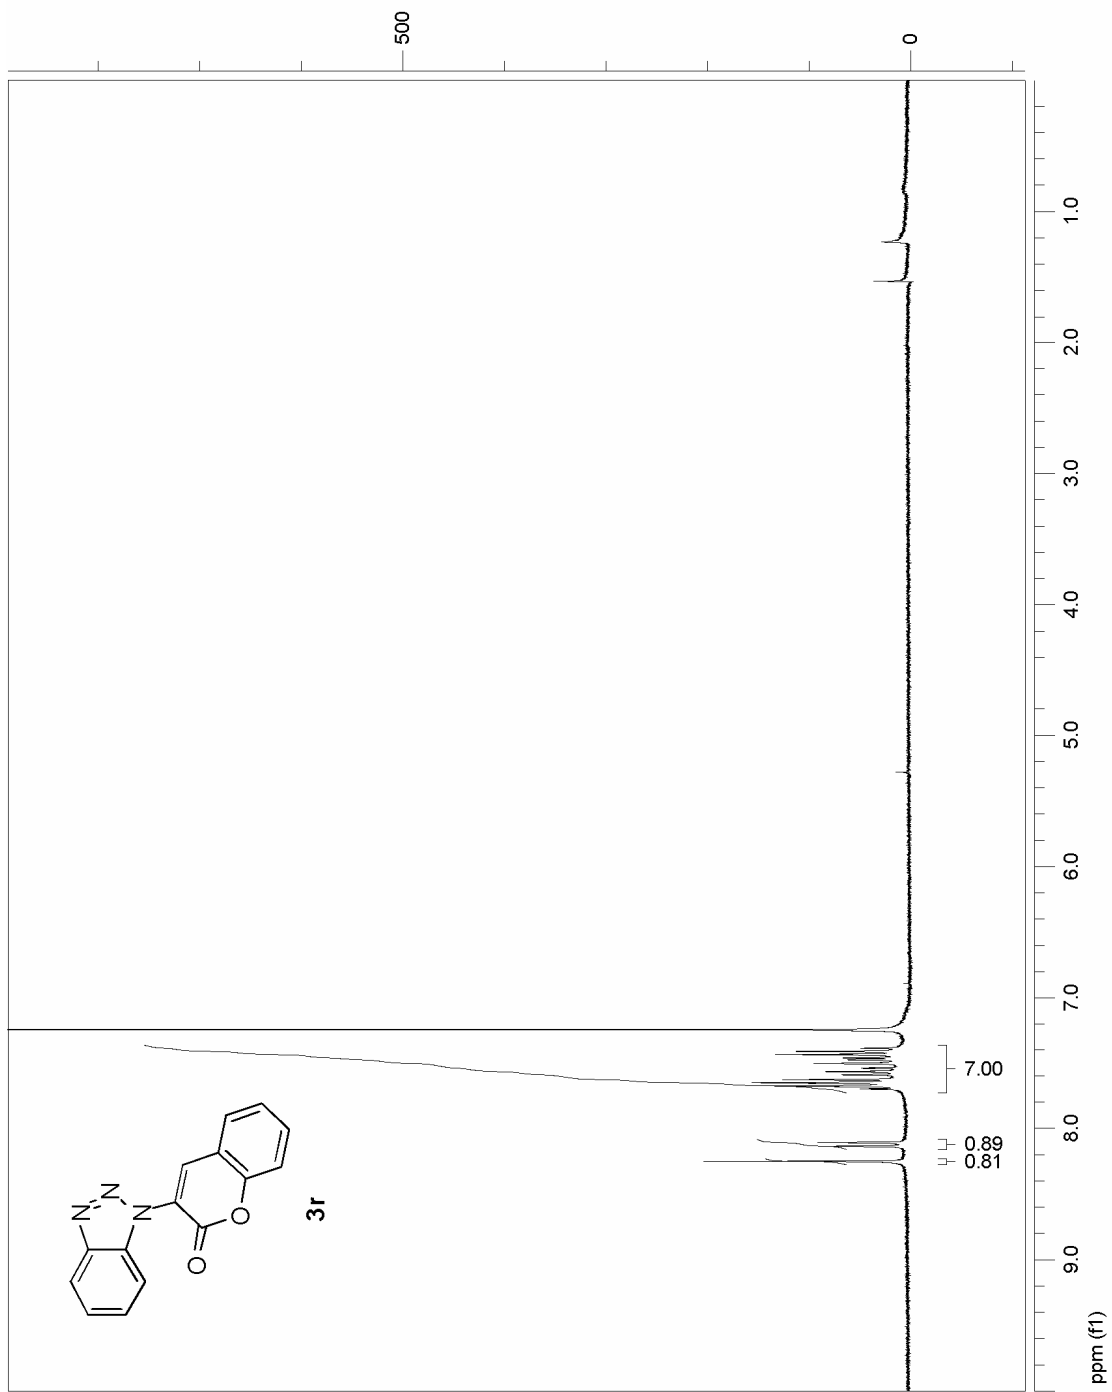

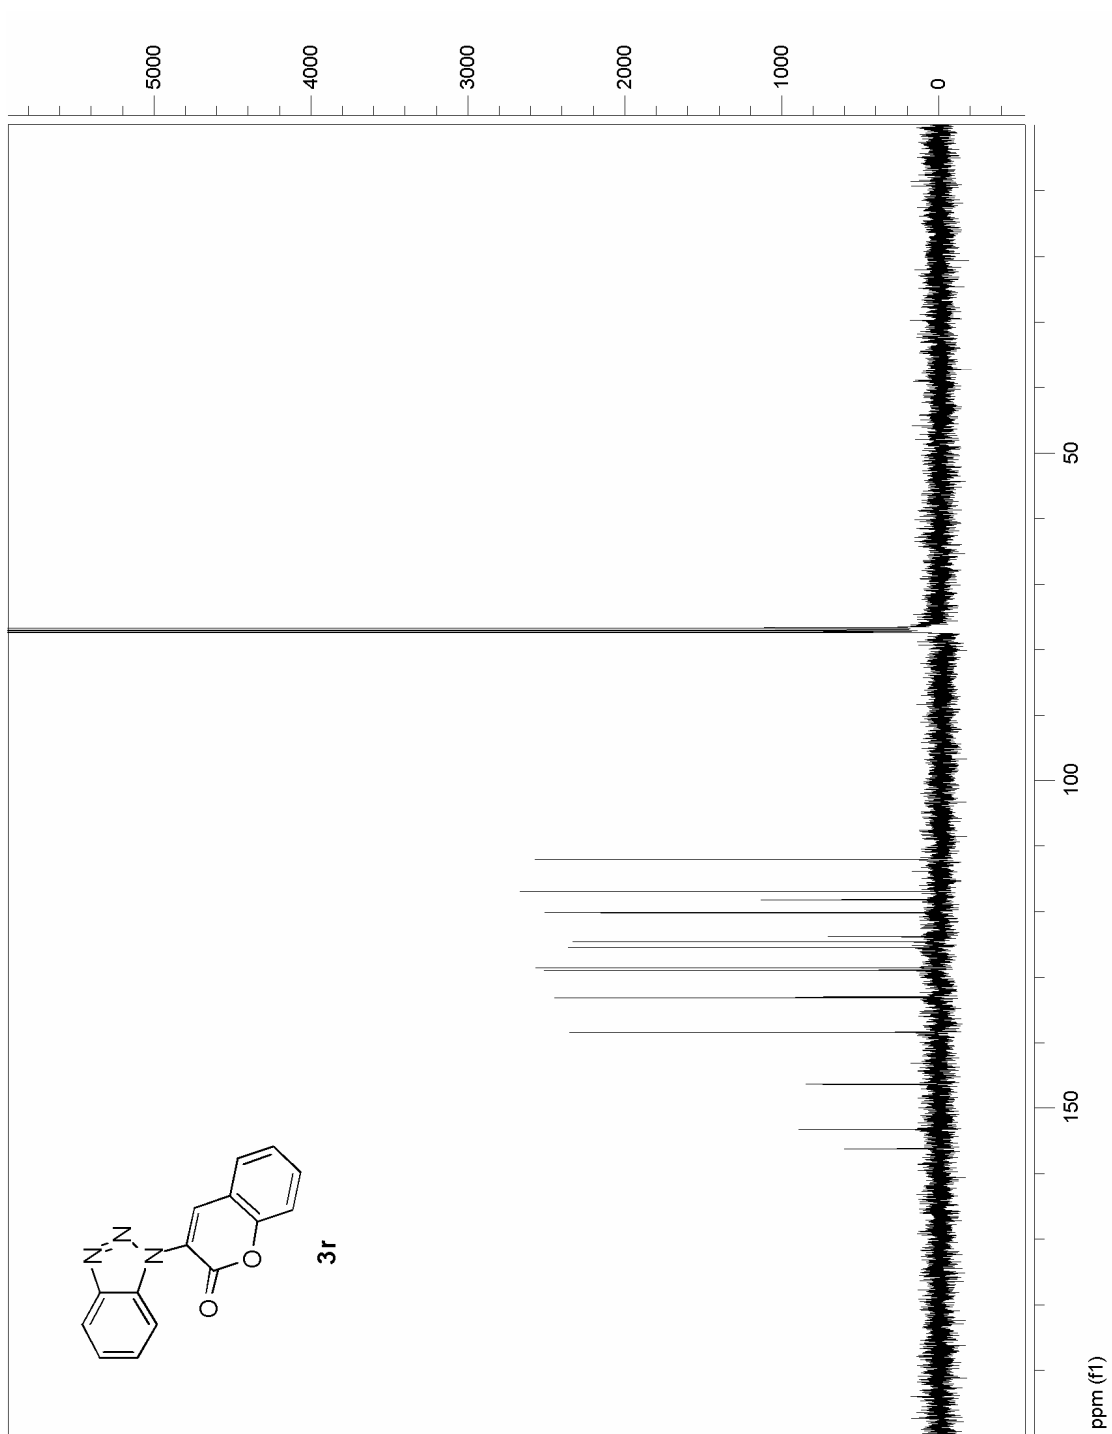

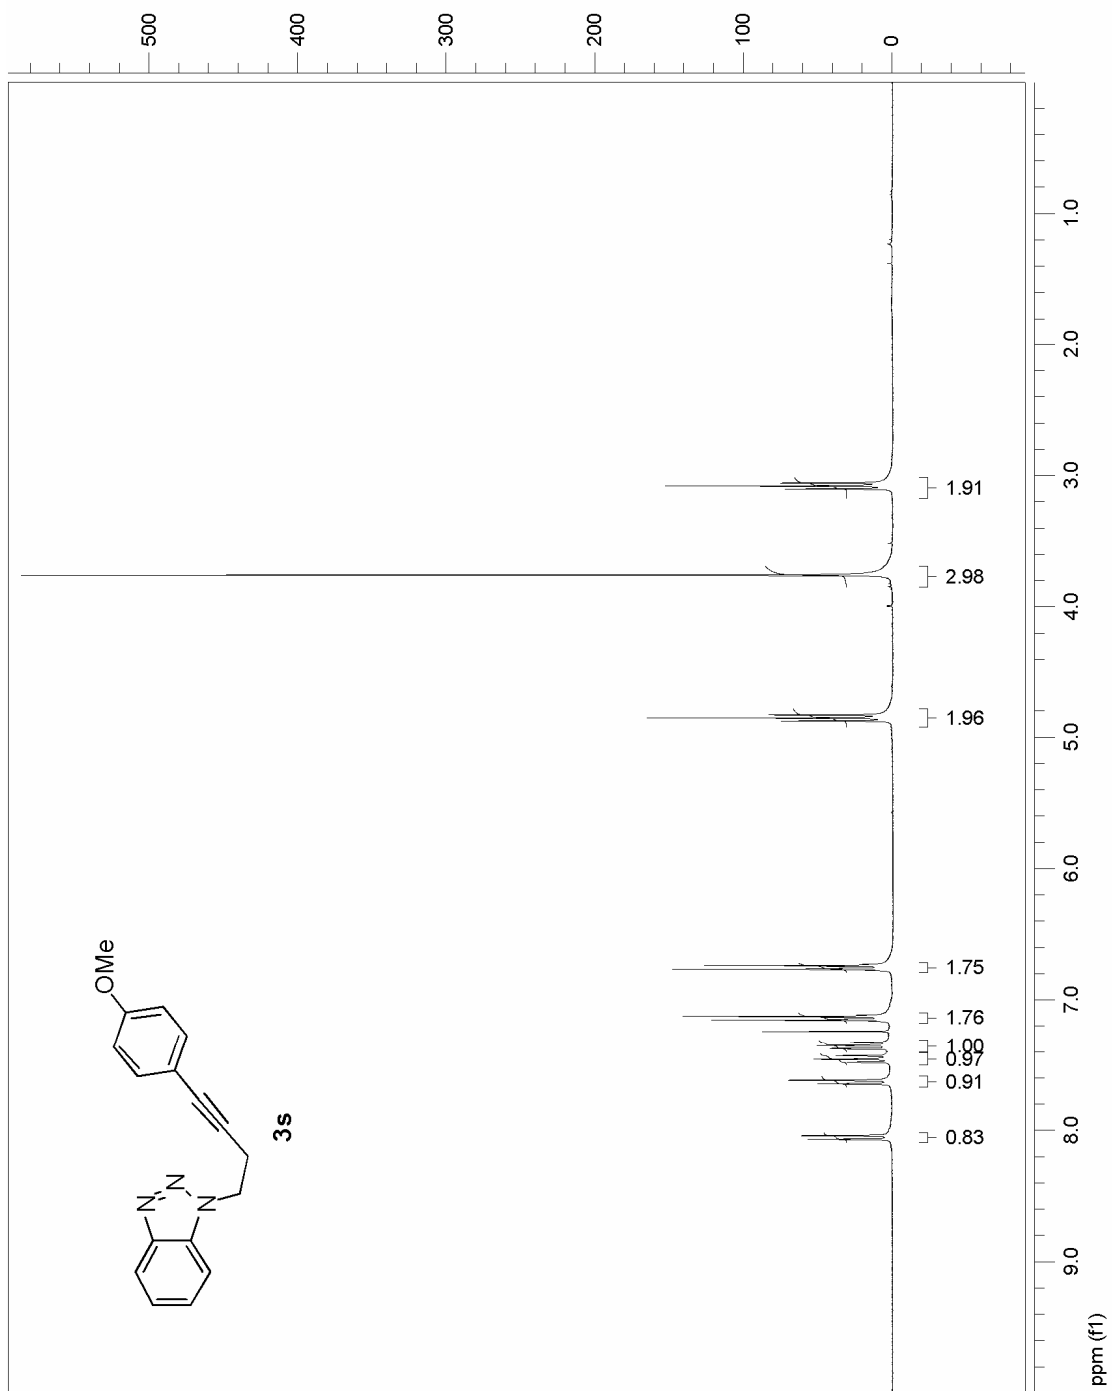

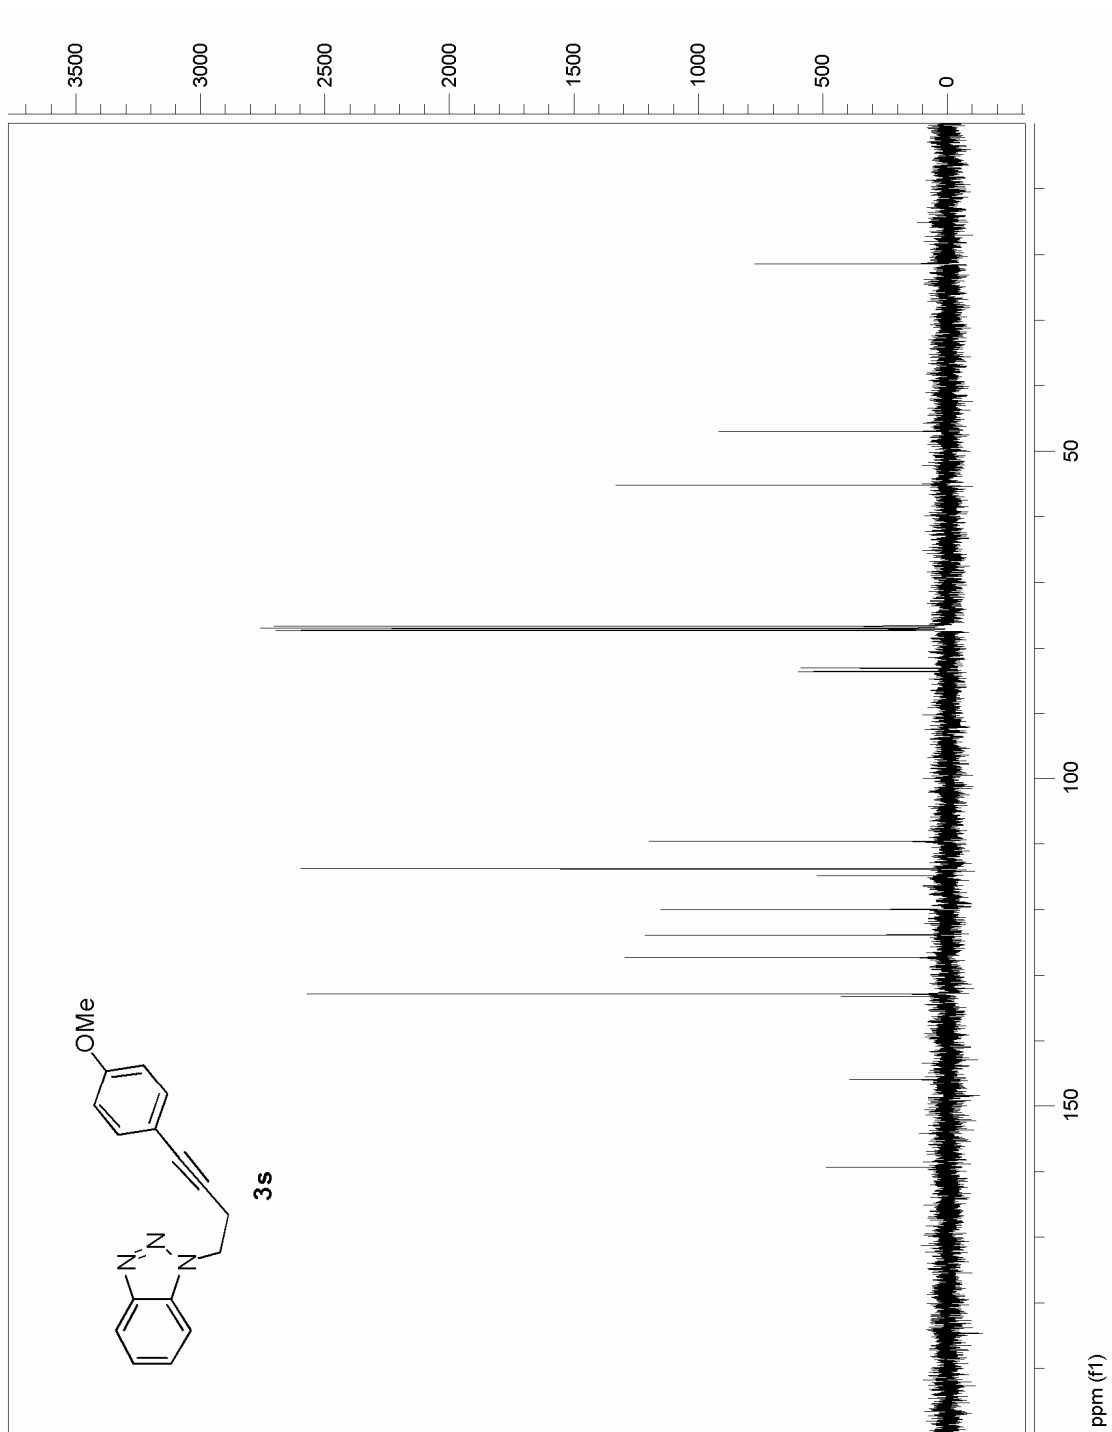



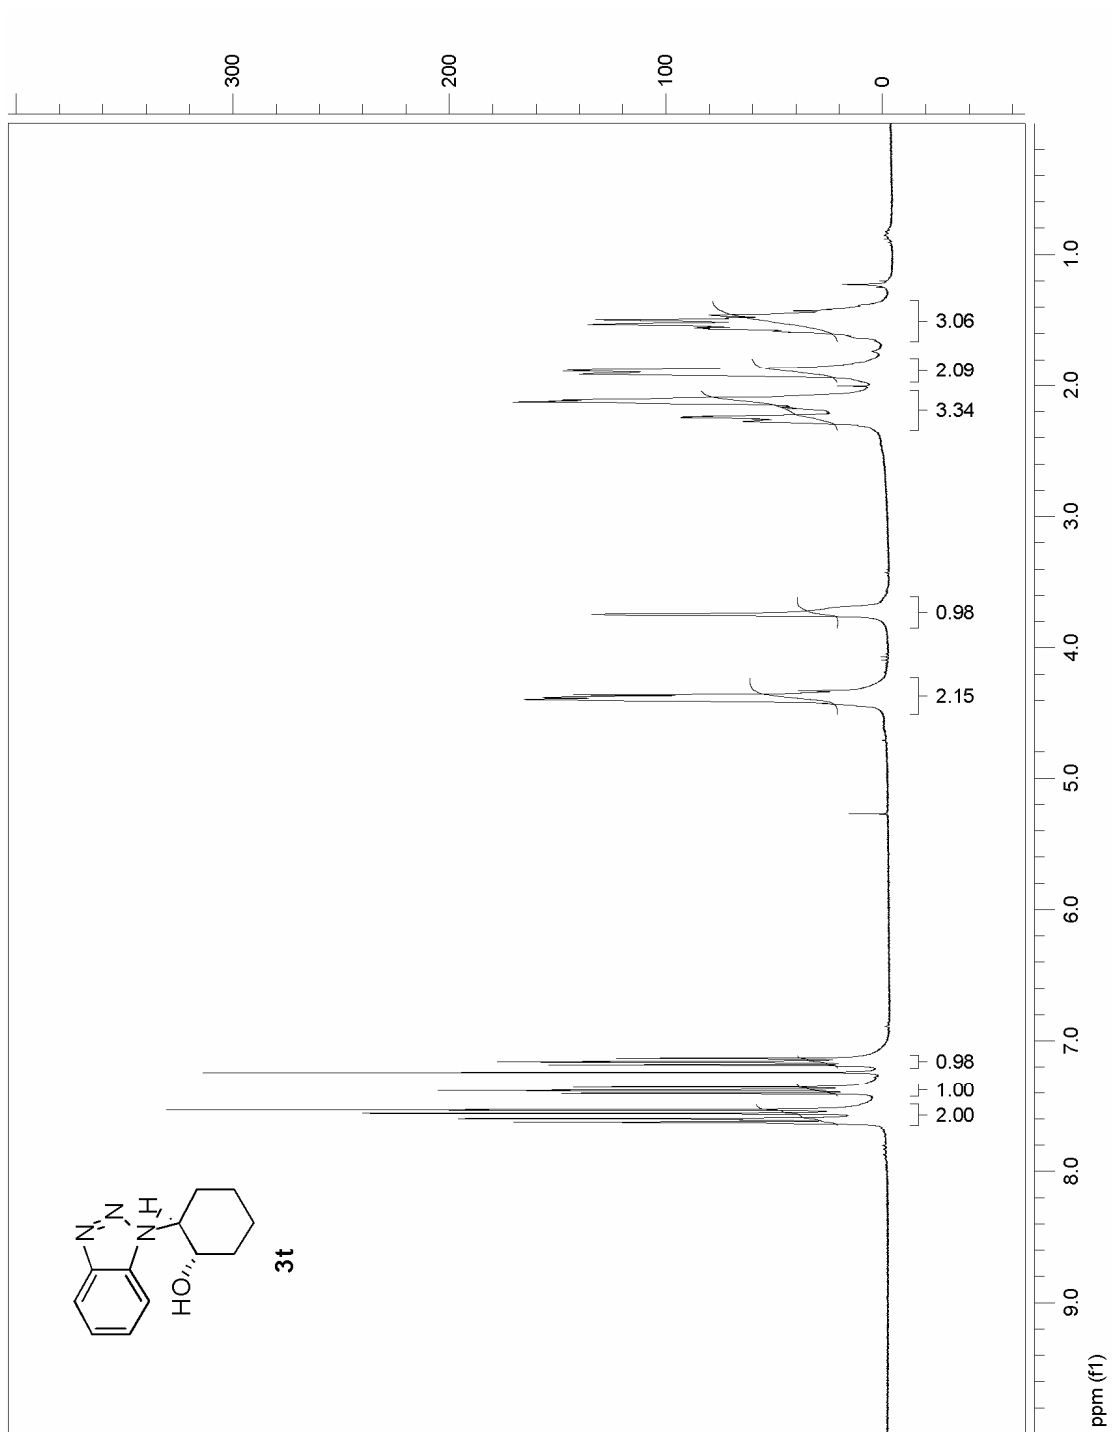

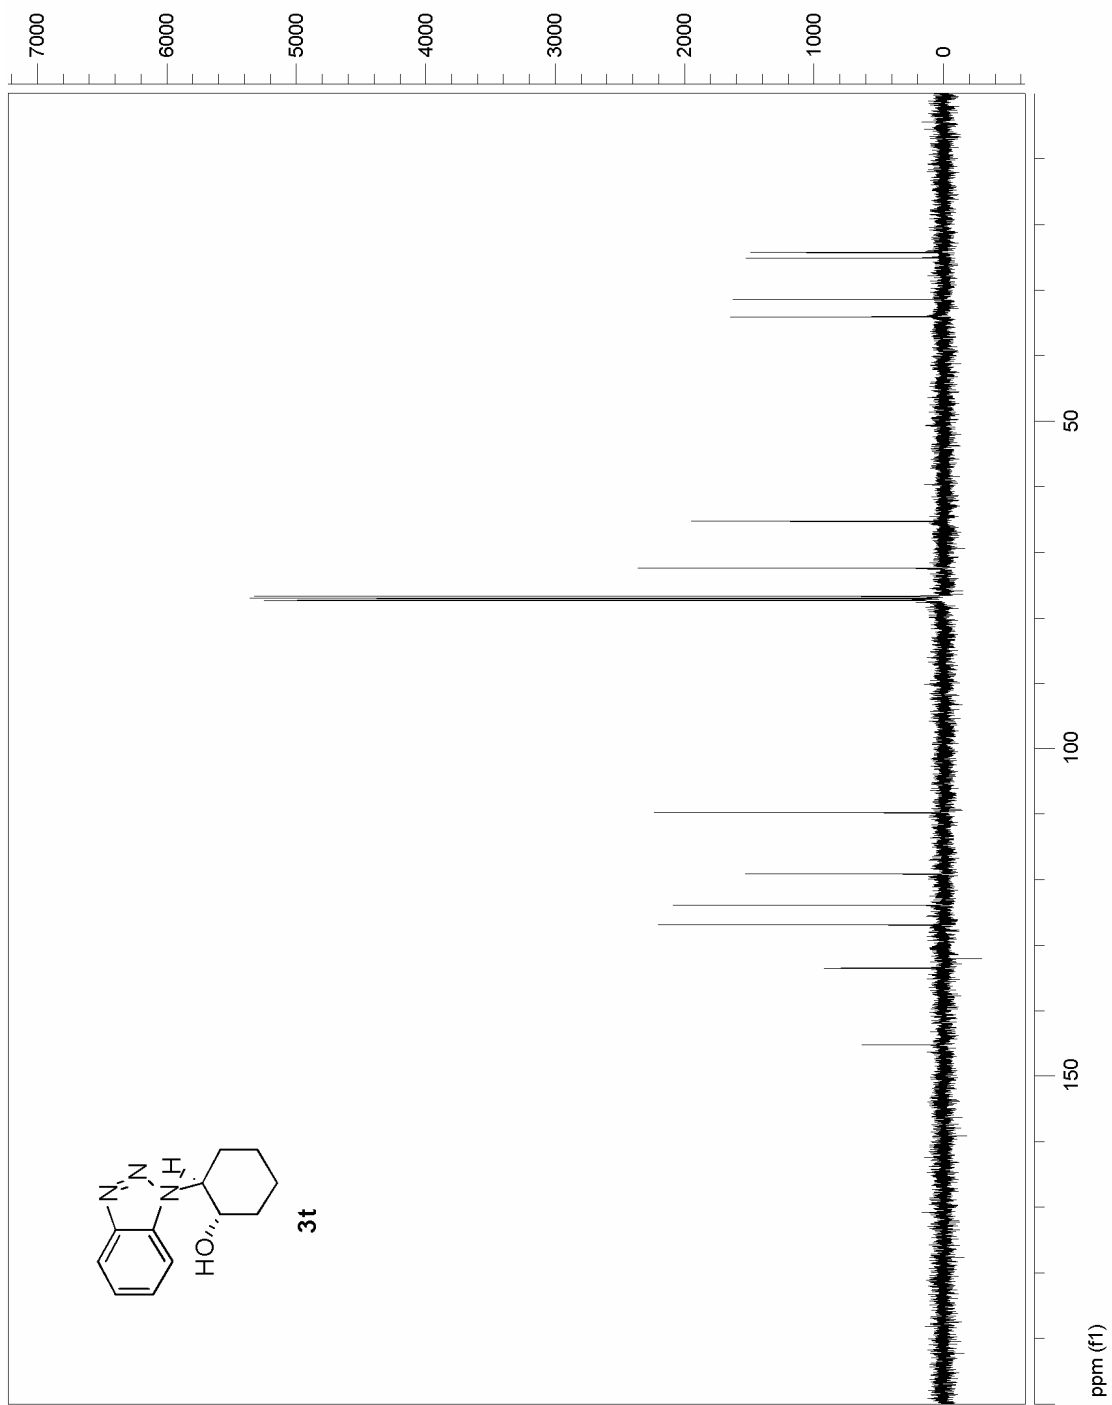

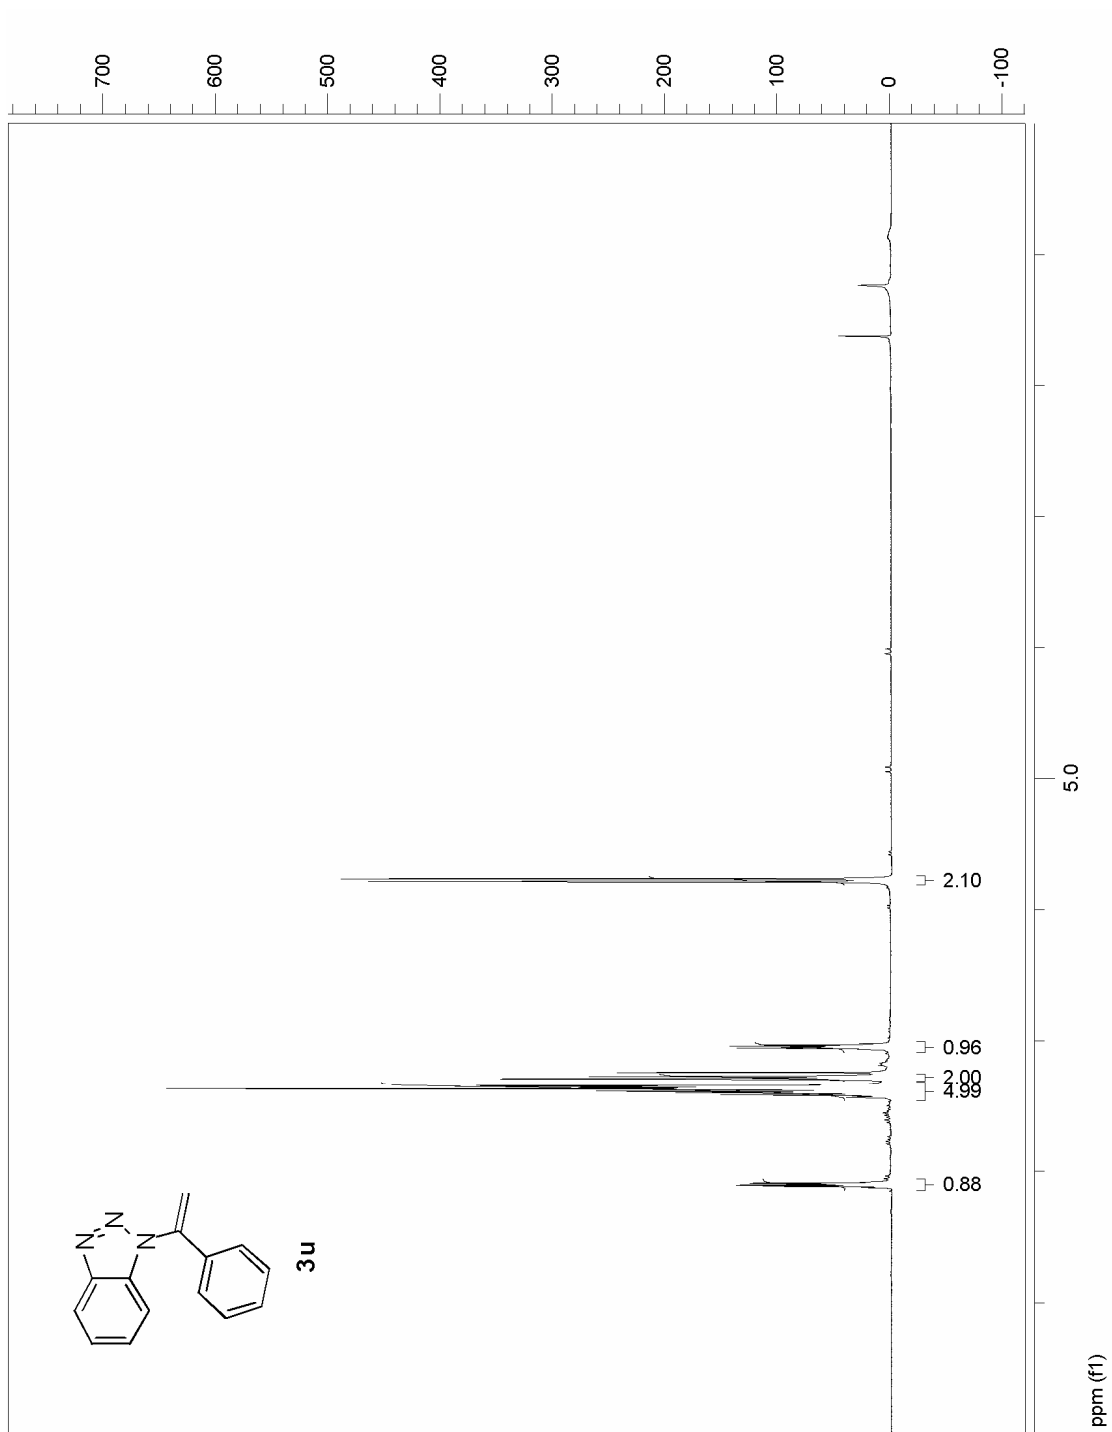

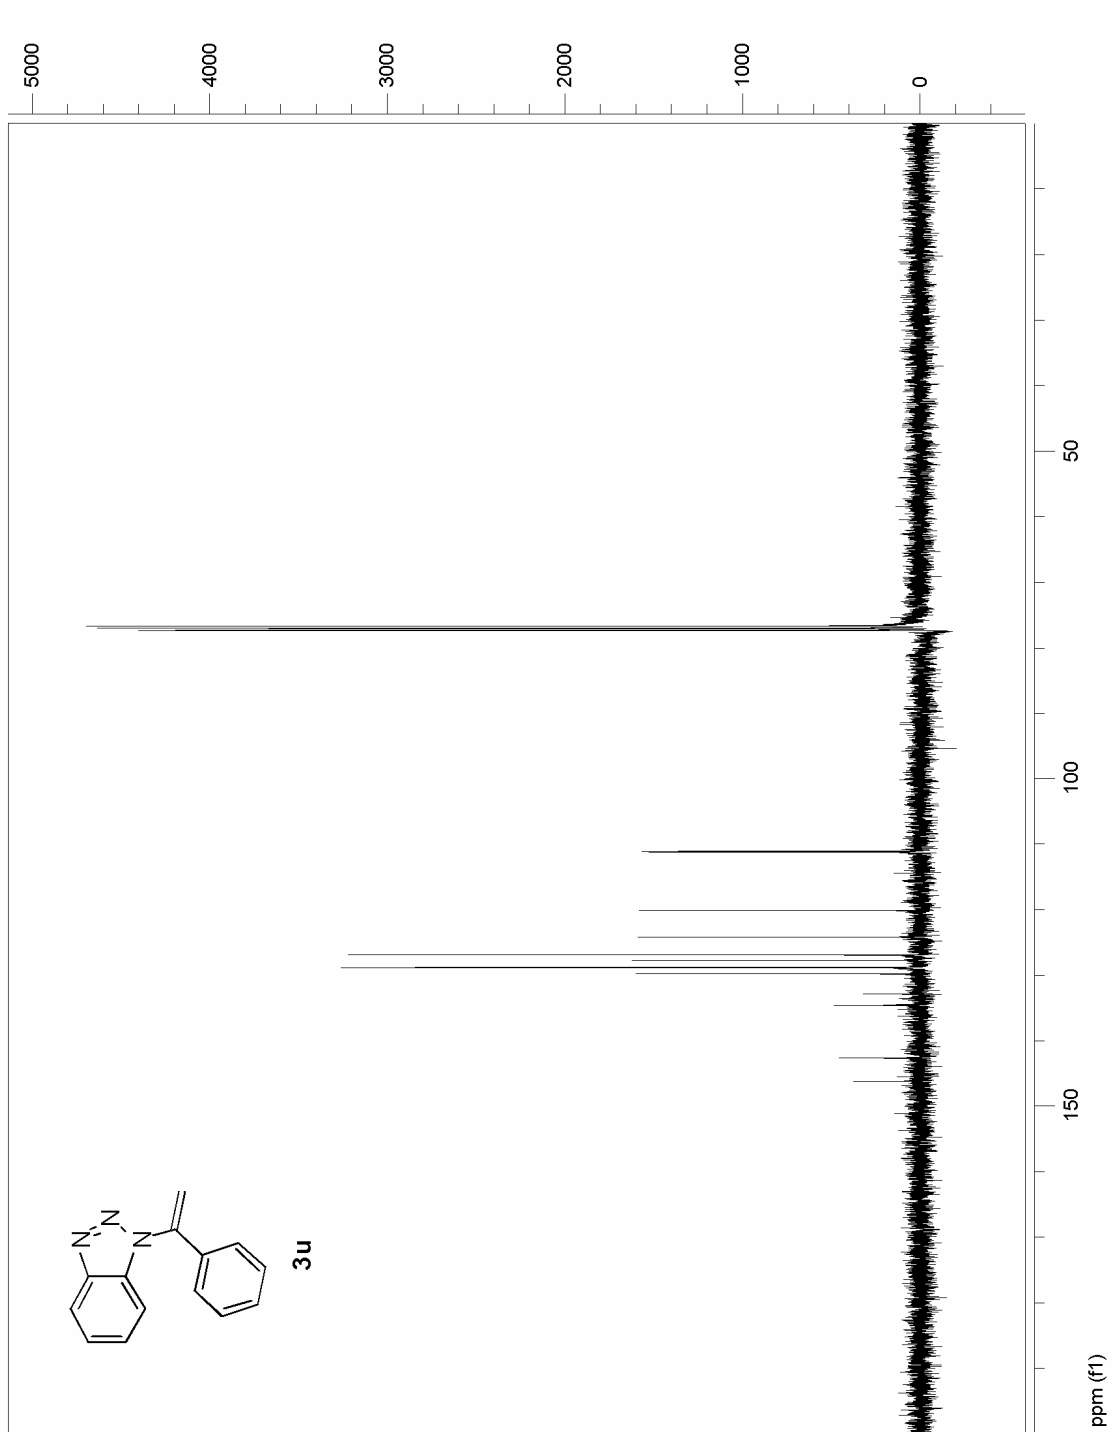

Supplement: NIHMS489955-supplement-489955.pdf [file NIHMS489955-supplement-489955.pdf]
